# Supplementary material for: Diversity Assessment of Some Sesame (Sesamum indicumL.) Genotypes Cultivated in Northern Ghana Using Morphological and Simple Sequence Repeat (SSR) Markers
Source: Hindawi journal article supplement (doi:10.1155/2019/6067891), 2019-02-03
Supplement: f1 [file 6067891.f1.xlsx]

## Sheet: Morphological data
REP	ACCESSIONS	EMERGENCE COUNT	STEM HAIRNESS	LEAF HAIRNESS	NUM OF FLOWERS/AXIL	PLANT HEIGHT @FLOWER INITIATION(cm)	BRANCHING PATTERN	NUM OF BRANCHES/PLANT	LENGTH OF FIRST CAPSULE (cm)	CAPSULE HAIRNESS	NUM OF CARPELS/CAPSULE	AVERAGE NUMBER OF CAPSULE/PLANT	AVERAGE NUMBER OF SEEDS/CAPSULE		DATES TO FIRST FLOWER INITIATION	DATES TO 50% FLOWERING
1	SI	44	7	7	2	55	1	2	2	7	4	40.3	53.4		2015-09-29	2015-10-01
1	S2	123	3	3	1	70	2	3	2.4	3	4	48.3	64		2015-09-29	2015-10-07
1	S3	57	7	7	2	85.3	1	2	3.6	7	4	110	74		2015-09-24	2015-09-27
1	S4	97	3	3	1	96.6	2	4	2.7	5	4	130	77		2015-10-04	2015-10-13
1	S5	63	3	3	1	76.7	2	5	2.6	5	4	160.5	80		2015-10-01	2015-10-11
1	C1	27	3	3	2	98.4	2	4	2.6	5	4	111.5	76		2015-10-08	2015-10-14
1	C2	50	0	0	1	74.2	1	3	2.9	7	4	75	68		2015-10-05	2015-10-12
1	C3	54	7	3	1	100	2	7	2.9	3	4	112	76.8		2015-10-03	2015-10-08
1	C4	88	3	3	1	83.1	2	4	2.7	5	4	100.1	74.2		2015-10-01	2015-10-08
1	C5	85	3	3	2	78	2	3	2.7	5	4	48.3	60.8		2015-09-29	2015-10-07
1	W1	62	3	3	1	55.4	2	5	3.2	5	4	135	78		2015-10-01	2015-10-08
1	W2	89	3	3	1	88.6	2	4	2.7	5	4	131.3	69.6		2015-09-29	2015-10-08
1	W3	62	5	5	1	94.2	2	7	2.8	7	4	141	80		2015-10-03	2015-10-11
1	W4	90	3	3	1	51	2	2	2.6	5	4	57.3	67		2015-10-01	2015-10-08
1	W5	110	3	3	1	90.1	2	4	2.8	5	4	137.3	74.5		2015-09-29	2015-10-07
1	K1	58	7	7	1	82	1	2	2.9	7	4	53.8	68		2015-09-29	2015-10-01
1	K2	54	0	0	1	63	2	6	3.1	7	4	70.2	72.6		2015-10-01	2015-10-22
1	K3	45	0	0	1	70.2	2	5	2.9	3	4	53.5	66		2015-10-01	2015-10-11
1	K4	45	0	3	1	62.9	2	5	3.2	7	4	103.5	76		2015-09-29	2015-10-07
1	K5	29	3	5	1	58	1	2	2.9	7	4	73.3	72.8		2015-09-29	2015-10-01
1	T1	38	5	5	1	71	2	4	2.6	5	4	49.5	58		2015-10-08	2015-10-14
1	T2	105	5	5	1	78.9	2	4	2.6	5	4	78	72		2015-10-04	2015-10-11
1	T3	84	3	3	1	80.1	2	4	2.9	5	4	89	74		2015-10-08	2015-10-14
1	T4	64	5	5	1	78.3	2	3	2.9	5	4	77.5	76		2015-10-07	2015-10-13
1	T5	76	3	3	1	88.3	2	3	2.7	5	4	80	77.3		2015-10-03	2015-10-08
2	SI	56	7	7	2	62	1	2	2.1	7	4	49.3	52		2015-10-24	2015-09-27
2	S2	116	3	3	1	66	2	4	2.5	3	4	53.3	66		2015-10-30	2015-10-05
2	S3	42	7	7	2	90.5	1	2	3.7	7	4	116	76		2015-10-24	2015-09-27
2	S4	46	3	3	1	81	2	4	2.7	5	4	135	80		2015-10-01	2015-10-07
2	S5	68	3	3	1	79.1	2	5	2.7	5	4	167.5	78		2015-10-01	2015-10-05
2	C1	112	3	3	2	75.1	2	4	2.6	5	4	117.5	70		2015-09-29	2015-10-05
2	C2	113	0	0	1	68	1	3	2.9	7	4	61	70		2015-09-29	2015-10-05
2	C3	36	7	3	1	100.7	2	7	2.9	3	4	118	79		2015-09-29	2015-10-05
2	C4	57	3	3	1	72.2	2	4	2.7	5	4	104	73.8		2015-10-01	2015-10-05
2	C5	116	3	3	2	77.4	2	3	2.7	5	4	53.3	62		2015-09-29	2015-10-05
2	W1	78	3	3	1	70.3	2	5	3.2	5	4	140	81		2015-09-29	2015-10-05
2	W2	78	3	3	1	97.5	2	4	2.7	5	4	136.3	74		2015-09-29	2015-10-07
2	W3	44	5	5	1	67.1	2	7	2.8	7	4	146	78		2015-09-30	2015-10-05
2	W4	106	3	3	1	50	2	2	2.5	5	4	57.3	66		2015-09-29	2015-10-04
2	W5	55	3	3	1	95.6	2	4	2.8	5	4	138.3	80		2015-09-30	2015-10-05
2	K1	33	7	7	1	96.6	1	2	2.9	7	4	55.8	60		2015-09-27	2015-09-29
2	K2	45	0	0	1	64	2	6	3.1	7	4	70.2	74		2015-09-29	2015-10-05
2	K3	67	0	0	1	55.6	2	5	2.9	3	4	55.5	65		2015-09-30	2015-10-07
2	K4	70	0	3	1	89.3	2	5	3.2	7	4	107.5	74		2015-09-28	2015-10-04
2	K5	87	3	5	1	65	1	2	2.9	7	4	79.3	70		2015-09-24	2015-09-27
2	T1	75	5	5	1	67	2	4	2.6	5	4	51.5	66		2015-10-01	2015-10-08
2	T2	37	5	5	1	80.8	2	4	2.6	5	4	78	70		2015-10-01	2015-10-05
2	T3	47	3	3	1	81.6	2	4	2.9	5	4	89	76		2015-10-01	2015-10-05
2	T4	37	5	5	1	90	2	3	2.9	5	4	77.5	73		2015-10-01	2015-10-05
2	T5	85	3	3	1	83.1	2	3	2.7	5	4	80	74		2015-09-30	2015-10-05
3	SI	126	7	7	2	71	1	2	2.1	7	4	75	51.3		2015-10-24	2015-09-27
3	S2	88	3	3	1	70	2	3	2.5	3	4	111.4	62		2015-10-30	2015-10-05
3	S3	77	7	7	2	80.3	1	2	3.7	7	4	82.8	75		2015-10-24	2015-09-27
3	S4	106	3	3	1	88.3	2	4	2.7	5	4	89.8	74		2015-10-01	2015-10-07
3	S5	70	3	3	1	83	2	5	2.7	5	4	93.3	76		2015-10-01	2015-10-05
3	C1	86	3	3	2	78.3	2	4	2.6	5	4	105.7	79		2015-09-29	2015-10-05
3	C2	84	0	0	1	66	1	3	2.9	7	4	73.6	66		2015-09-29	2015-10-05
3	C3	21	7	3	1	81.7	2	7	2.9	3	4	65.7	78		2015-09-29	2015-10-05
3	C4	62	3	3	1	85.7	2	4	2.7	5	4	165	77		2015-10-01	2015-10-05
3	C5	67	3	3	2	87.2	2	3	2.7	5	4	122.8	66		2015-09-29	2015-10-05
3	W1	60	3	3	1	56	2	5	3.2	5	4	130	70		2015-09-29	2015-10-05
3	W2	88	3	3	1	90.8	2	4	2.7	5	4	80	78		2015-09-29	2015-10-07
3	W3	83	5	5	1	56.3	2	7	2.8	7	4	135	82		2015-09-30	2015-10-05
3	W4	26	3	3	1	82.1	2	2	2.5	5	4	128	69		2015-09-29	2015-10-04
3	W5	60	3	3	1	90.3	2	4	2.8	5	4	164.6	81		2015-09-30	2015-10-05
3	K1	83	7	7	1	78	1	2	2.9	7	4	77.1	62		2015-09-27	2015-09-29
3	K2	66	0	0	1	60	2	6	3.1	7	4	142	71.5		2015-09-29	2015-10-05
3	K3	94	0	0	1	58	2	5	2.9	3	4	74	63		2015-09-30	2015-10-07
3	K4	71	0	3	1	84.2	2	5	3.2	7	4	116.7	78		2015-09-28	2015-10-04
3	K5	81	3	5	1	65	1	2	2.9	7	4	92.8	72.8		2015-09-24	2015-09-27
3	T1	107	5	5	1	64.8	2	4	2.6	5	4	77.5	56		2015-10-01	2015-10-08
3	T2	53	5	5	1	78.3	2	4	2.6	5	4	96.7	69		2015-10-01	2015-10-05
3	T3	49	3	3	1	89.3	2	4	2.9	5	4	108.3	78		2015-10-01	2015-10-05
3	T4	82	5	5	1	90.7	2	3	2.9	5	4	96.5	70		2015-10-01	2015-10-05
3	T5	74	3	3	1	94.3	2	3	2.7	5	4	91	73		2015-09-30	2015-10-05

## Sheet: Molecular similarity
	W1	W2	W3	W4	W5	T1	T2	T3	T4	T5	S1	S2	S3	S4	S5	K1	K2	K3	K4	K5	C1	C2	C3	C4	C5
W1	0	2	3	4	5	6	7	8	9	10	11	12	13	14	15	16	17	18	19	20	21	22	23	24
W2	0.87037	0
W3	0.877193	0.87931	0
W4	0.90625	0.907692	0.878788	0
W5	0.929825	0.949153	0.968254	0.873016	0
T1	0.946429	0.947368	0.932203	0.868852	0.867925	0
T2	0.912281	0.913793	0.881356	0.925373	0.932203	0.729167	0
T3	0.964286	0.927273	1	0.920635	0.927273	0.836735	0.823529	0
T4	1	0.948276	0.915254	0.923077	0.929825	0.946429	0.949153	0.862745	0
T5	0.965517	0.966102	0.95082	0.939394	0.948276	0.946429	0.949153	0.884615	0.823529	0
S1	0.932203	0.95082	0.953125	0.910448	0.95082	0.966667	0.934426	0.929825	0.95	0.833333	0
S2	0.964286	0.982759	1	0.985075	0.946429	0.982143	0.983051	0.901961	0.982456	0.925926	0.890909	0
S3	0.983051	0.948276	0.967742	0.970588	1	0.927273	0.931034	0.90566	0.983051	0.947368	0.967213	0.884615	0
S4	0.981481	0.981818	0.982759	0.984375	0.981818	1	0.982143	1	0.981481	1	0.982456	1	1	0
S5	0.95	0.984127	0.969231	0.957143	0.984127	0.966667	0.984375	1	0.967213	0.95	0.935484	0.948276	0.983871	0.791667	0
K1	0.967742	0.968254	0.953846	0.957746	0.934426	0.95	0.952381	0.983607	0.95082	0.933333	0.953125	1	0.95082	0.907407	0.883333	0
K2	0.932203	0.984127	0.969231	0.957143	0.967742	1	0.984375	0.966102	0.967213	0.95	0.96875	0.983333	0.967213	0.884615	0.862069	0.844828	0
K3	0.967213	1	0.984848	0.971831	0.967742	0.966667	0.984375	0.966102	0.967213	0.983871	1	0.983333	0.95	0.925926	0.9	0.936508	0.8	0
K4	0.965517	0.983333	0.95082	1	0.983333	0.982759	0.983607	0.982456	0.947368	0.965517	1	0.964286	0.983051	0.962264	0.875	0.877193	0.932203	0.875	0
K5	1	1	0.978723	1	0.977273	0.95122	0.954545	1	0.976744	1	1	1	0.952381	0.973684	1	0.978723	0.955556	0.955556	0.952381	0
C1	0.984375	0.984615	0.970149	0.972603	0.952381	0.915254	0.936508	0.967213	0.984375	1	1	0.983871	0.968254	0.928571	0.953846	0.954545	0.9375	0.9375	0.951613	0.860465	0
C2	1	1	1	0.969231	1	0.943396	0.982759	1	0.963636	1	0.983051	0.981481	1	0.96	0.983051	0.966102	0.928571	0.867925	0.944444	0.921053	0.830189	0
C3	1	0.983051	1	0.970149	0.928571	0.945455	0.948276	0.982143	0.982759	0.982759	0.983607	0.963636	0.982759	0.981132	0.931034	0.932203	0.931034	0.949153	0.927273	0.925	0.836364	0.782609	0
C4	0.982759	0.965517	0.983871	1	0.965517	1	1	0.982143	0.982759	1	1	0.982143	0.982759	1	1	1	0.983607	0.949153	0.964912	1	0.95082	0.923077	0.862745	0
C5	0.965517	0.983333	1	1	0.983333	0.964912	1	0.964286	0.983051	0.983051	0.983871	0.964286	0.983051	0.981481	1	1	0.983871	0.983871	0.965517	1	0.968254	0.944444	0.964912	0.770833	0
Dissimilarity calculated from data file: sesame8_single.var (type:'single')
User selection Units: 25/25 and Variables: 356/356
Dissimilarity index: Presence / Absence - Jaccard
Missing data options:
No missing data
1000 bootstraps
----------------------------
@DARwin 5.0 - DIS - BOOTSTRAP
1000
Bootstrap #4
0.813559
0.82	0.936508
0.95082	0.971429	0.966102
0.904762	0.884058	0.984615	0.854839
0.952381	0.942857	0.913793	0.903226	0.859375
0.87931	0.876923	0.931034	0.953125	0.925373	0.673077
1	0.913793	1	0.903846	0.931034	0.927273	0.816327
1	1	0.918367	0.925926	0.95	0.983051	1	0.911111
0.981132	0.966667	0.98	0.923077	0.948276	0.964286	0.944444	0.880952	0.857143
0.968254	0.957143	0.983607	0.919355	0.941176	0.970149	0.920635	0.925926	0.982759	0.787234
0.962963	0.984127	1	0.982456	0.967213	1	1	0.957447	1	0.909091	0.886792
0.981818	0.967742	0.980769	0.964286	1	0.965517	0.982759	0.911111	1	0.933333	0.946429	0.888889
1	1	1	1	0.985075	1	1	1	0.981482	1	1	1	1
0.971429	0.987342	0.985294	0.986301	0.987179	0.914286	0.943662	1	0.984615	0.95082	0.928571	0.952381	0.96875	0.775862
0.970588	0.973684	0.953125	0.956522	0.915493	0.942857	0.942029	0.967213	0.967742	0.931034	0.942029	1	0.933333	0.921875	0.873239
0.967213	1	1	0.951613	0.955224	1	1	0.923077	0.982143	0.921569	0.96875	0.963636	0.944444	0.872727	0.84127	0.836066
0.985507	1	0.984849	0.956522	0.945206	0.957746	0.986111	0.967213	0.967742	1	1	0.984127	0.967742	0.921875	0.918919	0.901408	0.816667
0.967742	0.985915	0.948276	1	0.985714	0.969697	0.969231	0.982143	0.964286	0.962963	1	0.964286	0.982456	0.983871	0.878788	0.857143	0.934426	0.819672
1	1	0.97561	1	0.980392	0.934783	0.933333	1	0.973684	1	1	1	0.945946	0.976744	1	0.980769	0.977778	0.980769	0.931818
0.966667	1	0.982759	0.95082	0.954545	0.918033	0.934426	0.981482	0.981818	1	1	1	0.962963	0.929825	0.985915	0.970588	0.983871	0.90625	0.95082	0.875
1	1	1	0.947368	1	0.892857	0.983333	1	0.938775	1	1	1	1	0.944444	1	0.96875	0.927273	0.821429	0.965517	0.975	0.884615
1	1	1	0.945454	0.913793	0.928571	0.927273	0.979167	0.979592	1	0.982759	0.979592	1	0.981482	0.96875	0.933333	0.903846	0.896552	0.964286	0.885714	0.88	0.731707
0.945454	0.952381	0.942308	1	0.984375	1	1	1	1	1	1	1	0.980392	1	1	1	0.946429	0.918033	0.965517	1	0.925926	0.875	0.844445
0.981818	0.967742	1	1	1	0.947368	1	1	0.958333	0.956522	0.982759	0.979592	1	0.981482	1	1	1	0.984127	0.964286	1	1	0.916667	0.979592	0.790698
Bootstrap #3
0.813559
0.82	0.936508
0.95082	0.971429	0.966102
0.904762	0.884058	0.984615	0.854839
0.952381	0.942857	0.913793	0.903226	0.859375
0.87931	0.876923	0.931034	0.953125	0.925373	0.673077
1	0.913793	1	0.903846	0.931034	0.927273	0.816327
1	1	0.918367	0.925926	0.95	0.983051	1	0.911111
0.981132	0.966667	0.98	0.923077	0.948276	0.964286	0.944444	0.880952	0.857143
0.968254	0.957143	0.983607	0.919355	0.941176	0.970149	0.920635	0.925926	0.982759	0.787234
0.962963	0.984127	1	0.982456	0.967213	1	1	0.957447	1	0.909091	0.886792
0.981818	0.967742	0.980769	0.964286	1	0.965517	0.982759	0.911111	1	0.933333	0.946429	0.888889
1	1	1	1	0.985075	1	1	1	0.981482	1	1	1	1
0.971429	0.987342	0.985294	0.986301	0.987179	0.914286	0.943662	1	0.984615	0.95082	0.928571	0.952381	0.96875	0.775862
0.970588	0.973684	0.953125	0.956522	0.915493	0.942857	0.942029	0.967213	0.967742	0.931034	0.942029	1	0.933333	0.921875	0.873239
0.967213	1	1	0.951613	0.955224	1	1	0.923077	0.982143	0.921569	0.96875	0.963636	0.944444	0.872727	0.84127	0.836066
0.985507	1	0.984849	0.956522	0.945206	0.957746	0.986111	0.967213	0.967742	1	1	0.984127	0.967742	0.921875	0.918919	0.901408	0.816667
0.967742	0.985915	0.948276	1	0.985714	0.969697	0.969231	0.982143	0.964286	0.962963	1	0.964286	0.982456	0.983871	0.878788	0.857143	0.934426	0.819672
1	1	0.97561	1	0.980392	0.934783	0.933333	1	0.973684	1	1	1	0.945946	0.976744	1	0.980769	0.977778	0.980769	0.931818
0.966667	1	0.982759	0.95082	0.954545	0.918033	0.934426	0.981482	0.981818	1	1	1	0.962963	0.929825	0.985915	0.970588	0.983871	0.90625	0.95082	0.875
1	1	1	0.947368	1	0.892857	0.983333	1	0.938775	1	1	1	1	0.944444	1	0.96875	0.927273	0.821429	0.965517	0.975	0.884615
1	1	1	0.945454	0.913793	0.928571	0.927273	0.979167	0.979592	1	0.982759	0.979592	1	0.981482	0.96875	0.933333	0.903846	0.896552	0.964286	0.885714	0.88	0.731707
0.945454	0.952381	0.942308	1	0.984375	1	1	1	1	1	1	1	0.980392	1	1	1	0.946429	0.918033	0.965517	1	0.925926	0.875	0.844445
0.981818	0.967742	1	1	1	0.947368	1	1	0.958333	0.956522	0.982759	0.979592	1	0.981482	1	1	1	0.984127	0.964286	1	1	0.916667	0.979592	0.790698
Bootstrap #2
0.813559
0.82	0.936508
0.95082	0.971429	0.966102
0.904762	0.884058	0.984615	0.854839
0.952381	0.942857	0.913793	0.903226	0.859375
0.87931	0.876923	0.931034	0.953125	0.925373	0.673077
1	0.913793	1	0.903846	0.931034	0.927273	0.816327
1	1	0.918367	0.925926	0.95	0.983051	1	0.911111
0.981132	0.966667	0.98	0.923077	0.948276	0.964286	0.944444	0.880952	0.857143
0.968254	0.957143	0.983607	0.919355	0.941176	0.970149	0.920635	0.925926	0.982759	0.787234
0.962963	0.984127	1	0.982456	0.967213	1	1	0.957447	1	0.909091	0.886792
0.981818	0.967742	0.980769	0.964286	1	0.965517	0.982759	0.911111	1	0.933333	0.946429	0.888889
1	1	1	1	0.985075	1	1	1	0.981482	1	1	1	1
0.971429	0.987342	0.985294	0.986301	0.987179	0.914286	0.943662	1	0.984615	0.95082	0.928571	0.952381	0.96875	0.775862
0.970588	0.973684	0.953125	0.956522	0.915493	0.942857	0.942029	0.967213	0.967742	0.931034	0.942029	1	0.933333	0.921875	0.873239
0.967213	1	1	0.951613	0.955224	1	1	0.923077	0.982143	0.921569	0.96875	0.963636	0.944444	0.872727	0.84127	0.836066
0.985507	1	0.984849	0.956522	0.945206	0.957746	0.986111	0.967213	0.967742	1	1	0.984127	0.967742	0.921875	0.918919	0.901408	0.816667
0.967742	0.985915	0.948276	1	0.985714	0.969697	0.969231	0.982143	0.964286	0.962963	1	0.964286	0.982456	0.983871	0.878788	0.857143	0.934426	0.819672
1	1	0.97561	1	0.980392	0.934783	0.933333	1	0.973684	1	1	1	0.945946	0.976744	1	0.980769	0.977778	0.980769	0.931818
0.966667	1	0.982759	0.95082	0.954545	0.918033	0.934426	0.981482	0.981818	1	1	1	0.962963	0.929825	0.985915	0.970588	0.983871	0.90625	0.95082	0.875
1	1	1	0.947368	1	0.892857	0.983333	1	0.938775	1	1	1	1	0.944444	1	0.96875	0.927273	0.821429	0.965517	0.975	0.884615
1	1	1	0.945454	0.913793	0.928571	0.927273	0.979167	0.979592	1	0.982759	0.979592	1	0.981482	0.96875	0.933333	0.903846	0.896552	0.964286	0.885714	0.88	0.731707
0.945454	0.952381	0.942308	1	0.984375	1	1	1	1	1	1	1	0.980392	1	1	1	0.946429	0.918033	0.965517	1	0.925926	0.875	0.844445
0.981818	0.967742	1	1	1	0.947368	1	1	0.958333	0.956522	0.982759	0.979592	1	0.981482	1	1	1	0.984127	0.964286	1	1	0.916667	0.979592	0.790698
Bootstrap #1
0.813559
0.82	0.936508
0.95082	0.971429	0.966102
0.904762	0.884058	0.984615	0.854839
0.952381	0.942857	0.913793	0.903226	0.859375
0.87931	0.876923	0.931034	0.953125	0.925373	0.673077
1	0.913793	1	0.903846	0.931034	0.927273	0.816327
1	1	0.918367	0.925926	0.95	0.983051	1	0.911111
0.981132	0.966667	0.98	0.923077	0.948276	0.964286	0.944444	0.880952	0.857143
0.968254	0.957143	0.983607	0.919355	0.941176	0.970149	0.920635	0.925926	0.982759	0.787234
0.962963	0.984127	1	0.982456	0.967213	1	1	0.957447	1	0.909091	0.886792
0.981818	0.967742	0.980769	0.964286	1	0.965517	0.982759	0.911111	1	0.933333	0.946429	0.888889
1	1	1	1	0.985075	1	1	1	0.981482	1	1	1	1
0.971429	0.987342	0.985294	0.986301	0.987179	0.914286	0.943662	1	0.984615	0.95082	0.928571	0.952381	0.96875	0.775862
0.970588	0.973684	0.953125	0.956522	0.915493	0.942857	0.942029	0.967213	0.967742	0.931034	0.942029	1	0.933333	0.921875	0.873239
0.967213	1	1	0.951613	0.955224	1	1	0.923077	0.982143	0.921569	0.96875	0.963636	0.944444	0.872727	0.84127	0.836066
0.985507	1	0.984849	0.956522	0.945206	0.957746	0.986111	0.967213	0.967742	1	1	0.984127	0.967742	0.921875	0.918919	0.901408	0.816667
0.967742	0.985915	0.948276	1	0.985714	0.969697	0.969231	0.982143	0.964286	0.962963	1	0.964286	0.982456	0.983871	0.878788	0.857143	0.934426	0.819672
1	1	0.97561	1	0.980392	0.934783	0.933333	1	0.973684	1	1	1	0.945946	0.976744	1	0.980769	0.977778	0.980769	0.931818
0.966667	1	0.982759	0.95082	0.954545	0.918033	0.934426	0.981482	0.981818	1	1	1	0.962963	0.929825	0.985915	0.970588	0.983871	0.90625	0.95082	0.875
1	1	1	0.947368	1	0.892857	0.983333	1	0.938775	1	1	1	1	0.944444	1	0.96875	0.927273	0.821429	0.965517	0.975	0.884615
1	1	1	0.945454	0.913793	0.928571	0.927273	0.979167	0.979592	1	0.982759	0.979592	1	0.981482	0.96875	0.933333	0.903846	0.896552	0.964286	0.885714	0.88	0.731707
0.945454	0.952381	0.942308	1	0.984375	1	1	1	1	1	1	1	0.980392	1	1	1	0.946429	0.918033	0.965517	1	0.925926	0.875	0.844445
0.981818	0.967742	1	1	1	0.947368	1	1	0.958333	0.956522	0.982759	0.979592	1	0.981482	1	1	1	0.984127	0.964286	1	1	0.916667	0.979592	0.790698
Bootstrap #8
0.890909
0.886792	0.866667
0.949152	0.890625	0.868852
0.959184	0.928571	0.982456	0.890909
0.890909	0.939394	0.9375	0.890625	0.846154
0.90566	0.919355	0.87931	0.9375	0.924528	0.686275
0.943396	0.916667	1	0.935484	0.962264	0.818182	0.807692
1	0.96875	0.857143	0.919355	0.943396	0.96875	0.967213	0.929825
0.941176	0.983871	0.948276	0.933333	0.94	0.932203	0.965517	0.925926	0.886792
0.921569	0.967742	0.949152	0.87931	0.961538	0.967742	0.948276	0.964912	0.947368	0.836735
0.964286	1	1	0.953846	0.963636	1	1	0.983607	1	0.965517	0.87037
0.981818	0.951613	1	1	1	0.934426	0.983607	0.846154	1	0.964286	0.982759	0.872727
0.98	1	0.964286	1	0.958333	1	0.963636	1	0.962963	1	0.961538	1	1
0.979592	1	0.982143	0.983051	1	0.907407	0.962963	1	0.962264	0.96	0.980769	0.923077	1	0.833333
0.983333	0.970588	0.953846	0.985714	0.947368	0.870968	0.901639	1	0.918033	0.983871	1	1	0.968254	0.909091	0.927273
0.929825	1	0.985075	1	0.965517	1	0.984849	0.934426	0.96875	0.983871	1	0.984849	0.916667	0.888889	0.946429	0.888889
0.983333	1	1	1	0.947368	1	1	0.934426	0.952381	0.983871	1	0.984849	0.968254	0.909091	0.927273	0.939394	0.75
0.983607	1	0.954545	1	1	1	1	0.952381	0.919355	0.933333	1	0.885246	0.984615	0.948276	0.867924	0.890625	0.940299	0.854839
1	1	1	1	1	1	1	1	0.947368	1	1	1	0.945946	0.9375	1	0.952381	0.9	0.9	0.953488
0.982143	1	0.984127	0.984849	0.981818	0.918033	0.95	0.929825	0.966667	1	1	0.983871	0.948276	0.923077	0.981482	0.952381	0.918033	0.9	0.969231	0.888889
1	1	1	0.984375	1	0.967742	0.983333	1	0.909091	1	0.982456	0.983333	1	0.92	0.980769	0.95082	0.896552	0.877193	0.934426	0.882353	0.77551
1	0.964286	1	0.982759	0.956522	0.964286	0.942308	0.980769	0.961538	1	1	0.981482	0.980769	0.956522	0.955556	0.925926	0.925926	0.945454	0.886792	0.933333	0.851064	0.818182
0.981132	0.967213	0.983333	1	1	1	1	1	0.982759	1	1	1	1	1	1	1	0.983871	0.932203	0.967742	1	0.946429	0.944444	0.891304
0.965517	0.970149	1	1	1	0.938461	1	0.95082	0.984375	0.983607	1	1	0.95082	0.982759	1	1	0.970149	1	0.970588	1	0.934426	0.983871	0.963636	0.76
Bootstrap #7
0.888889
0.851852	0.807018
0.926471	0.917808	0.905405
0.886792	0.951613	1	0.835821
0.947368	0.918033	0.985075	0.871429	0.87931
0.96875	0.925373	0.927536	0.924051	0.924242	0.690909
0.949152	0.9375	1	0.92	0.883333	0.740741	0.786885
1	0.967213	0.859649	0.882353	0.966667	0.932203	0.938461	0.898305
0.954545	0.913044	0.915493	0.9	0.911765	0.897059	0.92	0.815385	0.736842
1	0.9	0.903226	0.902778	0.934426	0.935484	0.925373	0.903226	0.894737	0.728814
0.981482	0.966102	1	0.972222	0.965517	0.983333	0.984849	0.913793	0.982456	0.90625	0.890909
1	0.966102	0.983871	0.957746	1	0.966102	0.936508	0.913793	0.982456	0.955224	0.966102	0.857143
0.962264	0.948276	0.983871	1	0.965517	1	0.984849	1	0.964286	1	0.983333	1	1
0.884615	0.95082	0.935484	0.973333	1	0.95082	0.985507	1	0.983333	0.971831	0.984127	0.964912	1	0.770833
0.931034	0.953846	0.939394	0.948052	0.936508	0.903226	0.942857	0.970588	0.916667	0.945206	0.9375	1	1	0.894737	0.881356
0.942029	1	0.961538	0.966292	0.945946	1	1	0.961538	0.944444	0.926829	0.946667	0.972222	0.986301	0.84375	0.884058	0.808824
0.951613	1	1	0.987952	0.955224	0.985714	0.986842	0.971831	0.969697	0.974359	1	0.984615	0.935484	0.9	0.921875	0.926471	0.764706
0.94	0.946429	0.929825	1	1	1	1	0.983333	0.943396	0.969697	1	0.961538	1	0.941176	0.86	0.803922	0.956522	0.769231
1	1	1	1	1	1	0.913793	1	0.961538	1	1	1	0.938775	0.96	1	0.964912	0.939394	0.931034	0.958333
0.985294	0.958333	1	0.952381	0.927536	0.928571	0.934211	0.95946	0.971429	1	1	0.985507	0.970588	0.888889	0.957143	0.930556	0.939759	0.933333	0.953846	0.881356
1	1	1	0.972603	1	0.949152	0.969697	1	0.964912	1	1	0.982143	1	0.963636	0.983051	0.933333	0.913044	0.883333	0.921569	0.895833	0.732143
1	0.984127	1	0.973333	0.913793	0.915254	0.923077	0.952381	0.966102	1	1	0.982759	0.982759	0.964912	0.949152	0.918033	0.915493	0.938461	0.924528	0.829787	0.762712	0.77551
0.960784	0.964912	0.966102	1	0.945454	1	1	0.983333	1	1	1	0.981132	0.961538	1	1	1	0.971429	0.933333	0.980392	1	0.920635	0.854167	0.836735
0.979592	0.943396	1	1	0.981482	0.981818	1	0.982456	1	1	1	0.98	1	0.98	1	1	0.985294	0.983333	0.979167	1	0.968254	0.916667	0.961538	0.804878
Bootstrap #6
0.927273
0.945454	0.927273
0.918033	0.901639	0.935484
0.921569	0.943396	0.981482	0.875
0.962963	0.882353	0.981818	0.814815	0.738095
0.894737	0.915254	0.833333	0.907692	0.909091	0.702128
0.964912	0.888889	1	0.883333	0.88	0.836735	0.836364
1	0.949152	0.910714	0.921875	0.925926	0.946429	0.984615	0.830189
0.964912	0.965517	0.964912	0.969231	0.962963	0.963636	0.95082	0.867924	0.784314
0.833333	0.924528	0.981818	0.896552	0.960784	0.941176	0.910714	0.903846	0.946429	0.86
0.927273	0.983051	1	1	0.943396	1	1	0.928571	1	0.965517	0.882353
0.982759	1	0.982759	1	1	0.963636	0.95082	0.947368	1	0.983051	1	0.888889
0.982456	0.964912	0.945454	0.96875	0.981482	1	0.95	1	0.983333	1	0.981818	1	1
0.971429	1	0.985915	0.947368	0.985294	0.955224	0.986842	1	0.958333	0.926471	0.970588	0.910448	1	0.779661
1	1	0.962963	0.95082	0.960784	0.961538	1	0.982143	0.927273	0.924528	0.941176	1	0.982143	0.833333	0.852459
0.953125	0.969697	0.936508	0.943662	0.967742	1	0.956522	0.985075	0.955224	0.920635	0.951613	0.969697	0.985075	0.844828	0.826087	0.773585
0.966102	1	0.983333	0.985294	0.982456	0.964912	0.96875	0.966667	0.95082	0.983607	1	0.966667	0.912281	0.929825	0.880597	0.946429	0.833333
0.982759	1	0.982759	1	1	0.982143	0.984127	1	0.949152	0.909091	1	1	0.983051	0.964912	0.84127	0.903846	0.920635	0.912281
1	1	0.97561	1	0.973684	0.947368	0.955556	1	0.977273	1	1	1	0.951219	0.97561	1	0.974359	0.98	0.977273	0.951219
1	0.970149	0.9375	1	0.934426	0.935484	0.910448	0.970149	0.985714	1	1	0.921875	1	0.9375	0.861111	0.952381	0.915493	0.955882	0.938461	0.916667
1	1	1	1	1	0.981482	1	1	0.983051	1	1	0.90566	1	0.982143	0.924242	0.981482	0.952381	0.947368	0.90566	0.975	0.781818
1	0.983051	1	1	0.923077	0.963636	0.967742	0.965517	0.983607	0.983051	0.982143	0.888889	1	0.982759	0.84127	0.944444	0.920635	0.983607	0.867924	0.951219	0.767857	0.73913
1	1	1	1	0.961538	1	1	0.982456	1	1	1	0.982456	0.982456	1	1	1	1	1	1	1	0.919355	0.923077	0.90566
0.95082	1	1	1	0.983333	0.983607	1	0.984375	0.984849	0.984375	0.949152	0.934426	1	0.984127	1	1	1	1	1	1	1	0.967213	0.984375	0.6875
Bootstrap #12
0.886792
0.910714	0.931034
0.897059	0.972973	0.852941
0.931034	0.95	0.968254	0.820896
0.983871	0.896552	0.952381	0.888889	0.919355
0.985075	0.887097	0.955882	0.975904	0.875	0.568627
0.981482	0.808511	1	0.956522	0.946429	0.77551	0.75
1	0.866667	0.852459	0.923077	0.955882	0.971429	0.95946	0.877193
0.951613	0.881356	0.920635	0.921053	0.954545	0.852459	0.880597	0.76	0.786885
0.9375	0.904762	0.907692	0.835616	0.971429	0.910448	0.885714	0.859649	0.915493	0.684211
0.945454	1	1	0.958333	0.983607	0.983871	0.985075	0.921569	0.984849	0.968254	0.903226
0.982759	1	1	1	1	0.933333	0.938461	0.962963	0.985075	0.952381	0.970149	0.865385
1	1	1	0.984127	0.98	1	1	1	1	1	1	1	1
0.936508	0.969697	0.90625	0.909091	1	0.971429	0.973333	1	0.929577	0.911765	0.930556	0.953125	0.985075	0.727273
0.96875	0.969231	0.938461	0.975309	0.90625	0.955882	0.898551	0.983871	0.943662	0.942029	0.944444	1	0.984849	0.9	0.846154
0.928571	0.983333	0.95	0.945206	0.967742	1	0.985507	0.982143	0.970149	0.953125	0.955224	1	0.983333	0.886364	0.830508	0.785714
0.963636	1	1	0.957746	0.983333	0.949152	0.969231	0.981132	0.984615	0.984127	1	0.982143	0.964286	0.954545	0.9	0.951613	0.770833
0.951613	0.96875	0.920635	1	1	0.955224	0.958333	1	0.972222	0.971429	1	0.984375	0.984615	0.981132	0.84375	0.859375	0.919355	0.933333
1	1	1	1	1	0.9375	0.901961	1	1	1	1	1	0.955556	1	1	1	0.933333	0.928571	0.94
0.969231	1	0.985507	1	0.890625	0.925373	0.915493	0.967742	1	1	1	0.953125	1	0.981818	0.914286	0.972603	0.904762	0.918033	0.927536	0.854167
1	1	1	0.986111	1	0.983333	1	1	0.984375	1	0.984615	0.943396	1	0.977273	0.951613	1	0.925926	0.829787	0.967213	0.926829	0.859649
1	0.985075	1	0.987952	0.816667	0.956522	0.915493	0.967742	1	0.986301	1	0.953125	0.969697	1	0.929577	0.913044	0.970149	0.984615	0.895522	0.981482	0.754098	0.859649
1	0.918033	1	1	0.921875	1	1	1	0.927536	1	1	1	0.952381	1	1	1	1	0.984127	0.925373	1	0.895522	0.983871	0.806452
0.941176	1	1	1	1	1	1	1	0.95	0.948276	0.967742	0.961538	1	1	1	1	0.981818	0.980769	0.910714	1	1	0.980392	0.932203	0.803922
Bootstrap #10
0.886792
0.910714	0.931034
0.897059	0.972973	0.852941
0.931034	0.95	0.968254	0.820896
0.983871	0.896552	0.952381	0.888889	0.919355
0.985075	0.887097	0.955882	0.975904	0.875	0.568627
0.981482	0.808511	1	0.956522	0.946429	0.77551	0.75
1	0.866667	0.852459	0.923077	0.955882	0.971429	0.95946	0.877193
0.951613	0.881356	0.920635	0.921053	0.954545	0.852459	0.880597	0.76	0.786885
0.9375	0.904762	0.907692	0.835616	0.971429	0.910448	0.885714	0.859649	0.915493	0.684211
0.945454	1	1	0.958333	0.983607	0.983871	0.985075	0.921569	0.984849	0.968254	0.903226
0.982759	1	1	1	1	0.933333	0.938461	0.962963	0.985075	0.952381	0.970149	0.865385
1	1	1	0.984127	0.98	1	1	1	1	1	1	1	1
0.936508	0.969697	0.90625	0.909091	1	0.971429	0.973333	1	0.929577	0.911765	0.930556	0.953125	0.985075	0.727273
0.96875	0.969231	0.938461	0.975309	0.90625	0.955882	0.898551	0.983871	0.943662	0.942029	0.944444	1	0.984849	0.9	0.846154
0.928571	0.983333	0.95	0.945206	0.967742	1	0.985507	0.982143	0.970149	0.953125	0.955224	1	0.983333	0.886364	0.830508	0.785714
0.963636	1	1	0.957746	0.983333	0.949152	0.969231	0.981132	0.984615	0.984127	1	0.982143	0.964286	0.954545	0.9	0.951613	0.770833
0.951613	0.96875	0.920635	1	1	0.955224	0.958333	1	0.972222	0.971429	1	0.984375	0.984615	0.981132	0.84375	0.859375	0.919355	0.933333
1	1	1	1	1	0.9375	0.901961	1	1	1	1	1	0.955556	1	1	1	0.933333	0.928571	0.94
0.969231	1	0.985507	1	0.890625	0.925373	0.915493	0.967742	1	1	1	0.953125	1	0.981818	0.914286	0.972603	0.904762	0.918033	0.927536	0.854167
1	1	1	0.986111	1	0.983333	1	1	0.984375	1	0.984615	0.943396	1	0.977273	0.951613	1	0.925926	0.829787	0.967213	0.926829	0.859649
1	0.985075	1	0.987952	0.816667	0.956522	0.915493	0.967742	1	0.986301	1	0.953125	0.969697	1	0.929577	0.913044	0.970149	0.984615	0.895522	0.981482	0.754098	0.859649
1	0.918033	1	1	0.921875	1	1	1	0.927536	1	1	1	0.952381	1	1	1	1	0.984127	0.925373	1	0.895522	0.983871	0.806452
0.941176	1	1	1	1	1	1	1	0.95	0.948276	0.967742	0.961538	1	1	1	1	0.981818	0.980769	0.910714	1	1	0.980392	0.932203	0.803922
Bootstrap #16
0.82
0.790323	0.774193
0.833333	0.857143	0.873239
0.94	0.941176	0.985507	0.884615
0.980769	0.981132	0.970588	0.84	0.883721
0.86	0.945454	0.878788	0.949152	0.96	0.818182
0.979592	0.98	1	0.9	0.928571	0.902439	0.911111
1	0.931034	0.885714	0.9	0.901961	0.943396	0.965517	0.87234
1	0.921569	0.907692	0.964912	1	1	0.94	0.930233	0.674419
0.964912	0.983051	0.958904	0.967742	0.961538	0.981132	0.945454	0.98	0.912281	0.877551
1	1	1	1	0.945946	1	1	0.941176	1	0.974359	0.953488
1	0.968254	0.974684	0.985294	1	0.843137	0.854545	0.857143	1	0.947368	0.984375	0.913044
1	0.963636	1	0.966102	0.98	1	1	1	0.964912	1	1	1	1
0.983051	0.983333	0.986842	0.968254	0.962264	0.962264	1	1	0.983871	0.943396	0.948276	0.904762	0.984615	0.681818
0.983051	0.966102	0.973333	0.951613	0.962264	0.942308	0.982759	1	0.913793	0.901961	0.929825	1	0.952381	0.862745	0.872727
0.944444	0.982456	0.972222	0.983607	0.980392	1	0.981818	0.979167	0.909091	0.94	0.945454	1	0.983871	0.877551	0.946429	0.843137
1	1	0.987952	1	0.983607	0.912281	0.918033	0.964912	0.955224	1	1	1	0.893939	0.951613	0.938461	0.954545	0.842105
0.983871	0.984127	0.933333	1	0.982456	1	1	0.962264	0.935484	0.946429	1	0.979167	1	0.929825	0.87931	0.934426	0.966667	0.857143
1	1	0.983607	1	0.974359	0.974359	1	1	0.956522	1	1	1	0.9375	0.951219	1	0.955556	0.952381	0.961538	0.958333
0.95082	0.968254	0.974684	0.985294	0.964912	0.964912	0.967213	1	0.969231	1	1	0.979592	1	0.931034	0.984615	0.952381	0.95	0.957143	0.970149	0.866667
1	1	1	0.984127	1	0.981132	0.982456	1	0.966667	1	0.965517	0.977273	1	0.963636	0.983333	0.948276	0.964286	0.969697	0.95082	0.904762	0.818182
1	0.983051	1	0.984127	0.941176	0.981132	0.982456	1	0.966667	1	0.965517	0.928571	1	0.963636	0.929825	0.948276	0.945454	0.969697	0.915254	0.878049	0.839286	0.695652
0.964286	0.964912	0.972603	1	0.980769	1	1	1	1	1	1	1	0.967742	1	1	1	1	1	0.967213	1	0.967742	0.946429	0.843137
0.941176	1	1	1	1	1	1	1	0.944444	0.93617	1	1	1	0.96	1	1	0.94	1	0.964912	1	0.983051	0.962264	0.921569	0.772727
Bootstrap #14
0.82
0.790323	0.774193
0.833333	0.857143	0.873239
0.94	0.941176	0.985507	0.884615
0.980769	0.981132	0.970588	0.84	0.883721
0.86	0.945454	0.878788	0.949152	0.96	0.818182
0.979592	0.98	1	0.9	0.928571	0.902439	0.911111
1	0.931034	0.885714	0.9	0.901961	0.943396	0.965517	0.87234
1	0.921569	0.907692	0.964912	1	1	0.94	0.930233	0.674419
0.964912	0.983051	0.958904	0.967742	0.961538	0.981132	0.945454	0.98	0.912281	0.877551
1	1	1	1	0.945946	1	1	0.941176	1	0.974359	0.953488
1	0.968254	0.974684	0.985294	1	0.843137	0.854545	0.857143	1	0.947368	0.984375	0.913044
1	0.963636	1	0.966102	0.98	1	1	1	0.964912	1	1	1	1
0.983051	0.983333	0.986842	0.968254	0.962264	0.962264	1	1	0.983871	0.943396	0.948276	0.904762	0.984615	0.681818
0.983051	0.966102	0.973333	0.951613	0.962264	0.942308	0.982759	1	0.913793	0.901961	0.929825	1	0.952381	0.862745	0.872727
0.944444	0.982456	0.972222	0.983607	0.980392	1	0.981818	0.979167	0.909091	0.94	0.945454	1	0.983871	0.877551	0.946429	0.843137
1	1	0.987952	1	0.983607	0.912281	0.918033	0.964912	0.955224	1	1	1	0.893939	0.951613	0.938461	0.954545	0.842105
0.983871	0.984127	0.933333	1	0.982456	1	1	0.962264	0.935484	0.946429	1	0.979167	1	0.929825	0.87931	0.934426	0.966667	0.857143
1	1	0.983607	1	0.974359	0.974359	1	1	0.956522	1	1	1	0.9375	0.951219	1	0.955556	0.952381	0.961538	0.958333
0.95082	0.968254	0.974684	0.985294	0.964912	0.964912	0.967213	1	0.969231	1	1	0.979592	1	0.931034	0.984615	0.952381	0.95	0.957143	0.970149	0.866667
1	1	1	0.984127	1	0.981132	0.982456	1	0.966667	1	0.965517	0.977273	1	0.963636	0.983333	0.948276	0.964286	0.969697	0.95082	0.904762	0.818182
1	0.983051	1	0.984127	0.941176	0.981132	0.982456	1	0.966667	1	0.965517	0.928571	1	0.963636	0.929825	0.948276	0.945454	0.969697	0.915254	0.878049	0.839286	0.695652
0.964286	0.964912	0.972603	1	0.980769	1	1	1	1	1	1	1	0.967742	1	1	1	1	1	0.967213	1	0.967742	0.946429	0.843137
0.941176	1	1	1	1	1	1	1	0.944444	0.93617	1	1	1	0.96	1	1	0.94	1	0.964912	1	0.983051	0.962264	0.921569	0.772727
Bootstrap #5
0.843137
0.84127	0.875
0.903226	0.883333	0.808824
0.932203	0.872727	0.929577	0.924242
0.923077	0.962264	0.868852	0.896552	0.82
0.929825	0.965517	0.861538	0.954545	0.896552	0.733333
0.983871	0.949152	1	0.955882	0.952381	0.927273	0.896552
1	0.948276	0.943662	0.955224	0.87931	1	0.95	0.87931
0.960784	1	0.96875	0.966102	0.981818	0.979167	0.92	0.833333	0.829787
0.935484	1	0.946667	0.911765	0.970149	1	0.969231	0.985294	0.920635	0.843137
0.966667	1	1	0.985507	0.968254	1	1	0.916667	1	0.981482	0.903226
0.983051	0.964912	0.957143	0.969697	1	0.923077	0.929825	0.833333	1	0.94	0.984615	0.872727
0.980392	0.98	0.968254	0.965517	1	1	0.960784	1	1	1	0.982456	1	1
0.966102	0.983051	0.972222	0.954545	0.984127	0.944444	0.949152	1	0.967213	0.92	0.936508	0.967213	0.983333	0.822222
0.966102	0.983051	0.927536	0.938461	0.933333	0.982143	0.966667	0.984127	0.913793	0.897959	0.919355	1	0.948276	0.94	0.892857
0.966667	1	0.943662	0.985507	0.984375	1	0.967213	0.968254	0.95082	0.9	0.9375	0.984127	0.966667	0.92	0.875	0.894737
0.983051	1	0.971831	1	1	0.981818	0.983333	0.913793	0.983607	1	1	0.966667	0.947368	0.938775	0.929825	0.929825	0.807692
0.967742	0.983871	0.95946	1	0.969231	0.965517	0.968254	0.953125	0.952381	0.963636	1	0.984615	0.984127	1	0.898305	0.859649	0.96875	0.836364
1	1	0.96	1	0.95	0.870968	0.947368	1	1	1	1	1	1	1	1	1	0.975	0.973684	0.951219
0.984849	0.984615	0.947368	0.972603	0.939394	0.854545	0.903226	0.955224	1	1	1	1	0.953125	0.946429	0.969697	0.969697	0.938461	0.969231	0.955882	0.820513
1	1	1	0.981482	1	0.97619	0.978723	1	0.979167	1	0.980769	1	1	1	1	0.978723	0.934783	0.880952	0.9375	0.916667	0.92
1	1	1	0.983871	0.925926	0.959184	0.943396	0.982456	1	0.978723	0.983333	0.982143	0.942308	1	0.962963	0.943396	0.944444	0.962264	0.946429	0.9375	0.872727	0.764706
0.983333	0.965517	0.986301	1	0.967742	1	1	0.984127	0.983871	1	1	0.983871	1	1	1	1	0.967213	0.910714	0.984375	1	0.9375	0.883721	0.857143
0.965517	1	1	1	0.983871	0.962963	1	0.95	0.983607	0.980769	0.96875	0.949152	0.965517	0.980392	1	1	1	0.983051	0.984127	1	0.953125	0.955556	0.981482	0.849057
Bootstrap #11
0.886792
0.910714	0.931034
0.897059	0.972973	0.852941
0.931034	0.95	0.968254	0.820896
0.983871	0.896552	0.952381	0.888889	0.919355
0.985075	0.887097	0.955882	0.975904	0.875	0.568627
0.981482	0.808511	1	0.956522	0.946429	0.77551	0.75
1	0.866667	0.852459	0.923077	0.955882	0.971429	0.95946	0.877193
0.951613	0.881356	0.920635	0.921053	0.954545	0.852459	0.880597	0.76	0.786885
0.9375	0.904762	0.907692	0.835616	0.971429	0.910448	0.885714	0.859649	0.915493	0.684211
0.945454	1	1	0.958333	0.983607	0.983871	0.985075	0.921569	0.984849	0.968254	0.903226
0.982759	1	1	1	1	0.933333	0.938461	0.962963	0.985075	0.952381	0.970149	0.865385
1	1	1	0.984127	0.98	1	1	1	1	1	1	1	1
0.936508	0.969697	0.90625	0.909091	1	0.971429	0.973333	1	0.929577	0.911765	0.930556	0.953125	0.985075	0.727273
0.96875	0.969231	0.938461	0.975309	0.90625	0.955882	0.898551	0.983871	0.943662	0.942029	0.944444	1	0.984849	0.9	0.846154
0.928571	0.983333	0.95	0.945206	0.967742	1	0.985507	0.982143	0.970149	0.953125	0.955224	1	0.983333	0.886364	0.830508	0.785714
0.963636	1	1	0.957746	0.983333	0.949152	0.969231	0.981132	0.984615	0.984127	1	0.982143	0.964286	0.954545	0.9	0.951613	0.770833
0.951613	0.96875	0.920635	1	1	0.955224	0.958333	1	0.972222	0.971429	1	0.984375	0.984615	0.981132	0.84375	0.859375	0.919355	0.933333
1	1	1	1	1	0.9375	0.901961	1	1	1	1	1	0.955556	1	1	1	0.933333	0.928571	0.94
0.969231	1	0.985507	1	0.890625	0.925373	0.915493	0.967742	1	1	1	0.953125	1	0.981818	0.914286	0.972603	0.904762	0.918033	0.927536	0.854167
1	1	1	0.986111	1	0.983333	1	1	0.984375	1	0.984615	0.943396	1	0.977273	0.951613	1	0.925926	0.829787	0.967213	0.926829	0.859649
1	0.985075	1	0.987952	0.816667	0.956522	0.915493	0.967742	1	0.986301	1	0.953125	0.969697	1	0.929577	0.913044	0.970149	0.984615	0.895522	0.981482	0.754098	0.859649
1	0.918033	1	1	0.921875	1	1	1	0.927536	1	1	1	0.952381	1	1	1	1	0.984127	0.925373	1	0.895522	0.983871	0.806452
0.941176	1	1	1	1	1	1	1	0.95	0.948276	0.967742	0.961538	1	1	1	1	0.981818	0.980769	0.910714	1	1	0.980392	0.932203	0.803922
Bootstrap #9
0.969231
0.941176	0.880597
0.948276	0.935065	0.921875
0.959184	0.971429	0.982759	0.9
0.9375	0.956522	0.946429	0.842105	0.901961
0.943396	0.915493	0.896552	0.854839	0.929825	0.644444
0.956522	0.904762	1	0.894737	0.895833	0.795455	0.816327
1	0.938461	0.923077	0.913793	0.960784	0.94	0.964286	0.863636
0.978261	0.953846	0.942308	0.949152	0.938775	0.916667	0.963636	0.911111	0.833333
0.913793	0.923077	0.971015	0.916667	0.953846	0.953846	0.942029	0.934426	0.951613	0.814815
0.909091	0.954545	1	0.967213	0.918367	1	1	0.93617	1	0.911111	0.796296
1	0.926471	0.947368	0.969231	1	0.944444	0.949152	0.961538	1	0.94	0.954545	0.941176
1	0.983333	0.978723	0.981482	0.977273	1	0.979592	1	0.97561	1	0.944444	1	1
0.979592	1	0.982456	0.951613	0.981482	0.962264	0.983051	1	0.980392	0.9375	0.936508	0.938775	0.981818	0.810811
0.982759	0.987342	0.984849	0.927536	0.915254	0.896552	0.887097	0.983333	0.966102	0.928571	0.958904	1	0.951613	0.94	0.913793
0.926829	0.984375	0.980392	0.946429	0.957447	1	1	0.977778	0.954545	0.928571	0.966102	0.977778	1	0.914286	0.909091	0.882353
0.977778	1	0.981132	0.983333	0.9375	0.98	0.981818	1	0.978723	0.978261	1	1	0.916667	0.947368	0.888889	0.946429	0.871795
1	1	1	1	0.980392	1	1	1	0.886364	0.978723	1	0.934783	1	0.975	0.914894	0.928571	0.928571	0.880952
1	1	0.976744	1	0.975	0.975	1	1	0.972973	1	1	1	0.95	0.965517	1	0.979167	0.969697	0.971429	0.972222
0.962264	0.986667	0.983871	0.955224	0.965517	0.888889	0.934426	0.963636	0.982143	1	1	0.982143	0.983333	0.957447	0.927273	0.920635	0.960784	0.981482	0.962963	0.902439
1	1	1	0.951613	1	0.921569	0.947368	1	0.96	1	0.969231	0.980392	1	0.976744	0.981132	0.932203	0.978723	0.93617	0.914894	0.974359	0.795918
1	0.958333	1	0.954545	0.927273	0.927273	0.896552	0.981818	0.981818	0.981482	0.985714	0.962963	0.983051	0.978723	0.945454	0.883333	0.96	0.981132	0.942308	0.926829	0.833333	0.765957
1	0.985915	1	1	0.962963	1	1	0.960784	0.980769	1	1	0.960784	0.982143	1	1	1	1	0.959184	0.96	1	0.947368	0.921569	0.865385
0.901961	1	1	1	0.966102	0.966102	1	0.945454	0.982456	0.982143	0.957143	0.90566	0.983607	1	1	1	0.961538	0.962963	0.963636	1	0.984375	0.928571	0.984127	0.729167
Bootstrap #20
0.87234
0.854839	0.885246
0.852459	0.883333	0.866667
0.962264	0.980392	0.939394	0.810345
0.875	0.928571	0.901408	0.833333	0.830189
0.851064	0.891304	0.85	0.903226	0.960784	0.78
0.912281	0.886792	1	0.882353	0.929825	0.789474	0.867924
1	0.929825	0.855072	0.885714	0.913793	0.940299	0.966667	0.813559
0.938461	0.96875	0.909091	0.922078	0.9375	0.944444	0.953125	0.863636	0.796875
0.934426	0.912281	0.873239	0.902778	0.967742	0.956522	0.913793	0.890625	0.893939	0.8
0.956522	0.953488	1	1	0.978261	0.981482	0.977778	0.941176	0.981818	0.966102	0.924528
1	0.956522	0.96875	0.984375	1	0.90566	0.911111	0.882353	0.982759	0.933333	0.965517	0.925
1	1	0.956522	0.971015	1	1	0.942308	1	0.984375	1	0.96875	1	1
0.96875	0.983871	0.961538	0.933333	1	0.971831	0.984127	1	0.972222	0.887324	0.943662	0.982456	0.966102	0.759259
0.953125	0.984127	0.948718	0.948052	0.935484	0.972222	0.984375	0.971831	0.943662	0.90411	0.929577	1	0.949152	0.866667	0.833333
0.964912	1	0.986301	0.957143	0.964286	1	1	0.968254	0.969231	0.956522	0.953846	1	1	0.846154	0.85	0.793103
0.984849	1	0.987654	0.974684	0.96875	0.986301	1	1	0.986487	0.974359	1	1	0.966667	0.9375	0.9	0.945946	0.813559
0.983333	0.982456	0.944444	1	0.965517	1	1	1	0.954545	0.911765	1	1	1	0.949152	0.854839	0.875	0.967742	0.875
1	1	0.980392	1	0.971429	0.976744	1	1	0.977273	1	1	1	0.967742	0.972973	1	0.978723	0.974359	0.978723	0.97561
1	1	0.985507	1	0.941176	0.949152	1	0.966102	0.983871	1	1	0.978261	0.958333	0.923077	0.951613	0.984615	0.982456	0.935484	0.983051	0.909091
1	1	1	0.984849	1	0.947368	1	1	0.983333	1	0.983607	0.977273	1	0.961538	0.983871	0.984127	0.981818	0.836364	0.884615	0.9375	0.869565
1	1	1	0.984375	0.958333	0.982456	1	1	0.982759	0.95082	1	0.97619	1	0.980392	0.983333	0.983607	0.981132	0.966667	0.943396	0.933333	0.837209	0.702703
1	1	1	1	0.962264	1	1	1	1	1	1	1	1	1	1	1	1	0.953125	0.948276	1	0.942308	0.87234	0.785714
0.964912	1	1	1	1	0.935484	1	0.968254	1	1	0.985075	0.98	0.961538	0.983051	1	1	0.983607	0.955224	0.95082	1	0.964286	0.833333	0.941176	0.82
Bootstrap #15
0.913044
0.878788	0.916667
0.91358	0.902778	0.852941
0.917808	0.923077	0.970149	0.847222
0.909091	0.932203	0.931034	0.865672	0.864407
0.910448	0.896552	0.854545	0.930556	0.9375	0.755102
0.928571	0.9	1	0.946667	0.923077	0.764706	0.857143
1	0.980769	0.938775	0.9	0.924528	0.958333	1	0.847826
0.898551	0.969231	0.96875	0.933333	0.955882	0.877193	0.934426	0.803571	0.826087
0.887097	0.928571	0.964912	0.926471	0.967742	0.944444	0.925926	0.909091	0.955556	0.803922
0.915254	0.981482	1	1	0.927273	1	1	0.9	1	0.981818	0.886364
0.987013	0.921875	0.969697	0.987654	1	0.935484	0.936508	0.904762	1	0.939394	0.967213	0.925926
0.967742	1	0.961538	1	0.982759	1	0.960784	1	1	1	0.979167	1	1
0.971429	1	0.966667	0.972973	0.984849	0.983051	1	1	0.958333	0.933333	0.903846	0.980392	0.96875	0.7
0.958333	0.96875	0.968254	0.960526	0.939394	0.932203	0.915254	0.984615	0.980769	0.919355	0.947368	1	0.921875	0.962264	0.932203
0.962025	0.971831	0.971429	0.963855	0.973333	1	1	0.971831	1	0.972222	0.984849	0.983607	0.972973	0.872727	0.833333	0.910448
0.971831	1	0.983871	1	0.953846	0.983333	0.983607	0.95082	1	0.968254	1	0.960784	0.936508	0.895833	0.910714	0.95082	0.816667
0.984849	1	0.963636	1	1	0.981482	0.981818	0.982456	0.977273	0.946429	1	1	0.983333	0.978261	0.942308	0.925926	0.968254	0.923077
1	1	1	1	1	0.97619	0.952381	1	1	1	1	1	0.934783	1	1	1	0.980769	0.976744	0.972973
0.985075	1	1	0.971429	0.967213	0.88	0.924528	0.946429	1	1	1	1	0.966667	0.978723	0.962963	0.946429	0.96875	0.982143	0.959184	0.885714
1	1	1	0.971429	1	0.962963	0.963636	1	1	1	1	1	1	1	1	0.964912	0.935484	0.924528	0.98	0.916667	0.818182
1	1	1	0.973333	0.920635	0.948276	0.912281	0.984127	1	0.984375	0.982456	0.980769	0.969231	1	0.929825	0.915254	0.940299	0.983607	0.901961	0.952381	0.8125	0.787234
0.985294	0.983051	0.982759	1	0.967742	1	1	0.983051	1	1	1	0.979167	0.967213	1	1	1	0.984849	0.945454	0.938775	1	0.980769	0.960784	0.84
0.953125	1	1	1	0.983607	0.962264	1	0.945454	1	1	0.938775	0.906977	0.966102	0.978261	1	1	1	1	0.93617	1	0.914894	0.98	0.923077	0.818182
Bootstrap #24
0.821429
0.828125	0.887324
0.931507	0.891892	0.833333
0.934426	0.938461	0.96	0.875
0.87931	0.954545	0.852941	0.92	0.866667
0.87931	0.921875	0.852941	0.948052	0.9375	0.666667
0.967213	0.936508	1	0.946667	0.935484	0.821429	0.8
1	0.915254	0.859375	0.972973	0.932203	0.95	0.913793	0.890909
0.983051	0.915254	0.926471	0.929577	0.932203	0.932203	0.913793	0.826923	0.884615
0.931034	0.935484	0.972603	0.916667	0.934426	0.951613	0.916667	0.894737	0.965517	0.77551
0.982456	0.983607	1	1	0.983333	0.948276	0.948276	0.843137	0.943396	0.962963	0.90566
1	0.938461	0.973684	0.92	1	0.920635	0.903226	0.821429	0.95	0.913793	0.951613	0.849057
1	1	0.971429	1	0.983607	1	0.966667	1	0.944444	1	0.964912	1	1
1	1	0.985714	0.986301	1	1	1	1	0.962963	0.943396	0.945454	1	0.966102	0.75
0.966667	0.96875	0.943662	0.96	0.934426	0.951613	0.951613	0.967213	0.888889	0.928571	0.931034	1	0.916667	0.886792	0.90566
0.984615	0.985507	0.987179	0.962025	0.954545	1	0.985294	0.969231	0.95082	0.967742	0.96875	1	1	0.833333	0.784314	0.821429
1	1	0.987805	1	0.971831	1	1	0.955882	0.9375	1	1	0.96875	0.986111	0.844828	0.9	0.90625	0.806452
1	1	0.956522	1	0.983607	0.983607	0.983607	0.983051	0.882353	0.963636	1	1	1	0.923077	0.942308	0.82	0.932203	0.781818
1	1	0.983607	1	0.980392	0.96	0.96	1	0.931818	1	1	1	0.96	0.930233	1	0.934783	0.918367	0.924528	0.904762
1	1	0.974026	0.921053	0.954545	0.904762	0.938461	0.953125	0.95082	1	1	1	0.887097	0.894737	0.983607	0.935484	0.923077	0.878788	0.932203	0.767442
1	1	1	0.986842	1	0.95082	0.984127	1	0.927273	1	0.983333	1	1	0.884615	1	0.929825	0.934426	0.810345	0.862745	0.829268	0.75
1	0.981482	1	0.984849	0.961538	0.961538	0.961538	0.980392	0.934783	1	1	1	1	0.933333	0.955556	0.914894	0.9	0.946429	0.857143	0.774193	0.804348	0.780488
0.983333	0.951613	0.986301	1	0.967742	1	1	0.983607	0.964912	1	1	0.982143	0.984127	1	1	1	1	0.954545	0.90566	1	0.968254	0.928571	0.913044
0.966102	1	1	1	0.984127	0.933333	1	0.949152	1	1	0.983333	0.963636	0.967742	1	1	1	0.984375	0.954545	0.90566	1	0.916667	0.909091	0.958333	0.75
Bootstrap #18
0.854839
0.881356	0.901639
0.816667	0.892308	0.864407
0.969697	0.985294	0.95082	0.887097
0.883333	0.903226	0.875	0.847458	0.898305
0.892308	0.822581	0.903226	0.910448	0.870968	0.673077
0.925373	0.859375	1	0.893939	0.939394	0.830508	0.766667
1	0.984127	0.907407	0.95082	0.929825	1	0.968254	0.934426
0.966102	0.949152	0.982143	0.931034	0.886792	0.925926	0.913793	0.833333	0.92
0.842105	0.883333	1	0.844828	0.915254	0.894737	0.903226	0.827586	1	0.86
0.935484	0.984849	1	1	0.915254	1	1	0.903226	1	0.963636	0.872727
0.952381	0.936508	0.983607	0.969231	1	0.95	0.9375	0.920635	1	0.944444	0.983607	0.872727
1	1	0.981132	1	0.943396	1	0.983051	1	0.98	1	1	1	1
0.929825	0.966667	0.963636	0.966667	0.964912	0.964286	0.983871	1	0.961538	0.96	0.924528	0.944444	0.982143	0.833333
0.941176	0.942029	0.9375	0.986111	0.870968	0.954545	0.927536	0.986301	0.951613	0.95	0.969697	1	0.953846	0.909091	0.894737
0.9	1	0.983607	0.953125	0.933333	1	1	0.969697	0.982759	0.982143	0.983607	1	0.931034	0.897959	0.903846	0.866667
0.970588	1	1	0.955882	0.953846	0.969231	0.985915	0.971429	0.95	0.948276	1	0.984615	0.96875	0.982456	0.910714	0.985915	0.821429
0.926471	0.972222	0.921875	1	0.985714	0.970588	0.972603	0.986487	0.881356	0.984127	1	0.985294	0.954545	0.983333	0.933333	0.897059	0.921875	0.876923
1	1	0.978261	1	0.979167	0.933333	0.918367	1	0.976744	1	1	1	0.955556	0.973684	1	0.980769	0.906977	0.914894	0.941176
0.984615	1	0.983607	0.984849	0.95082	0.894737	0.9375	0.953846	0.982759	1	1	0.983607	0.966667	0.941176	0.963636	0.969697	0.912281	0.935484	0.938461	0.794872
1	1	1	0.984127	1	0.983051	1	1	0.943396	1	1	0.982759	1	0.98	0.981132	0.984375	0.865385	0.811321	0.9	0.871795	0.82
1	0.955882	1	0.985714	0.885246	0.953125	0.925373	0.971429	0.983871	0.983333	0.96875	0.952381	0.984615	0.982456	0.929825	0.925373	0.952381	0.955224	0.910448	0.9375	0.881356	0.764706
1	1	1	1	0.985294	1	1	0.986111	1	1	1	0.984849	0.984849	1	1	1	0.984849	0.907692	0.927536	1	0.953125	0.877193	0.907692
0.956522	0.971831	1	1	0.985507	0.985294	1	0.972222	1	1	0.969697	0.953846	0.985075	0.928571	1	1	0.985075	0.956522	0.928571	1	0.985075	0.934426	0.956522	0.648148
Bootstrap #28
0.915254
0.907407	0.854167
0.909091	0.920635	0.932203
0.901639	0.95	0.982456	0.816667
0.962963	0.938775	0.955556	0.888889	0.877551
0.948276	0.924528	0.893617	0.951613	0.947368	0.710526
0.984375	0.948276	1	0.904762	0.933333	0.847826	0.84
1	0.959184	0.904762	0.927273	0.92	0.897436	0.933333	0.790698
0.965517	0.962963	0.9375	0.933333	0.886792	0.978723	0.980769	0.903846	0.794872
0.9	0.983607	0.982143	0.870968	0.916667	0.981132	0.946429	0.967213	0.94	0.816327
0.934426	1	1	0.985294	0.933333	0.960784	0.964286	0.830189	0.96	0.963636	0.913793
0.949152	0.925926	0.960784	0.96875	1	0.913044	0.9	0.927273	0.957447	0.981132	1	0.907407
0.981482	0.98	0.977778	1	0.961538	1	0.978723	1	1	1	0.960784	1	1
0.947368	0.962963	0.959184	1	0.982759	0.978723	1	1	0.978261	1	0.982456	0.924528	1	0.794872
0.942029	0.954545	0.933333	0.973333	0.925373	0.929825	0.935484	0.985507	0.947368	0.934426	0.955882	1	0.969231	0.947368	0.916667
0.891892	0.987013	0.986111	0.97619	0.961538	1	1	0.987179	0.970149	0.942857	0.961039	0.987179	0.958904	0.921875	0.878788	0.898734
0.986842	1	0.985075	0.9875	0.958904	0.968254	0.985507	0.972222	0.984127	0.970149	1	0.972222	0.955882	0.95082	0.904762	0.935065	0.736111
0.921875	0.968254	0.909091	1	0.985075	0.982143	0.983607	1	0.981818	1	1	0.952381	0.95	0.962963	0.849057	0.878788	0.935897	0.916667
1	1	1	1	1	0.975	0.954545	1	1	1	1	1	0.955556	1	1	1	0.984849	0.983607	0.981132
1	0.981132	1	0.966667	0.963636	0.904762	0.9375	0.962264	1	1	1	0.981482	0.96	0.902439	0.958333	0.983871	0.985915	0.969231	0.982759	0.897436
1	1	1	0.964912	1	0.925	0.978723	1	0.97561	1	1	0.980392	1	0.97561	0.978261	0.983051	0.904762	0.877193	0.962963	0.974359	0.902439
1	0.982143	1	0.968254	0.928571	0.934783	0.941176	0.982456	1	1	0.982759	0.964286	0.981482	1	0.918367	0.96875	0.928571	0.939394	0.983607	0.954545	0.866667	0.702703
0.982456	0.981132	0.979167	1	0.982143	1	1	1	1	1	1	1	1	1	1	1	0.956522	0.936508	0.982759	1	0.933333	0.875	0.813953
0.916667	0.983333	1	1	1	0.960784	1	0.983607	1	1	0.983871	0.983607	0.982759	0.980392	1	1	0.946667	0.986301	0.984615	1	0.962264	0.938775	0.982456	0.804348
Bootstrap #22
0.849057
0.934426	0.862069
0.953125	0.847458	0.956522
0.927273	0.888889	1	0.862069
0.979592	0.9375	1	0.836735	0.911111
0.90566	0.927273	0.833333	0.916667	1	0.769231
0.982456	0.946429	1	0.898305	0.924528	0.769231	0.833333
1	0.931034	0.9	0.885246	0.909091	0.866667	0.946429	0.770833
0.983607	0.932203	0.936508	0.954545	0.983333	0.980392	0.928571	0.867924	0.74
0.912281	0.95	0.936508	0.921875	0.983333	0.96	0.928571	0.965517	0.983871	0.896552
0.98	0.980392	1	0.982456	0.979592	0.948718	0.957447	0.886364	0.96	0.94	0.918367
0.983051	0.910714	0.934426	0.969231	1	0.93617	0.884615	0.816327	0.966102	0.912281	0.966667	0.891304
1	1	1	1	0.980392	1	1	1	1	1	1	1	1
1	1	1	1	1	0.980392	0.983051	1	1	0.95082	0.967742	1	0.966667	0.690476
1	0.95	0.936508	0.970149	0.929825	0.938775	0.947368	1	0.983871	0.95082	0.967742	1	0.851852	0.962264	0.915254
0.936508	0.953846	0.941176	0.957746	0.984615	1	0.951613	0.968254	1	0.970149	1	0.964286	0.953125	0.888889	0.85	0.904762
1	1	0.947368	1	0.961538	1	1	0.980769	1	1	1	1	0.942308	0.883721	0.882353	0.882353	0.734694
0.982759	1	0.95082	1	0.945454	1	1	0.982143	0.947368	0.966102	1	0.979592	0.982759	0.96	0.87037	0.849057	0.935484	0.875
1	1	1	1	1	1	0.926829	1	1	1	1	1	0.977778	1	1	1	0.980769	0.975	1
0.983051	1	0.951613	0.953125	0.982759	0.93617	0.90566	0.982456	1	1	1	1	0.965517	0.960784	0.983607	0.949152	0.919355	0.962264	0.982759	0.878049
1	1	1	0.967742	1	0.931818	0.962264	1	0.964286	1	0.982759	1	1	0.979592	1	0.964912	0.915254	0.893617	1	0.97619	0.882353
1	0.983051	1	0.96875	0.982456	0.957447	0.963636	1	1	0.948276	1	1	0.964912	1	0.966102	0.948276	0.935484	0.961538	0.964286	0.953488	0.927273	0.833333
0.983333	0.983607	0.984615	1	0.965517	1	1	0.982759	1	1	1	0.980392	1	1	1	1	0.969697	0.962963	0.983051	1	0.983333	0.945454	0.867924
0.934426	1	1	1	0.984127	0.962264	1	0.967213	0.984615	0.984849	0.984849	0.962963	0.984375	0.964286	1	1	0.956522	1	0.984127	1	0.968254	0.966667	0.967742	0.8
Bootstrap #32
0.903226
0.881356	0.882353
0.950617	0.920455	0.892857
0.935484	0.944444	0.972222	0.892857
0.981482	0.984375	0.932203	0.891892	0.875
0.923077	0.918033	0.896552	0.893333	0.933333	0.707317
0.982759	0.985294	1	0.897436	0.901639	0.901961	0.882353
1	0.929577	0.861538	0.879518	0.942857	0.967213	0.967742	0.844828
0.962963	0.984615	0.896552	0.922078	0.915254	0.980769	0.981132	0.903846	0.836364
0.924528	0.969231	0.916667	0.894737	0.951613	1	0.962264	0.964286	0.916667	0.829787
0.965517	0.970588	1	1	0.9375	0.982143	0.982456	0.87037	0.985075	0.945454	0.907407
1	0.907692	0.904762	0.939759	1	0.925926	0.886792	0.892857	0.985294	0.982759	1	0.932203
1	0.96875	1	1	0.967742	1	1	1	0.95082	1	0.981482	1	1
0.966667	0.971429	0.923077	0.965116	0.985507	0.964912	0.965517	1	0.955224	0.909091	0.890909	0.915254	1	0.8
0.965517	0.955224	0.885246	0.964286	0.9375	0.963636	0.964286	0.966102	0.920635	0.945454	0.964912	1	0.932203	0.884615	0.95082
0.984849	0.95946	0.986487	0.94382	0.943662	1	1	0.9375	0.958333	0.951613	0.96875	0.985294	0.970588	0.839286	0.873016	0.830508
1	1	0.958333	1	0.928571	0.984127	0.984375	0.969697	0.958333	0.951613	1	0.985294	0.923077	0.87931	0.940299	0.868852	0.754098
0.967742	0.972222	0.892308	1	1	0.983333	0.983607	0.984375	0.892308	0.949152	1	0.984615	1	0.892857	0.847458	0.842105	0.942029	0.859375
1	1	0.979167	1	0.979167	0.944444	0.973684	1	0.934783	1	1	1	1	0.916667	1	0.925	0.93617	0.93617	0.906977
1	0.973684	0.986667	0.967391	0.972973	0.916667	0.952381	0.970149	0.958904	1	1	0.955224	0.955882	0.881356	0.941176	0.939394	0.95946	0.915493	0.942857	0.813953
1	1	1	0.987805	1	0.980769	0.981132	1	0.95082	1	1	0.945454	1	0.92	0.947368	0.925926	0.87931	0.87931	0.949152	0.818182	0.730769
1	1	1	0.988235	0.969231	0.962963	0.963636	0.983051	0.953125	0.982143	0.982456	0.929825	0.983607	0.944444	0.913793	0.929825	0.885246	0.903226	0.916667	0.764706	0.767857	0.609756
1	0.939394	1	1	0.953846	1	1	0.948276	0.9375	1	1	0.949152	0.967213	1	1	1	0.954545	0.938461	0.96875	1	0.970588	0.925926	0.803922
0.941176	1	1	1	0.949152	0.98	1	0.921569	1	1	0.960784	0.901961	0.982143	1	1	1	0.983871	1	0.965517	1	0.933333	0.980392	0.942308	0.727273
Bootstrap #13
0.913044
0.878788	0.916667
0.91358	0.902778	0.852941
0.917808	0.923077	0.970149	0.847222
0.909091	0.932203	0.931034	0.865672	0.864407
0.910448	0.896552	0.854545	0.930556	0.9375	0.755102
0.928571	0.9	1	0.946667	0.923077	0.764706	0.857143
1	0.980769	0.938775	0.9	0.924528	0.958333	1	0.847826
0.898551	0.969231	0.96875	0.933333	0.955882	0.877193	0.934426	0.803571	0.826087
0.887097	0.928571	0.964912	0.926471	0.967742	0.944444	0.925926	0.909091	0.955556	0.803922
0.915254	0.981482	1	1	0.927273	1	1	0.9	1	0.981818	0.886364
0.987013	0.921875	0.969697	0.987654	1	0.935484	0.936508	0.904762	1	0.939394	0.967213	0.925926
0.967742	1	0.961538	1	0.982759	1	0.960784	1	1	1	0.979167	1	1
0.971429	1	0.966667	0.972973	0.984849	0.983051	1	1	0.958333	0.933333	0.903846	0.980392	0.96875	0.7
0.958333	0.96875	0.968254	0.960526	0.939394	0.932203	0.915254	0.984615	0.980769	0.919355	0.947368	1	0.921875	0.962264	0.932203
0.962025	0.971831	0.971429	0.963855	0.973333	1	1	0.971831	1	0.972222	0.984849	0.983607	0.972973	0.872727	0.833333	0.910448
0.971831	1	0.983871	1	0.953846	0.983333	0.983607	0.95082	1	0.968254	1	0.960784	0.936508	0.895833	0.910714	0.95082	0.816667
0.984849	1	0.963636	1	1	0.981482	0.981818	0.982456	0.977273	0.946429	1	1	0.983333	0.978261	0.942308	0.925926	0.968254	0.923077
1	1	1	1	1	0.97619	0.952381	1	1	1	1	1	0.934783	1	1	1	0.980769	0.976744	0.972973
0.985075	1	1	0.971429	0.967213	0.88	0.924528	0.946429	1	1	1	1	0.966667	0.978723	0.962963	0.946429	0.96875	0.982143	0.959184	0.885714
1	1	1	0.971429	1	0.962963	0.963636	1	1	1	1	1	1	1	1	0.964912	0.935484	0.924528	0.98	0.916667	0.818182
1	1	1	0.973333	0.920635	0.948276	0.912281	0.984127	1	0.984375	0.982456	0.980769	0.969231	1	0.929825	0.915254	0.940299	0.983607	0.901961	0.952381	0.8125	0.787234
0.985294	0.983051	0.982759	1	0.967742	1	1	0.983051	1	1	1	0.979167	0.967213	1	1	1	0.984849	0.945454	0.938775	1	0.980769	0.960784	0.84
0.953125	1	1	1	0.983607	0.962264	1	0.945454	1	1	0.938775	0.906977	0.966102	0.978261	1	1	1	1	0.93617	1	0.914894	0.98	0.923077	0.818182
Bootstrap #19
0.866667
0.839286	0.833333
0.847222	0.859155	0.869565
0.936508	0.968254	0.983607	0.888889
0.927273	0.963636	0.961538	0.875	0.857143
0.929825	0.964912	0.923077	0.927536	0.925926	0.75
0.945454	0.962963	1	0.940299	0.942308	0.825	0.804878
1	0.983333	0.90566	0.944444	0.888889	0.96	0.941176	0.9375
0.935484	0.984127	0.929825	0.974026	1	0.921569	0.944444	0.897959	0.795918
0.821429	0.967742	0.948276	0.887324	0.983871	0.962264	0.963636	0.961538	0.927273	0.851852
0.938461	1	1	0.975	0.935484	1	1	0.882353	1	0.951613	0.898305
1	0.956522	1	1	1	0.973684	0.975	0.914286	1	0.954545	0.977778	0.957447
0.966102	0.964912	1	1	0.982456	1	1	1	0.941176	1	0.963636	1	1
0.923077	0.985075	0.951613	0.949367	0.984849	0.982759	0.983333	1	0.95	0.935484	0.918033	0.904762	0.979592	0.78
0.984849	0.968254	0.983607	0.987342	0.967742	0.962963	0.964286	1	0.928571	0.932203	0.967213	1	0.955556	0.862745	0.919355
0.915254	0.966667	0.982759	0.945206	0.983333	1	1	0.980392	0.924528	0.983051	0.983051	1	0.976744	0.777778	0.857143	0.755102
0.9375	1	1	0.961538	0.968254	0.982143	1	0.962963	0.929825	1	1	0.984849	1	0.843137	0.885246	0.898305	0.708333
0.985714	0.985294	0.935484	1	0.985075	1	1	0.982759	0.95082	0.984849	1	0.923077	1	0.931034	0.890625	0.866667	0.934426	0.830508
1	1	1	1	1	1	1	1	0.916667	1	1	1	1	0.911765	1	0.925	0.918919	0.926829	0.931818
1	0.971015	1	0.988235	0.939394	0.949152	0.967742	0.966102	0.952381	1	1	0.956522	0.980769	0.857143	0.942029	0.939394	0.953125	0.907692	0.957746	0.833333
1	1	1	0.974026	1	0.921569	0.982143	1	0.946429	1	0.983607	0.951613	1	0.903846	0.952381	0.932203	0.909091	0.814815	0.901639	0.864865	0.745455
1	0.984375	1	0.974359	0.915254	0.943396	0.964286	0.981482	0.947368	0.95	0.983871	0.935484	1	0.945454	0.936508	0.933333	0.910714	0.898305	0.903226	0.868421	0.75	0.6875
0.955224	0.953846	0.951613	1	0.936508	1	1	0.982456	1	1	1	0.985294	1	1	1	1	0.967742	0.953846	0.971015	1	0.926471	0.9	0.864407
0.958333	0.986111	1	1	0.985915	0.95082	1	0.967213	0.953846	0.955882	0.971015	0.957746	0.981482	0.984615	1	1	0.985294	0.986111	0.972973	1	0.973684	0.940299	0.971429	0.728814
Bootstrap #26
0.863636
0.921569	0.914894
0.933333	0.928571	0.859649
0.912281	0.945454	0.983871	0.909091
1	1	0.961538	0.913793	0.890909
0.903846	0.895833	0.925926	0.953125	0.916667	0.782609
1	1	1	0.948276	0.927273	0.913044	0.826087
1	0.96	0.86	0.9	0.95082	0.962264	0.982759	0.895833
0.980769	0.957447	0.92	0.894737	0.948276	1	0.923077	0.863636	0.804348
0.942308	1	0.943396	0.87931	0.932203	1	0.945454	1	0.963636	0.826087
0.938775	1	1	0.966667	0.928571	1	1	0.886364	1	0.959184	0.895833
0.981818	0.96	0.982143	0.952381	1	0.942308	0.964912	0.960784	1	0.942308	0.963636	0.961538
0.981818	0.980392	1	1	1	1	1	1	0.945454	1	0.963636	1	1
0.982456	1	0.982759	0.985075	0.984615	0.963636	0.983333	1	0.947368	0.944444	0.865385	0.962963	0.965517	0.867924
0.983607	0.982456	0.983871	1	0.90625	0.966102	0.951613	1	0.933333	0.948276	0.967213	1	0.95082	0.915254	0.918033
0.945454	0.981132	0.982759	0.985075	1	1	1	0.981482	0.947368	1	1	1	0.965517	0.888889	0.912281	0.881356
0.981818	1	1	1	0.984127	1	1	0.960784	0.90566	1	1	0.981132	1	0.90566	0.909091	0.933333	0.75
0.983333	1	0.983607	1	0.938461	0.947368	0.95082	0.982456	0.913793	0.983051	1	0.964912	0.983871	0.913793	0.87931	0.810345	0.898305	0.854545
1	1	0.979592	1	0.982143	0.909091	0.916667	1	0.9375	1	1	1	0.914894	0.9375	1	0.944444	0.94	0.9375	0.88
1	0.983871	0.985075	0.973333	0.928571	0.9	0.923077	0.967742	0.954545	1	1	1	0.970149	0.904762	0.955882	0.928571	0.924242	0.938461	0.878788	0.784314
1	1	1	1	1	0.954545	1	1	0.934783	1	1	1	1	0.911111	1	0.942308	0.866667	0.860465	0.941176	0.894737	0.888889
1	0.96	1	1	0.877193	0.962264	0.927273	0.960784	0.945454	1	0.982143	0.981132	0.982456	0.945454	0.928571	0.877193	0.867924	0.925926	0.875	0.914894	0.830508	0.804878
1	1	1	1	0.947368	1	1	0.979167	1	1	1	0.979592	0.981132	1	1	1	0.981818	0.961538	0.964912	1	0.968254	0.977273	0.851064
0.964286	0.961538	1	1	0.984615	0.963636	1	0.981482	0.983051	0.982143	0.982759	0.962963	1	0.965517	1	1	0.983607	1	0.968254	1	1	0.959184	0.965517	0.727273
Bootstrap #23
0.924242
0.875	0.898305
0.873239	0.926471	0.957746
0.897059	0.9375	0.970149	0.758065
0.969697	0.929825	0.912281	0.870968	0.859649
0.9	0.907407	0.909091	0.9375	0.967213	0.697674
0.985714	0.915254	1	0.893939	0.885246	0.849057	0.82
1	0.961538	0.962264	0.894737	0.862745	0.914894	0.957447	0.8
0.984615	0.964912	0.965517	0.953846	0.967213	0.962963	0.961538	0.886792	0.833333
0.902778	0.941176	0.942029	0.92	0.972973	0.970149	0.953125	0.956522	0.966667	0.803571
0.951613	0.964286	1	0.984849	0.949152	1	1	0.925926	1	0.87234	0.821429
1	0.95082	0.984375	1	1	0.966102	0.964912	0.915254	1	0.886792	0.925373	0.84
0.965517	0.960784	1	1	1	1	1	1	1	1	0.983333	1	1
0.970149	1	1	1	1	0.964912	1	1	0.980392	0.982143	0.939394	0.981818	0.983607	0.813953
0.953846	0.983333	0.983607	0.955224	0.968254	0.90566	0.943396	0.983333	0.98	0.943396	0.954545	1	0.948276	1	0.907407
0.919355	0.983051	0.966102	0.970149	0.984127	1	1	0.947368	0.979592	0.962264	0.969697	1	0.965517	0.957447	0.884615	0.86
0.971831	1	0.984849	1	0.970588	0.983871	0.983333	0.952381	0.981818	1	1	0.983051	0.952381	0.942308	0.877193	0.95	0.851852
1	1	0.967213	1	0.984615	0.964912	0.963636	0.966667	1	0.924528	1	1	1	0.98	0.947368	0.946429	0.964286	0.877193
1	1	0.961538	1	0.963636	0.913044	0.933333	1	1	1	1	1	0.87234	1	1	1	1	1	0.959184
0.972973	0.970149	0.970588	0.973684	0.926471	0.862069	0.915254	0.970149	1	1	1	0.983871	0.985294	0.925926	0.969231	0.96875	1	0.971015	0.969231	0.791667
1	1	1	0.967742	1	0.916667	0.958333	1	0.977273	1	1	0.979167	1	0.976744	0.980769	0.96	0.98	0.924528	0.960784	0.926829	0.823529
1	0.968254	1	0.972222	0.954545	0.949152	0.947368	0.984375	1	0.983051	1	0.982759	0.984375	1	0.967213	0.966667	0.983333	1	0.967213	0.92	0.813559	0.782609
0.985075	0.966102	0.983607	1	0.934426	1	1	0.966102	0.98	1	1	0.962264	0.983333	1	1	1	1	0.967213	0.927273	1	0.935484	0.893617	0.807692
0.919355	0.983051	1	1	0.967742	0.944444	1	0.947368	1	1	0.969697	0.92	0.983051	0.957447	1	1	0.943396	0.966667	0.925926	1	0.968254	0.866667	0.929825	0.733333
Bootstrap #30
0.87037
0.814815	0.907407
0.867647	0.925373	0.880597
0.877551	0.958333	1	0.881356
0.982759	0.961538	0.982143	0.833333	0.933333
0.918033	0.948276	0.877193	0.9	0.981482	0.627907
0.982759	0.92	1	0.923077	1	0.893617	0.843137
1	0.952381	0.921875	0.891892	0.983051	0.95082	0.955882	0.836364
0.967742	0.982759	0.931034	0.897059	0.94	0.963636	0.984127	0.963636	0.767857
0.9	0.929825	0.933333	0.9	0.921569	0.964912	0.952381	0.927273	0.907692	0.72
0.95082	0.964912	1	0.986487	0.94	0.982143	0.984127	0.86	0.985294	0.949152	0.857143
0.964286	1	0.962963	0.985294	1	0.959184	0.982456	0.959184	0.983871	0.962963	0.964286	0.88
0.980769	1	0.98	1	0.97561	1	0.980769	1	0.945454	1	1	1	1
0.933333	1	0.966667	0.928571	0.980769	0.982143	0.984127	1	0.954545	0.966667	0.933333	0.966667	1	0.725
1	1	0.965517	0.957143	0.98	0.942308	0.949152	1	0.919355	0.965517	0.966667	1	0.961538	0.860465	0.947368
0.888889	0.984375	0.969697	0.948052	0.982759	1	0.970588	1	0.928571	0.969697	0.970588	1	0.966667	0.836735	0.827586	0.821429
0.936508	1	0.968254	0.96	0.981818	1	1	0.965517	0.941176	1	1	0.968254	0.946429	0.897959	0.859649	0.875	0.685185
0.967742	1	0.966667	1	1	0.924528	0.933333	1	0.921875	0.966667	1	0.983607	0.962963	0.9375	0.966667	0.888889	0.885246	0.839286
1	1	1	1	1	0.913044	0.903846	1	0.949152	1	1	1	0.957447	0.926829	1	0.94	0.910714	0.90566	0.854167
0.972973	1	0.972222	0.951807	1	0.887097	0.865672	1	0.961538	1	1	0.986301	0.985075	0.95	0.972222	0.892308	0.888889	0.9	0.878788	0.781818
1	1	1	0.958904	1	0.925926	0.951613	1	0.939394	1	1	0.983871	1	0.938775	0.983871	0.890909	0.85	0.862069	0.894737	0.857143	0.75
1	0.985075	1	0.962963	0.983607	0.952381	0.957143	1	0.96	0.924242	0.986111	0.971015	0.968254	0.947368	0.955882	0.887097	0.915493	0.927536	0.907692	0.857143	0.814286	0.736842
0.967213	0.925926	0.966102	1	1	1	1	1	0.969697	1	1	1	0.942308	1	1	1	0.969231	0.95082	0.983333	1	0.957143	0.931034	0.888889
0.962264	1	1	1	1	0.978723	1	1	0.965517	0.960784	0.981482	0.980769	1	0.97561	1	1	0.982759	0.981818	0.980769	1	1	0.961538	1	0.844445
Bootstrap #17
0.793103
0.904762	0.953125
0.898551	0.927536	0.926471
0.948276	0.964912	0.982456	0.859649
0.935484	0.95082	0.95	0.870968	0.804348
0.836066	0.904762	0.827586	0.928571	0.867924	0.645833
0.966102	0.927273	1	0.898305	0.863636	0.829787	0.846154
1	0.970149	0.953846	0.928571	0.928571	0.951613	0.939394	0.846154
0.966102	1	0.964286	0.951613	0.979592	0.981482	1	0.93617	0.8
0.920635	0.952381	0.951613	0.892308	0.963636	0.966667	0.936508	0.903846	0.919355	0.8125
0.982759	0.982143	1	0.967213	0.933333	0.980769	0.982456	0.933333	0.982456	0.933333	0.854167
0.984127	0.983607	0.983333	0.969697	1	0.964286	0.967213	0.918367	0.983871	0.980769	0.983051	0.813953
1	0.981482	0.961538	0.983333	1	1	0.962963	1	0.943396	1	0.960784	1	1
0.941176	0.985507	0.970149	0.929577	0.983333	0.935484	0.971015	1	0.971015	0.948276	0.969697	0.946429	1	0.903846
0.971831	0.971015	0.955224	0.973333	0.983607	0.969231	1	0.983607	0.892308	0.931034	0.938461	1	0.968254	0.84	0.893939
0.931507	0.972973	0.928571	0.921053	0.984849	1	0.973333	0.984849	0.915493	0.919355	0.942857	0.984375	0.985507	0.875	0.852941	0.765625
0.947368	1	0.982143	0.95082	0.979167	0.981132	0.982759	0.979167	0.927273	1	1	1	0.938775	0.928571	0.909091	0.910714	0.8
0.970588	0.985075	0.936508	1	1	1	1	0.982759	0.904762	0.964912	1	1	0.983607	0.921569	0.90625	0.890625	0.929577	0.84
1	1	1	1	1	1	1	1	0.923077	1	1	1	0.970588	0.88	1	0.926829	0.934783	0.892857	0.921053
1	0.985915	0.971015	0.973684	0.932203	0.953846	0.926471	0.95	0.957143	1	1	0.966102	0.96875	0.927273	0.942857	0.943662	0.918919	0.949152	0.941176	0.902439
1	1	1	1	1	0.967742	1	1	0.921875	1	0.96875	0.963636	1	0.942308	0.970588	0.955882	0.944444	0.884615	0.866667	0.921053	0.819672
1	0.954545	1	1	0.909091	0.951613	0.955224	0.947368	0.955224	0.965517	0.984849	0.945454	0.95	0.943396	0.940299	0.941176	0.930556	0.927273	0.887097	0.894737	0.822581	0.767857
1	0.982456	1	1	0.957447	1	1	0.979167	0.982759	1	1	0.978261	1	1	1	1	0.984615	0.933333	0.964286	1	0.931034	0.884615	0.886792
0.982759	1	1	1	0.978723	0.960784	1	0.978723	0.982456	0.978723	1	0.977778	1	1	1	1	0.984375	0.955556	0.963636	1	0.983333	0.903846	0.982456	0.763158
Bootstrap #34
0.918033
0.868852	0.887097
0.898551	0.914286	0.871429
0.983871	0.95	0.918033	0.822581
0.910714	0.910714	0.877193	0.854839	0.816327
0.910714	0.948276	0.857143	0.940299	0.945454	0.808511
0.945454	0.945454	1	0.920635	0.962264	0.822222	0.767442
1	1	0.95	0.888889	0.924528	0.921569	0.9	0.818182
0.954545	0.985294	0.985915	0.946667	0.96875	0.95082	0.933333	0.849057	0.875
0.895522	0.942857	0.973333	0.936709	0.955882	0.970149	0.904762	0.96875	0.969697	0.850746
0.940299	0.971015	1	0.9875	0.9375	0.984615	0.984615	0.913793	0.984375	0.878788	0.855072
0.969697	0.953846	0.971015	1	1	0.967213	0.913793	0.928571	0.983607	0.873016	0.929577	0.859375
1	1	1	1	1	1	1	1	0.944444	1	1	1	1
0.95082	0.967742	0.953125	0.972222	0.966102	0.964912	1	1	0.964286	0.919355	0.875	0.921875	0.952381	0.95
0.956522	0.941176	0.913044	0.987654	0.985294	0.953125	0.969231	1	0.918033	0.943662	0.947368	1	0.895522	0.913044	0.870968
0.952381	0.96875	0.921875	0.958904	1	1	0.948276	1	0.947368	0.954545	0.986301	0.971015	0.969697	0.9	0.896552	0.875
0.983051	1	0.967213	0.985507	0.924528	0.981482	0.981482	0.938775	0.941176	0.983871	1	0.968254	0.949152	0.944444	0.964286	0.9	0.867924
0.934426	0.968254	0.9375	1	1	1	1	0.982143	0.927273	0.969697	1	0.985507	0.969231	0.951219	0.932203	0.873016	0.934426	0.770833
1	1	0.960784	1	0.955556	0.953488	1	1	0.952381	1	1	1	0.916667	0.923077	1	0.962963	0.93617	0.926829	0.957447
0.948276	1	0.915254	0.985714	0.964286	0.943396	0.923077	1	0.962264	1	1	0.952381	1	0.916667	0.946429	0.953125	0.890909	0.942308	0.965517	0.846154
1	1	1	0.985507	1	0.962264	0.981482	1	0.961538	1	1	0.951613	1	0.944444	0.945454	0.952381	0.928571	0.897959	0.946429	0.9	0.75
1	1	1	0.985915	0.946429	0.982143	0.963636	1	0.962963	0.984375	0.970588	0.919355	1	0.947368	0.888889	0.9375	0.949152	0.962963	0.910714	0.904762	0.836735	0.755556
1	1	1	1	0.979592	1	1	0.977273	1	1	1	0.982456	0.981482	1	1	1	1	0.978261	0.916667	1	0.978723	0.955556	0.860465
0.95082	0.984127	1	1	0.983333	0.982759	1	0.981818	1	1	0.956522	0.938461	1	0.97561	1	1	1	0.982456	0.932203	1	0.964912	0.964286	0.947368	0.785714
Bootstrap #36
0.844828
0.865672	0.926471
0.907692	0.9375	0.9
0.955224	0.969231	0.929577	0.854839
0.954545	0.952381	0.928571	0.870968	0.810345
0.859649	0.931034	0.890625	0.881356	0.898305	0.693878
0.946429	0.923077	1	0.928571	0.927273	0.73913	0.826087
1	0.951613	0.911765	0.904762	0.9375	0.936508	0.894737	0.86
0.951613	0.983607	0.955882	0.935484	0.951613	0.915254	0.983051	0.941176	0.811321
0.936508	0.933333	0.926471	0.9375	0.969231	0.96875	0.931034	0.962963	0.934426	0.830189
0.983607	0.964912	1	0.983871	0.949152	0.983333	0.982143	0.9375	0.983051	0.924528	0.886792
1	0.968254	0.986301	0.985294	1	0.936508	0.967213	0.882353	0.984615	0.967213	0.968254	0.867924
0.962264	0.96	1	0.981818	1	1	1	1	0.980769	1	1	1	1
0.945946	1	0.987952	0.946667	0.987013	0.973333	0.986111	1	0.972973	0.971831	0.943662	0.90625	0.986667	0.714286
0.949152	0.964912	0.969697	0.967213	1	0.966102	0.982143	1	0.947368	0.924528	0.964912	1	0.928571	0.880952	0.870968
0.934426	0.983607	0.971015	0.952381	1	1	0.983051	0.981132	0.967213	0.947368	0.983607	0.963636	0.983871	0.837209	0.783333	0.86
0.940299	1	0.986842	0.971429	0.955882	0.985507	0.984615	0.983051	0.970149	0.96875	1	1	0.921875	0.923077	0.871429	0.95	0.777778
1	1	0.972973	1	1	0.970149	0.968254	0.982759	0.969697	1	1	0.966667	1	0.921569	0.885714	0.931034	0.951613	0.854839
1	1	0.921569	1	0.911111	0.857143	0.952381	1	0.978261	1	1	1	0.978261	0.969697	1	0.975	0.976744	0.979592	0.934783
0.975	0.974026	0.939759	0.975309	0.921053	0.842857	0.915493	0.940299	0.987342	1	1	0.942857	0.961039	0.936508	0.915663	0.957746	0.95946	0.975309	0.948718	0.755102
1	1	1	0.984615	1	0.95082	0.983051	1	0.967213	1	0.983607	0.924528	1	0.979592	0.942029	0.963636	0.947368	0.918033	0.916667	0.9	0.796875
1	0.982759	1	0.983871	0.949152	0.948276	0.944444	0.959184	0.983051	1	0.982759	0.897959	0.983051	0.978261	0.90625	0.941176	0.944444	0.967213	0.912281	0.891892	0.766667	0.704545
0.966667	0.946429	0.969697	1	0.966667	1	1	0.959184	0.983051	1	1	0.961538	1	1	1	1	0.982143	0.913793	0.949152	1	1	0.924528	0.875
0.985915	0.970149	1	1	0.971429	0.940299	1	0.929825	0.985507	0.984849	0.985294	0.95082	0.970588	0.982143	1	1	1	0.971831	0.956522	1	0.95	0.919355	0.967742	0.745098
Bootstrap #38
0.859375
0.866667	0.924242
0.885714	0.875	0.882353
0.951613	0.9375	1	0.910448
0.90566	0.948276	0.962963	0.935484	0.960784
0.857143	0.901639	0.912281	0.956522	0.982759	0.631579
0.949152	0.934426	1	0.923077	0.944444	0.863636	0.88
1	0.984127	0.865385	0.904762	0.943396	0.957447	0.981482	0.918367
0.968254	0.985075	0.913793	0.893939	0.965517	0.94	0.982759	0.903846	0.666667
0.945946	0.948052	0.898551	0.911392	0.957143	0.952381	0.892308	0.888889	0.904762	0.783333
0.983607	0.984375	1	1	0.982143	0.979592	0.981818	0.875	0.980769	0.882353	0.870968
0.955224	0.971831	1	0.987013	1	0.884615	0.933333	0.949152	0.983333	0.951613	0.96	0.872727
0.952381	1	1	1	0.966102	1	1	1	1	1	0.986301	1	1
0.890625	0.986301	0.954545	0.932432	0.984615	1	1	1	0.949152	0.935484	0.932432	0.967213	0.985714	0.735849
0.966667	0.968254	0.983051	0.955224	0.882353	0.958333	0.943396	0.961538	0.980769	0.924528	0.939394	1	0.966667	0.884615	0.875
0.830986	0.951219	0.9875	0.890244	0.945946	1	1	0.958333	0.986301	0.945946	0.965909	0.986487	0.949367	0.871429	0.816901	0.809524
0.903226	1	1	0.958904	0.983871	0.943396	0.949152	0.965517	0.982759	1	1	0.983051	0.953846	0.95082	0.85	0.983051	0.772727
0.925926	0.983333	0.923077	1	0.980769	0.977778	0.980392	0.979592	1	0.960784	1	0.979592	0.945454	0.961538	0.843137	0.913044	0.924242	0.901961
1	1	1	1	1	0.969697	0.974359	1	1	1	1	1	0.977778	1	1	1	1	1	0.969697
1	1	1	0.970149	1	0.957447	0.962264	1	1	1	1	1	0.983333	0.982143	0.966667	0.960784	0.986301	0.964912	0.957447	0.878788
1	1	1	0.984375	1	0.902439	0.98	1	1	1	0.984375	1	1	1	1	0.979167	0.985507	0.962264	0.953488	0.935484	0.829268
1	0.961538	1	0.982759	0.954545	0.973684	0.953488	1	1	1	0.982759	0.97619	1	1	0.916667	0.925	0.95082	1	0.973684	0.875	0.864865	0.848485
1	0.981482	1	1	1	1	1	1	0.97619	1	1	1	0.980392	1	1	1	1	0.93617	0.947368	1	0.951219	0.916667	0.935484
0.935484	0.938461	1	1	1	0.941176	1	1	0.982143	0.983333	0.986301	0.982456	1	0.983607	1	1	0.960526	0.967742	0.961538	1	0.963636	0.895833	1	0.933333
Bootstrap #21
0.851064
0.887097	0.839286
0.939394	0.96875	0.875
0.980769	0.934783	0.95082	0.839286
0.982759	0.9	0.939394	0.775862	0.772727
0.965517	0.923077	0.924242	0.925373	0.942308	0.729167
0.984127	0.947368	1	0.914286	0.927273	0.796296	0.754717
1	0.929825	0.929577	0.884058	0.928571	0.881356	0.901639	0.775862
0.961538	0.913044	0.951613	0.952381	0.979167	0.921569	0.901961	0.846154	0.87037
0.944444	0.94	0.953846	0.970149	0.96	0.964286	0.907407	0.95	0.984127	0.847826
0.961538	0.979592	1	1	0.934783	0.962264	0.962963	0.867924	0.966102	0.958333	0.895833
0.962264	1	1	1	1	0.923077	0.903846	0.87037	0.966667	0.914894	0.961538	0.813953
0.979167	0.977273	0.965517	0.983333	0.976744	1	0.959184	1	0.981818	1	1	1	1
0.942308	0.98	0.984615	0.969231	0.979592	0.981818	0.982143	1	0.983607	0.98	0.941176	0.959184	0.980392	0.756757
0.947368	0.981818	0.971015	0.971429	0.981482	0.983333	0.983607	1	0.969231	0.962963	0.982759	1	0.982143	0.891304	0.836735
0.913793	1	0.957746	0.986487	0.982456	1	0.984375	0.985294	0.985507	0.982759	1	0.982759	0.947368	0.897959	0.867924	0.796296
0.967742	1	1	0.972973	0.946429	0.968254	0.984615	0.955224	0.971015	1	1	0.983051	0.966102	0.942308	0.890909	0.952381	0.789474
0.951613	0.983333	0.958904	1	1	1	1	0.971015	0.956522	1	1	0.983333	0.966667	0.943396	0.830189	0.864407	0.888889	0.890625
1	1	1	1	1	1	1	1	0.979592	1	1	1	0.947368	0.969697	1	0.977273	0.956522	0.957447	0.979592
0.98	0.978261	0.983607	0.983871	0.977778	0.96	0.94	0.982143	0.982456	1	1	1	1	0.894737	0.933333	0.895833	0.88	0.924528	0.925926	0.909091
1	1	1	0.974684	1	0.939394	0.985714	1	0.958904	1	0.969697	1	1	0.965517	1	0.971015	0.895522	0.828125	0.958904	0.941176	0.851852
1	0.966102	1	0.973333	0.965517	0.952381	0.969231	0.985714	0.985915	0.983333	0.984127	0.983333	1	0.981818	0.931034	0.919355	0.870968	0.907692	0.857143	0.913044	0.862745	0.774193
0.971429	0.9375	0.975309	1	0.984849	1	1	0.987013	0.974026	1	1	0.985075	0.970149	1	1	1	0.945206	0.916667	0.960526	1	0.968254	0.893333	0.838235
0.967742	1	1	1	0.982759	0.968254	1	0.985507	1	1	0.983871	0.965517	1	0.981482	1	1	0.985294	1	0.955882	1	1	0.943662	0.924242	0.677966
Bootstrap #27
0.868852
0.811321	0.825397
0.909091	0.863014	0.9
0.925926	0.904762	0.983871	0.892308
0.961538	0.934426	0.907407	0.866667	0.826087
0.92	0.916667	0.82	0.920635	0.961538	0.75
1	0.952381	1	0.938461	0.921569	0.840909	0.813953
1	0.955224	0.967742	0.926471	0.886792	0.9	0.921569	0.782609
0.964286	0.985294	0.967213	0.971429	0.982456	0.981132	0.941176	0.9	0.770833
0.965517	0.985714	0.968254	0.957746	0.983051	0.981818	0.923077	0.963636	0.948276	0.846154
0.980769	1	1	1	0.960784	0.957447	0.957447	0.837209	0.961538	0.960784	0.962264
0.981818	0.953125	0.948276	0.939394	1	0.916667	0.844445	0.87234	0.963636	0.962963	0.982456	0.813953
1	0.962264	0.979167	1	0.976744	1	0.974359	1	1	1	0.977778	1	1
0.980392	1	0.982143	0.96875	1	1	1	1	0.980769	0.96	0.981132	0.931818	1	0.8125
0.979592	1	1	0.984127	0.93617	0.977778	0.977778	1	0.98	0.979592	0.980392	1	1	0.971429	0.952381
0.951613	0.972973	0.939394	0.960526	0.984375	1	0.983333	0.983607	0.984615	0.984375	0.984849	1	0.967213	0.9375	0.886792	0.903846
0.983051	1	1	0.942857	1	0.923077	0.981818	0.944444	1	1	1	0.962264	0.945454	0.930233	0.92	0.980392	0.735849
0.982143	1	0.983607	1	0.963636	0.980769	0.980769	0.981132	0.945454	0.944444	1	0.916667	0.981482	0.97619	0.866667	0.911111	0.95082	0.946429
1	1	0.978261	1	0.97561	0.944444	0.972973	1	1	1	1	1	0.974359	1	1	1	0.979167	0.976744	0.975
0.984615	0.973333	0.971015	0.974359	0.96875	0.931034	0.931034	0.983871	1	1	1	0.983333	0.984127	0.938775	0.909091	0.964286	0.957143	0.953846	0.968254	0.809524
1	1	1	0.938461	1	0.914894	0.98	1	1	1	1	0.979592	1	0.975	0.979167	0.978261	0.949152	0.787234	0.981132	0.885714	0.833333
1	1	1	0.945946	0.984127	0.909091	0.965517	0.983333	1	0.967742	1	0.982759	0.966667	1	0.945454	0.962963	0.940299	0.918033	0.983871	0.909091	0.779661	0.755102
0.948276	0.925373	0.952381	1	0.983333	1	1	0.982456	0.966667	1	1	0.981818	0.964912	1	1	1	0.969697	0.95	0.983051	1	0.938461	0.925926	0.824561
0.983333	0.985915	1	1	0.983333	1	1	0.982456	0.931034	0.929825	1	0.981818	1	1	1	1	0.985075	0.983871	0.983051	1	0.985294	0.964286	0.984849	0.814815
Bootstrap #25
0.843137
0.92	0.903846
0.898305	0.903226	0.95
0.933333	0.969231	0.949152	0.893939
0.928571	0.967213	0.884615	0.830508	0.866667
0.910714	0.915254	0.907407	0.888889	0.921875	0.75
0.943396	0.927273	1	0.951613	0.967742	0.823529	0.826923
1	0.9	0.93617	0.966102	0.947368	0.962963	0.924528	0.893617
0.964912	0.966667	0.982143	0.985075	0.901639	0.913793	0.933333	0.886792	0.921569
0.859649	0.969697	0.983871	0.927536	0.986111	0.970149	0.939394	0.951613	1	0.920635
0.888889	1	1	0.954545	0.9375	0.984127	0.984375	0.846154	0.981818	0.875	0.85
1	0.96875	0.983333	0.956522	1	0.901639	0.953846	0.875	0.982759	0.935484	0.956522	0.919355
1	1	0.978723	0.982759	0.964286	1	0.981482	1	1	1	0.982759	1	1
0.93617	0.980769	0.978723	0.946429	1	1	1	1	0.977778	0.980769	0.907407	1	0.982143	0.777778
0.966667	0.968254	0.928571	0.955882	0.955224	0.952381	0.953125	1	0.964286	0.916667	0.985714	1	0.954545	0.857143	0.923077
0.966667	0.968254	0.947368	0.940299	0.970588	1	0.953125	0.983607	1	0.951613	1	0.952381	0.985294	0.833333	0.857143	0.885246
0.967742	1	0.983607	0.957143	0.892308	0.969697	0.985294	0.967742	0.983051	0.919355	1	0.969697	0.955882	0.964286	0.90566	0.970588	0.852459
0.980769	0.981818	0.914894	1	0.983333	1	1	1	0.934783	0.981818	1	0.982143	1	1	0.955556	0.886792	0.982759	0.826923
1	1	0.951219	1	0.960784	0.957447	0.979592	1	1	1	1	1	0.96	1	1	1	0.959184	0.960784	1
1	1	0.910714	0.925373	0.971015	0.883333	0.920635	0.95	1	1	1	1	0.90625	0.982143	0.963636	0.954545	0.904762	0.940299	0.983051	0.916667
1	1	1	0.948276	1	0.943396	0.963636	1	1	1	0.966102	1	1	1	1	0.964286	0.925926	0.888889	0.934783	0.948718	0.843137
1	0.98	1	0.944444	1	0.938775	0.960784	1	1	1	1	1	0.981482	1	0.97561	0.941176	0.961538	0.962963	0.928571	0.942857	0.942308	0.810811
0.982759	0.949152	0.982143	1	0.969231	1	1	0.964912	0.962264	1	1	0.967213	0.984615	1	1	1	0.984375	0.953125	0.943396	1	1	0.9	0.914894
0.939394	0.986111	1	1	0.973684	0.957746	1	0.923077	1	1	0.946667	0.911765	0.95946	0.967742	1	1	1	0.973684	0.953125	1	0.915493	0.935484	0.949152	0.696429
Bootstrap #31
0.854839
0.84375	0.803279
0.808824	0.873239	0.830986
0.903226	0.953125	0.970588	0.9
0.982759	0.964286	0.929825	0.903226	0.829787
0.95	0.892857	0.968254	0.925373	0.946429	0.648649
1	0.932203	1	0.910448	0.909091	0.813953	0.777778
1	0.970149	0.875	0.932432	0.935484	0.903846	0.910714	0.784314
0.949152	0.966102	0.984127	0.971015	0.925926	0.979167	0.960784	0.941176	0.928571
0.927536	0.957143	1	0.935897	0.955224	0.983333	0.934426	0.935484	0.985915	0.836364
0.929825	0.965517	1	0.985507	0.924528	0.956522	0.96	0.87234	0.964912	0.98	0.833333
1	0.952381	0.970149	0.958904	1	0.941176	0.925926	0.964912	0.968254	0.963636	0.970149	0.857143
0.982759	1	1	1	0.981482	1	1	1	0.982143	1	0.966102	1	1
0.90625	0.970149	0.971429	0.960526	0.984615	1	1	1	0.969697	0.909091	0.941176	0.964912	0.984375	0.86
0.955224	0.970149	0.925373	0.960526	0.952381	0.944444	0.948276	0.983607	0.9375	0.928571	0.956522	1	0.968254	0.882353	0.903226
0.901639	0.984615	1	0.929577	0.967213	1	1	0.982759	0.968254	0.963636	0.970149	1	1	0.851064	0.859649	0.796296
0.938461	1	0.985714	0.96	0.951613	0.981818	0.983051	0.966102	0.953125	0.964912	1	0.982456	0.95082	0.923077	0.864407	0.936508	0.72
0.967742	0.967213	0.918033	1	0.983051	0.98	0.981482	0.981818	0.912281	0.875	1	1	1	0.98	0.872727	0.851852	0.964912	0.910714
1	1	0.965517	1	0.961538	0.928571	0.934783	1	0.981818	1	1	1	0.895833	0.977273	1	0.981818	0.960784	0.962264	0.958333
0.985507	1	0.971429	0.946667	0.935484	0.86	0.910714	0.966667	0.985075	1	1	0.982759	0.968254	0.944444	0.985075	0.953846	0.968254	0.919355	0.966667	0.857143
1	1	1	0.971831	1	0.9375	0.962264	1	0.966667	1	0.96875	0.980769	1	0.9375	0.983607	0.949152	0.946429	0.890909	0.962963	0.913044	0.784314
1	1	1	0.971429	0.946429	0.913044	0.92	0.962264	0.983333	0.960784	0.984375	0.96	0.964286	0.979592	0.948276	0.948276	0.945454	0.965517	0.942308	0.886364	0.849057	0.777778
1	1	1	1	0.981482	1	1	0.98	1	1	1	0.978723	0.981132	1	1	1	0.981132	0.962963	0.9375	1	0.982143	0.914894	0.913044
0.936508	0.984615	1	1	0.983871	0.981132	1	0.982759	1	1	0.970149	0.943396	1	0.941176	1	1	0.966667	0.984127	0.946429	1	0.968254	0.946429	0.945454	0.744186
Bootstrap #40
0.859375
0.866667	0.924242
0.885714	0.875	0.882353
0.951613	0.9375	1	0.910448
0.90566	0.948276	0.962963	0.935484	0.960784
0.857143	0.901639	0.912281	0.956522	0.982759	0.631579
0.949152	0.934426	1	0.923077	0.944444	0.863636	0.88
1	0.984127	0.865385	0.904762	0.943396	0.957447	0.981482	0.918367
0.968254	0.985075	0.913793	0.893939	0.965517	0.94	0.982759	0.903846	0.666667
0.945946	0.948052	0.898551	0.911392	0.957143	0.952381	0.892308	0.888889	0.904762	0.783333
0.983607	0.984375	1	1	0.982143	0.979592	0.981818	0.875	0.980769	0.882353	0.870968
0.955224	0.971831	1	0.987013	1	0.884615	0.933333	0.949152	0.983333	0.951613	0.96	0.872727
0.952381	1	1	1	0.966102	1	1	1	1	1	0.986301	1	1
0.890625	0.986301	0.954545	0.932432	0.984615	1	1	1	0.949152	0.935484	0.932432	0.967213	0.985714	0.735849
0.966667	0.968254	0.983051	0.955224	0.882353	0.958333	0.943396	0.961538	0.980769	0.924528	0.939394	1	0.966667	0.884615	0.875
0.830986	0.951219	0.9875	0.890244	0.945946	1	1	0.958333	0.986301	0.945946	0.965909	0.986487	0.949367	0.871429	0.816901	0.809524
0.903226	1	1	0.958904	0.983871	0.943396	0.949152	0.965517	0.982759	1	1	0.983051	0.953846	0.95082	0.85	0.983051	0.772727
0.925926	0.983333	0.923077	1	0.980769	0.977778	0.980392	0.979592	1	0.960784	1	0.979592	0.945454	0.961538	0.843137	0.913044	0.924242	0.901961
1	1	1	1	1	0.969697	0.974359	1	1	1	1	1	0.977778	1	1	1	1	1	0.969697
1	1	1	0.970149	1	0.957447	0.962264	1	1	1	1	1	0.983333	0.982143	0.966667	0.960784	0.986301	0.964912	0.957447	0.878788
1	1	1	0.984375	1	0.902439	0.98	1	1	1	0.984375	1	1	1	1	0.979167	0.985507	0.962264	0.953488	0.935484	0.829268
1	0.961538	1	0.982759	0.954545	0.973684	0.953488	1	1	1	0.982759	0.97619	1	1	0.916667	0.925	0.95082	1	0.973684	0.875	0.864865	0.848485
1	0.981482	1	1	1	1	1	1	0.97619	1	1	1	0.980392	1	1	1	1	0.93617	0.947368	1	0.951219	0.916667	0.935484
0.935484	0.938461	1	1	1	0.941176	1	1	0.982143	0.983333	0.986301	0.982456	1	0.983607	1	1	0.960526	0.967742	0.961538	1	0.963636	0.895833	1	0.933333
Bootstrap #29
0.854839
0.84375	0.803279
0.808824	0.873239	0.830986
0.903226	0.953125	0.970588	0.9
0.982759	0.964286	0.929825	0.903226	0.829787
0.95	0.892857	0.968254	0.925373	0.946429	0.648649
1	0.932203	1	0.910448	0.909091	0.813953	0.777778
1	0.970149	0.875	0.932432	0.935484	0.903846	0.910714	0.784314
0.949152	0.966102	0.984127	0.971015	0.925926	0.979167	0.960784	0.941176	0.928571
0.927536	0.957143	1	0.935897	0.955224	0.983333	0.934426	0.935484	0.985915	0.836364
0.929825	0.965517	1	0.985507	0.924528	0.956522	0.96	0.87234	0.964912	0.98	0.833333
1	0.952381	0.970149	0.958904	1	0.941176	0.925926	0.964912	0.968254	0.963636	0.970149	0.857143
0.982759	1	1	1	0.981482	1	1	1	0.982143	1	0.966102	1	1
0.90625	0.970149	0.971429	0.960526	0.984615	1	1	1	0.969697	0.909091	0.941176	0.964912	0.984375	0.86
0.955224	0.970149	0.925373	0.960526	0.952381	0.944444	0.948276	0.983607	0.9375	0.928571	0.956522	1	0.968254	0.882353	0.903226
0.901639	0.984615	1	0.929577	0.967213	1	1	0.982759	0.968254	0.963636	0.970149	1	1	0.851064	0.859649	0.796296
0.938461	1	0.985714	0.96	0.951613	0.981818	0.983051	0.966102	0.953125	0.964912	1	0.982456	0.95082	0.923077	0.864407	0.936508	0.72
0.967742	0.967213	0.918033	1	0.983051	0.98	0.981482	0.981818	0.912281	0.875	1	1	1	0.98	0.872727	0.851852	0.964912	0.910714
1	1	0.965517	1	0.961538	0.928571	0.934783	1	0.981818	1	1	1	0.895833	0.977273	1	0.981818	0.960784	0.962264	0.958333
0.985507	1	0.971429	0.946667	0.935484	0.86	0.910714	0.966667	0.985075	1	1	0.982759	0.968254	0.944444	0.985075	0.953846	0.968254	0.919355	0.966667	0.857143
1	1	1	0.971831	1	0.9375	0.962264	1	0.966667	1	0.96875	0.980769	1	0.9375	0.983607	0.949152	0.946429	0.890909	0.962963	0.913044	0.784314
1	1	1	0.971429	0.946429	0.913044	0.92	0.962264	0.983333	0.960784	0.984375	0.96	0.964286	0.979592	0.948276	0.948276	0.945454	0.965517	0.942308	0.886364	0.849057	0.777778
1	1	1	1	0.981482	1	1	0.98	1	1	1	0.978723	0.981132	1	1	1	0.981132	0.962963	0.9375	1	0.982143	0.914894	0.913044
0.936508	0.984615	1	1	0.983871	0.981132	1	0.982759	1	1	0.970149	0.943396	1	0.941176	1	1	0.966667	0.984127	0.946429	1	0.968254	0.946429	0.945454	0.744186
Bootstrap #44
0.921569
0.894737	0.88
0.953125	0.888889	0.807018
0.981482	0.956522	0.962963	0.947368
0.918033	0.907407	0.953125	0.907692	0.907407
0.897059	0.903226	0.865672	0.947368	0.9375	0.614035
0.939394	0.894737	1	0.943662	0.932203	0.766667	0.814286
1	0.897959	0.949152	0.881356	0.961538	0.951613	0.957746	0.85
0.931034	0.921569	0.967213	0.901639	0.981482	0.9	0.913044	0.813559	0.803922
0.925926	0.914894	0.946429	0.967213	0.959184	0.931034	0.890625	0.918033	0.982143	0.862745
0.967213	1	1	1	0.962963	0.969231	0.972973	0.873016	0.966667	0.894737	0.907407
0.96875	0.964912	0.969231	0.971015	1	0.888889	0.902778	0.878788	0.968254	0.952381	0.983607	0.883333
0.925926	1	1	1	1	1	1	1	0.982143	1	1	1	1
0.929825	1	1	1	0.981132	0.951613	0.957746	1	0.983051	0.983333	0.982143	0.966667	1	0.704545
0.943396	0.979167	0.982143	0.966102	0.911111	0.983051	0.954545	0.984127	0.981482	0.962963	0.980392	1	0.965517	0.96	0.962264
0.836364	1	0.984375	0.985294	0.982143	1	0.986842	0.971429	0.983871	0.95082	0.983051	0.968254	0.953846	0.867924	0.833333	0.884615
0.938461	1	0.985507	0.986301	0.983607	0.957143	0.975	0.945206	0.969697	1	1	0.970588	0.957143	0.859649	0.885246	0.913793	0.775862
0.968254	1	0.984615	1	0.982456	0.970149	0.973684	0.971831	0.984127	0.968254	1	0.96875	0.970149	0.948276	0.877193	0.886792	0.919355	0.857143
1	1	1	1	1	0.958333	0.927273	1	0.977273	1	1	1	0.93617	0.97561	1	0.974359	0.978723	0.980769	0.934783
0.983333	1	0.983607	0.96875	0.92	0.87931	0.911765	0.938461	0.983051	1	1	1	0.951613	0.882353	0.983051	0.942308	0.95	0.953846	0.933333	0.846154
1	1	1	0.966102	1	0.947368	0.985294	1	0.962264	1	0.938775	1	1	0.938775	1	0.958333	0.964286	0.875	0.907407	0.947368	0.877551
1	0.942308	1	0.969231	0.854167	0.935484	0.928571	0.970588	0.983333	1	0.982456	0.983871	0.984615	0.982456	0.948276	0.901961	0.933333	0.954545	0.916667	0.930233	0.826923	0.808511
0.982759	0.938775	0.983051	1	0.938775	1	1	0.984849	0.964286	1	1	0.983051	0.983871	1	1	1	0.983333	0.952381	0.949152	1	0.964286	0.918367	0.886792
0.921875	1	1	1	0.983607	0.957143	1	0.95946	0.985075	0.985294	0.968254	0.955224	0.971831	0.968254	1	1	0.955882	0.972973	0.956522	1	0.969697	0.932203	0.970149	0.754717
Bootstrap #42
0.960784
0.95	0.938775
0.863636	0.967742	0.911765
0.942857	0.967213	0.971831	0.802817
0.929825	0.93617	0.965517	0.819672	0.873016
0.964912	0.909091	0.945454	0.939394	0.921875	0.755556
0.914894	0.888889	1	0.912281	0.929825	0.829268	0.878049
1	1	0.9	0.923077	0.877551	0.95	0.947368	0.896552
0.918367	0.97561	0.980392	0.967742	0.932203	0.888889	0.978723	0.857143	0.9375
0.907407	0.933333	0.964286	0.939394	0.985294	0.962963	0.897959	0.904762	0.974359	0.883721
0.964286	0.978261	1	1	0.969697	1	1	0.902439	1	0.978261	0.94
0.968254	0.92	1	0.958904	1	0.966667	0.983051	0.980392	1	0.981132	0.983051	0.82
0.947368	1	0.982759	0.985714	0.985507	1	0.981482	1	1	1	1	1	1
0.907692	1	0.985507	0.935065	1	0.953846	0.984615	1	0.980392	0.947368	0.952381	0.951613	0.985915	0.759259
0.984615	0.981482	0.984375	0.95946	0.929577	0.913793	0.929825	0.980769	0.978261	0.9	0.966102	1	0.969231	0.912281	0.822581
0.842105	1	0.984375	0.945206	0.972973	1	1	0.960784	1	0.981482	0.983333	1	0.953125	0.851852	0.741379	0.827586
0.918919	1	1	0.94186	0.928571	0.95946	0.986487	0.969231	1	0.954545	1	0.972222	0.9875	0.882353	0.855263	0.948718	0.738462
0.972603	1	0.957746	1	0.975904	0.971429	0.970588	1	0.981818	0.984127	1	0.954545	0.972973	0.971015	0.861111	0.9	0.915493	0.833333
1	1	1	1	1	0.95	0.918919	1	1	1	1	1	0.930233	1	1	1	1	1	0.962963
0.984127	1	1	0.943662	0.972222	0.948276	0.946429	1	1	1	1	0.964286	0.951613	0.888889	0.955882	0.984615	1	0.947368	0.972603	0.928571
1	1	1	0.961039	1	0.952381	0.984127	1	1	1	0.984127	0.967213	1	0.934426	0.972973	0.985714	0.955882	0.802817	0.888889	0.979592	0.789474
1	1	1	0.958333	0.957746	0.948276	0.964912	1	1	0.960784	1	0.964286	0.968254	1	0.971015	0.96875	0.952381	0.933333	0.913044	0.953488	0.836364	0.698113
0.985294	0.982456	0.985075	1	0.960526	1	1	0.981818	1	1	1	0.983871	0.985507	1	1	1	0.955882	0.881579	0.918919	1	0.921875	0.84375	0.789474
0.968254	0.981132	1	1	0.986487	1	1	0.980392	1	1	0.983051	0.964912	1	1	1	1	0.984849	0.948052	0.914286	1	1	0.90625	0.934426	0.679245
Bootstrap #33
0.826087
0.865385	0.913793
0.985075	0.909091	0.915493
0.955556	0.959184	0.962963	0.916667
0.916667	0.921875	0.895522	0.893333	0.872727
0.886792	0.854545	0.885246	0.930556	0.943396	0.603774
0.962963	0.888889	1	0.927536	0.960784	0.732143	0.72549
1	0.944444	0.931034	0.907692	1	0.9375	0.931034	0.843137
0.951613	0.921875	0.957746	0.987805	0.983607	0.90411	0.895522	0.854839	0.847458
0.981482	0.907407	0.95082	0.971831	0.980392	0.939394	0.933333	0.929825	0.945454	0.793103
1	0.982759	1	0.986111	0.980392	0.985507	0.984127	0.966102	0.982456	0.870968	0.846154
0.982759	0.983871	0.969697	0.945206	1	0.927536	0.953846	0.898305	0.983607	0.942857	0.933333	0.877193
1	1	0.980769	1	1	1	0.980769	1	1	1	0.979167	1	1
0.959184	0.962264	0.947368	0.985294	0.978723	1	1	1	0.941176	0.952381	0.923077	0.962963	0.983051	0.846154
0.92	0.964286	0.95	1	0.959184	0.985294	0.983871	1	0.982143	0.938461	0.964912	1	0.967213	1	0.9
0.981132	0.964286	0.983871	0.971429	1	1	0.983871	0.983051	0.982143	0.970149	0.982759	0.982759	0.967213	0.978723	0.921569	0.90566
1	1	0.986667	0.963415	0.967742	0.948718	0.986667	0.986111	0.970588	0.987654	1	1	0.929577	0.948276	0.9375	0.955882	0.754386
0.949152	0.96875	0.940299	1	0.964912	0.945206	0.940299	0.985075	0.984375	0.973333	1	0.953125	0.985714	0.981818	0.875	0.881356	0.952381	0.902778
1	1	0.956522	1	0.941176	0.875	0.909091	1	1	1	1	1	0.956522	1	1	1	0.97619	0.981818	0.914894
0.984375	1	0.957746	0.9625	0.931034	0.84058	0.895522	0.924242	1	1	1	0.985507	0.911765	0.946429	0.918033	0.985294	0.954545	0.948718	0.930556	0.851064
1	1	1	0.953125	1	0.933333	1	1	1	1	0.981132	0.981132	1	0.951219	0.979592	1	0.895833	0.821429	1	0.972973	0.896552
1	1	1	0.951613	0.926829	0.912281	0.962963	0.960784	1	1	0.980392	0.96	0.962963	1	0.933333	0.98	0.9375	0.915254	0.927273	1	0.931034	0.756757
1	0.979167	1	1	1	1	1	1	0.978723	1	1	1	0.961538	1	1	1	0.957447	0.966667	0.944444	1	0.983051	0.926829	0.864865
1	1	1	1	1	0.934426	1	0.943396	1	1	1	1	0.946429	1	1	1	1	1	0.949152	1	0.934426	0.979167	0.931818	0.75
Bootstrap #46
0.883333
0.959184	0.896552
0.917808	0.917647	0.914286
0.87037	0.911765	1	0.938272
0.913793	0.865672	0.983051	0.826667	0.923077
0.918367	0.862069	0.888889	0.885714	0.965517	0.680851
0.925926	0.816667	1	0.878378	0.951613	0.803571	0.76087
1	0.898551	0.846154	0.91358	0.923077	0.956522	0.966667	0.824561
0.964286	0.924242	0.9	0.9625	0.984375	0.901639	0.903846	0.872727	0.824561
0.910714	0.911765	0.945454	0.868421	0.969697	0.90625	0.888889	0.859649	0.939394	0.839286
0.931818	1	1	0.956522	0.897959	1	1	0.9375	1	0.959184	0.897959
1	0.967742	0.956522	0.972973	1	0.947368	0.913044	0.921569	1	0.962264	1	0.926829
0.964912	0.985915	0.981818	0.987952	1	1	0.982456	1	0.969697	1	0.984615	1	1
0.966102	1	0.964286	0.963855	0.985075	1	1	1	0.939394	0.968254	0.9375	0.981132	1	0.705882
1	1	0.963636	0.950617	0.919355	0.954545	0.907407	0.984127	0.938461	0.95082	0.969231	1	0.982143	0.859649	0.883333
0.964286	0.985714	0.981482	0.975309	0.984375	1	0.982143	0.983607	0.953125	0.966667	0.968254	1	1	0.811321	0.773585	0.745098
0.964286	1	0.981482	0.975309	0.984375	0.953125	0.982143	0.966667	0.936508	1	1	0.98	0.962264	0.894737	0.898305	0.933333	0.784314
1	1	0.983051	1	0.970588	0.971429	0.966667	0.984849	0.956522	0.969231	1	1	1	0.920635	0.813559	0.868852	0.919355	0.901639
1	1	1	1	1	0.96	0.894737	1	0.96	1	1	1	0.947368	0.956522	1	0.957447	0.906977	0.906977	0.916667
0.953125	0.987342	0.984127	0.966292	0.972222	0.929577	0.918033	0.985714	0.972973	1	1	1	0.967742	0.892308	0.972222	0.910448	0.890625	0.907692	0.914286	0.833333
1	1	1	0.950617	1	0.904762	0.964912	1	0.970149	1	0.969231	1	1	0.951613	1	0.935484	0.915254	0.792453	0.904762	0.860465	0.762712
1	0.985294	1	0.948052	0.913793	0.934426	0.921569	1	0.968254	0.983051	0.983871	0.979167	0.980769	0.966102	0.913793	0.851852	0.888889	0.928571	0.87931	0.875	0.830508	0.807692
1	0.984615	1	1	0.947368	1	1	0.982143	0.983607	1	1	0.977778	1	1	1	1	1	0.924528	0.949152	1	0.881356	0.865385	0.9
1	0.984849	1	1	0.983333	0.95	1	0.964286	1	1	1	0.978261	0.98	0.982759	1	1	1	0.964286	0.95	1	0.969231	0.928571	0.981818	0.767442
Bootstrap #37
0.810345
0.855072	0.827586
0.905882	0.891892	0.864198
0.955882	0.947368	0.970588	0.849315
0.910448	0.949152	0.909091	0.868421	0.836364
0.911765	0.894737	0.893939	0.925926	0.916667	0.66
0.945206	0.918033	1	0.928571	0.903226	0.833333	0.836066
1	0.964286	0.953846	0.921053	0.928571	0.983607	1	0.9
0.941176	0.966102	0.985714	0.910256	0.913793	0.916667	0.918033	0.830508	0.849057
0.927536	0.932203	0.957143	0.898734	0.934426	0.953125	0.9375	0.907692	0.967213	0.821429
0.968254	0.981132	1	0.973684	0.981818	1	1	0.892857	1	0.944444	0.886792
0.984615	0.962264	0.984375	0.946667	1	0.964912	0.965517	0.967213	1	0.982456	0.983051	0.891304
0.985714	1	0.985507	0.962963	1	1	0.984375	1	1	1	1	1	1
0.929577	0.968254	0.972603	0.940476	1	1	1	1	0.984375	0.969697	0.955224	0.966102	0.983607	0.66
0.921875	0.964286	0.953846	0.921053	0.947368	0.983607	0.983871	0.96875	0.964286	0.910714	0.932203	1	0.981482	0.909091	0.859649
0.923077	0.982759	0.938461	0.935897	0.966102	1	0.967742	0.969231	0.982759	0.949152	0.95082	1	0.981818	0.910714	0.821429	0.907407
0.954545	1	1	0.948718	0.965517	0.949152	0.983871	0.96875	0.982456	0.983333	1	0.961538	0.981482	0.947368	0.87931	1	0.717391
0.952381	0.962264	0.951613	1	0.982143	0.964912	0.965517	1	0.942308	0.982456	1	0.959184	0.980392	0.982143	0.892857	0.921569	0.981818	0.962264
1	1	1	1	1	0.952381	0.928571	1	1	1	1	1	0.972222	1	1	1	0.948718	0.947368	0.942857
1	1	0.971015	0.950617	0.95	0.898305	0.881356	0.954545	1	1	1	0.982143	0.925926	0.932203	0.969697	0.983333	0.931034	0.966102	0.964286	0.837838
1	1	1	0.958333	1	0.9	0.981818	1	0.98	1	1	0.978261	1	1	0.982456	0.98	0.96	0.891304	0.978723	0.9	0.875
1	1	1	0.957746	0.938775	0.897959	0.942308	0.964286	1	0.980769	1	0.977778	1	1	0.944444	0.979592	0.959184	0.958333	0.978261	0.967742	0.822222	0.805556
0.983871	0.980392	0.983607	1	0.961538	1	1	0.983051	1	1	1	0.978723	0.957447	1	1	1	1	0.96	0.957447	1	0.981482	0.977273	0.871795
0.957143	1	1	1	0.984127	0.952381	1	0.970588	0.966667	0.968254	0.969231	0.945454	0.982759	0.967742	1	1	0.983871	0.983607	0.964912	1	0.968254	0.942308	0.981132	0.782609
Bootstrap #35
0.826087
0.865385	0.913793
0.985075	0.909091	0.915493
0.955556	0.959184	0.962963	0.916667
0.916667	0.921875	0.895522	0.893333	0.872727
0.886792	0.854545	0.885246	0.930556	0.943396	0.603774
0.962963	0.888889	1	0.927536	0.960784	0.732143	0.72549
1	0.944444	0.931034	0.907692	1	0.9375	0.931034	0.843137
0.951613	0.921875	0.957746	0.987805	0.983607	0.90411	0.895522	0.854839	0.847458
0.981482	0.907407	0.95082	0.971831	0.980392	0.939394	0.933333	0.929825	0.945454	0.793103
1	0.982759	1	0.986111	0.980392	0.985507	0.984127	0.966102	0.982456	0.870968	0.846154
0.982759	0.983871	0.969697	0.945206	1	0.927536	0.953846	0.898305	0.983607	0.942857	0.933333	0.877193
1	1	0.980769	1	1	1	0.980769	1	1	1	0.979167	1	1
0.959184	0.962264	0.947368	0.985294	0.978723	1	1	1	0.941176	0.952381	0.923077	0.962963	0.983051	0.846154
0.92	0.964286	0.95	1	0.959184	0.985294	0.983871	1	0.982143	0.938461	0.964912	1	0.967213	1	0.9
0.981132	0.964286	0.983871	0.971429	1	1	0.983871	0.983051	0.982143	0.970149	0.982759	0.982759	0.967213	0.978723	0.921569	0.90566
1	1	0.986667	0.963415	0.967742	0.948718	0.986667	0.986111	0.970588	0.987654	1	1	0.929577	0.948276	0.9375	0.955882	0.754386
0.949152	0.96875	0.940299	1	0.964912	0.945206	0.940299	0.985075	0.984375	0.973333	1	0.953125	0.985714	0.981818	0.875	0.881356	0.952381	0.902778
1	1	0.956522	1	0.941176	0.875	0.909091	1	1	1	1	1	0.956522	1	1	1	0.97619	0.981818	0.914894
0.984375	1	0.957746	0.9625	0.931034	0.84058	0.895522	0.924242	1	1	1	0.985507	0.911765	0.946429	0.918033	0.985294	0.954545	0.948718	0.930556	0.851064
1	1	1	0.953125	1	0.933333	1	1	1	1	0.981132	0.981132	1	0.951219	0.979592	1	0.895833	0.821429	1	0.972973	0.896552
1	1	1	0.951613	0.926829	0.912281	0.962963	0.960784	1	1	0.980392	0.96	0.962963	1	0.933333	0.98	0.9375	0.915254	0.927273	1	0.931034	0.756757
1	0.979167	1	1	1	1	1	1	0.978723	1	1	1	0.961538	1	1	1	0.957447	0.966667	0.944444	1	0.983051	0.926829	0.864865
1	1	1	1	1	0.934426	1	0.943396	1	1	1	1	0.946429	1	1	1	1	1	0.949152	1	0.934426	0.979167	0.931818	0.75
Bootstrap #41
0.862069
0.842105	0.888889
0.887324	0.893939	0.893939
0.910714	0.981482	0.942308	0.866667
0.934426	0.964912	0.927273	0.779661	0.897959
0.9	0.947368	0.846154	0.893939	0.942308	0.744681
0.956522	0.935484	1	0.902778	0.966102	0.859649	0.821429
1	0.96875	0.984615	0.887324	0.983333	0.968254	0.96875	0.83871
0.953125	1	1	0.927536	0.962963	0.983051	0.929825	0.883333	0.824561
0.867924	0.941176	1	0.919355	0.957447	0.960784	0.941176	0.965517	0.965517	0.854167
0.984127	0.982456	1	0.985714	0.980769	1	1	0.896552	1	0.927273	0.938775
0.951613	0.946429	0.982759	0.971429	1	0.964286	0.946429	0.898305	1	0.947368	0.980769	0.944444
1	1	0.982143	0.970588	0.916667	1	0.982143	1	0.967213	1	0.98	1	1
0.964912	0.980769	0.980769	0.952381	1	0.980392	0.980769	1	0.946429	0.981132	0.978261	0.98	0.980392	0.780488
0.985714	0.968254	0.968254	0.96	0.867924	0.967742	0.951613	1	0.924242	0.918033	0.946429	1	0.967742	0.830189	0.884615
0.942029	0.984849	0.953125	0.974359	0.931034	1	0.969231	1	0.942029	0.9375	0.966102	0.968254	0.952381	0.877193	0.928571	0.83871
0.986111	1	1	0.933333	1	0.935484	1	0.971831	0.926471	1	1	0.984375	1	0.933333	0.909091	0.956522	0.786885
0.9375	0.983607	0.966667	1	0.963636	0.983333	0.983607	0.985075	0.920635	0.983871	1	0.947368	0.948276	0.946429	0.877551	0.883333	0.904762	0.921875
1	1	0.953488	1	0.947368	0.926829	0.953488	1	0.959184	1	1	1	0.952381	0.95	1	0.958333	0.893617	0.893617	0.931818
0.985915	1	0.935484	0.974026	0.948276	0.87931	0.918033	0.956522	0.971429	1	1	1	0.951613	0.913793	1	0.955882	0.893939	0.876923	0.953846	0.725
1	1	1	0.930556	1	0.894737	0.984127	1	0.955224	1	0.964286	1	1	0.929825	1	0.954545	0.924242	0.732143	0.935484	0.833333	0.75
1	0.981818	1	0.921875	0.959184	0.877551	0.943396	0.983607	0.966667	1	1	1	0.942308	0.960784	1	0.929825	0.967213	0.894737	0.84	0.891892	0.872727	0.77551
0.983871	0.982143	0.982143	1	0.980392	1	1	0.983871	1	1	1	0.981482	0.981818	1	1	1	1	0.967742	0.886792	1	0.967213	0.948276	0.795455
0.986667	0.939394	1	1	0.984375	0.954545	1	0.958904	0.986667	0.985714	0.984127	0.969697	0.970149	1	1	1	1	0.986842	0.909091	1	0.944444	0.957746	0.9	0.735849
Bootstrap #39
0.810345
0.855072	0.827586
0.905882	0.891892	0.864198
0.955882	0.947368	0.970588	0.849315
0.910448	0.949152	0.909091	0.868421	0.836364
0.911765	0.894737	0.893939	0.925926	0.916667	0.66
0.945206	0.918033	1	0.928571	0.903226	0.833333	0.836066
1	0.964286	0.953846	0.921053	0.928571	0.983607	1	0.9
0.941176	0.966102	0.985714	0.910256	0.913793	0.916667	0.918033	0.830508	0.849057
0.927536	0.932203	0.957143	0.898734	0.934426	0.953125	0.9375	0.907692	0.967213	0.821429
0.968254	0.981132	1	0.973684	0.981818	1	1	0.892857	1	0.944444	0.886792
0.984615	0.962264	0.984375	0.946667	1	0.964912	0.965517	0.967213	1	0.982456	0.983051	0.891304
0.985714	1	0.985507	0.962963	1	1	0.984375	1	1	1	1	1	1
0.929577	0.968254	0.972603	0.940476	1	1	1	1	0.984375	0.969697	0.955224	0.966102	0.983607	0.66
0.921875	0.964286	0.953846	0.921053	0.947368	0.983607	0.983871	0.96875	0.964286	0.910714	0.932203	1	0.981482	0.909091	0.859649
0.923077	0.982759	0.938461	0.935897	0.966102	1	0.967742	0.969231	0.982759	0.949152	0.95082	1	0.981818	0.910714	0.821429	0.907407
0.954545	1	1	0.948718	0.965517	0.949152	0.983871	0.96875	0.982456	0.983333	1	0.961538	0.981482	0.947368	0.87931	1	0.717391
0.952381	0.962264	0.951613	1	0.982143	0.964912	0.965517	1	0.942308	0.982456	1	0.959184	0.980392	0.982143	0.892857	0.921569	0.981818	0.962264
1	1	1	1	1	0.952381	0.928571	1	1	1	1	1	0.972222	1	1	1	0.948718	0.947368	0.942857
1	1	0.971015	0.950617	0.95	0.898305	0.881356	0.954545	1	1	1	0.982143	0.925926	0.932203	0.969697	0.983333	0.931034	0.966102	0.964286	0.837838
1	1	1	0.958333	1	0.9	0.981818	1	0.98	1	1	0.978261	1	1	0.982456	0.98	0.96	0.891304	0.978723	0.9	0.875
1	1	1	0.957746	0.938775	0.897959	0.942308	0.964286	1	0.980769	1	0.977778	1	1	0.944444	0.979592	0.959184	0.958333	0.978261	0.967742	0.822222	0.805556
0.983871	0.980392	0.983607	1	0.961538	1	1	0.983051	1	1	1	0.978723	0.957447	1	1	1	1	0.96	0.957447	1	0.981482	0.977273	0.871795
0.957143	1	1	1	0.984127	0.952381	1	0.970588	0.966667	0.968254	0.969231	0.945454	0.982759	0.967742	1	1	0.983871	0.983607	0.964912	1	0.968254	0.942308	0.981132	0.782609
Bootstrap #48
0.883333
0.959184	0.896552
0.917808	0.917647	0.914286
0.87037	0.911765	1	0.938272
0.913793	0.865672	0.983051	0.826667	0.923077
0.918367	0.862069	0.888889	0.885714	0.965517	0.680851
0.925926	0.816667	1	0.878378	0.951613	0.803571	0.76087
1	0.898551	0.846154	0.91358	0.923077	0.956522	0.966667	0.824561
0.964286	0.924242	0.9	0.9625	0.984375	0.901639	0.903846	0.872727	0.824561
0.910714	0.911765	0.945454	0.868421	0.969697	0.90625	0.888889	0.859649	0.939394	0.839286
0.931818	1	1	0.956522	0.897959	1	1	0.9375	1	0.959184	0.897959
1	0.967742	0.956522	0.972973	1	0.947368	0.913044	0.921569	1	0.962264	1	0.926829
0.964912	0.985915	0.981818	0.987952	1	1	0.982456	1	0.969697	1	0.984615	1	1
0.966102	1	0.964286	0.963855	0.985075	1	1	1	0.939394	0.968254	0.9375	0.981132	1	0.705882
1	1	0.963636	0.950617	0.919355	0.954545	0.907407	0.984127	0.938461	0.95082	0.969231	1	0.982143	0.859649	0.883333
0.964286	0.985714	0.981482	0.975309	0.984375	1	0.982143	0.983607	0.953125	0.966667	0.968254	1	1	0.811321	0.773585	0.745098
0.964286	1	0.981482	0.975309	0.984375	0.953125	0.982143	0.966667	0.936508	1	1	0.98	0.962264	0.894737	0.898305	0.933333	0.784314
1	1	0.983051	1	0.970588	0.971429	0.966667	0.984849	0.956522	0.969231	1	1	1	0.920635	0.813559	0.868852	0.919355	0.901639
1	1	1	1	1	0.96	0.894737	1	0.96	1	1	1	0.947368	0.956522	1	0.957447	0.906977	0.906977	0.916667
0.953125	0.987342	0.984127	0.966292	0.972222	0.929577	0.918033	0.985714	0.972973	1	1	1	0.967742	0.892308	0.972222	0.910448	0.890625	0.907692	0.914286	0.833333
1	1	1	0.950617	1	0.904762	0.964912	1	0.970149	1	0.969231	1	1	0.951613	1	0.935484	0.915254	0.792453	0.904762	0.860465	0.762712
1	0.985294	1	0.948052	0.913793	0.934426	0.921569	1	0.968254	0.983051	0.983871	0.979167	0.980769	0.966102	0.913793	0.851852	0.888889	0.928571	0.87931	0.875	0.830508	0.807692
1	0.984615	1	1	0.947368	1	1	0.982143	0.983607	1	1	0.977778	1	1	1	1	1	0.924528	0.949152	1	0.881356	0.865385	0.9
1	0.984849	1	1	0.983333	0.95	1	0.964286	1	1	1	0.978261	0.98	0.982759	1	1	1	0.964286	0.95	1	0.969231	0.928571	0.981818	0.767442
Bootstrap #43
0.833333
0.877193	0.875
0.939394	0.904762	0.888889
0.87234	0.893617	1	0.964912
0.938775	0.914894	0.96	0.945454	0.921053
0.90566	0.924528	0.84	0.95082	0.978261	0.647059
0.983051	0.946429	1	0.9	0.957447	0.909091	0.897959
1	0.966667	0.95	0.887097	0.980392	0.98	0.982143	0.770833
1	0.981482	0.981818	0.931034	0.928571	0.976744	0.958333	0.938775	0.777778
0.984615	0.951613	0.96875	0.909091	0.962264	0.961538	0.947368	0.966667	0.968254	0.884615
0.95082	0.983871	1	0.970588	0.918367	0.980392	0.982456	0.823529	0.983871	0.923077	0.918033
1	0.9375	0.96	0.945454	1	0.947368	0.904762	0.933333	0.98	0.952381	0.981132	0.916667
0.968254	0.984127	0.968254	1	0.961538	1	0.964912	1	0.984127	1	0.984849	1	1
0.903846	0.981818	0.982143	0.967213	1	0.953488	0.98	1	1	0.957447	0.964912	0.982143	1	0.84
0.948276	0.965517	0.948276	0.984849	0.958333	0.957447	0.981482	1	0.947368	0.960784	0.983871	1	0.957447	0.872727	0.875
0.921875	0.969697	0.985294	0.943662	0.964286	1	0.983871	0.984375	0.969697	0.966102	0.985714	0.985294	0.982143	0.833333	0.784314	0.8
0.941176	1	0.985915	0.96	0.983333	0.965517	0.984615	0.953846	0.985714	0.984127	1	0.971429	0.909091	0.910448	0.898305	0.954545	0.758065
0.982143	0.981818	0.963636	1	1	0.953488	0.959184	0.980769	0.923077	0.957447	1	0.944444	1	0.982456	0.837209	0.897959	0.949152	0.934426
1	1	1	1	1	0.941176	0.923077	1	0.978261	1	1	1	1	0.979167	1	0.977273	0.918367	0.923077	0.921053
0.984615	0.984375	0.984615	0.956522	0.981482	0.92	0.909091	0.983607	0.984375	1	1	1	0.961538	0.936508	0.982759	0.95	0.907692	0.861538	0.927273	0.809524
1	1	1	0.971429	1	0.941176	0.983051	1	0.951613	1	1	1	1	0.953125	1	0.967213	0.890625	0.84375	0.982759	0.888889	0.807018
1	1	1	0.964912	0.97561	0.921053	0.955556	0.979167	0.980392	0.977273	1	1	1	0.981132	0.954545	0.93617	0.925926	0.948276	0.85	0.942857	0.854167	0.829787
0.962963	0.942308	0.962963	1	0.977273	1	1	0.980392	0.981482	1	1	0.981818	1	1	1	1	0.983333	0.95082	0.911111	1	1	0.964286	0.846154
0.983607	1	1	1	0.98	0.979592	1	0.982456	1	1	1	0.983607	1	0.983871	1	1	0.984849	1	0.921569	1	1	0.967742	0.891304	0.744186
Bootstrap #50
0.857143
0.864407	0.907407
0.958333	0.936508	0.901408
0.90625	0.966667	0.926471	0.808824
1	1	0.910714	0.830508	0.836364
0.952381	0.964286	0.904762	0.930556	0.925373	0.636364
1	0.955556	1	0.918033	0.929825	0.886364	0.836735
1	0.982456	0.887097	0.915493	0.925373	0.928571	0.903226	0.836735
0.981818	1	0.927273	0.864407	0.912281	1	0.964286	0.880952	0.862745
0.955224	0.949152	0.910448	0.875	0.898551	1	0.985915	0.966102	0.941176	0.784314
0.958333	0.953125	1	0.988235	0.92	0.970149	0.973333	0.9	0.973333	0.919355	0.905405
0.963636	1	0.983051	0.985075	1	0.9375	0.927273	0.857143	0.964912	0.934783	0.983871	0.885246
1	1	0.981818	0.984127	0.982759	1	0.981482	1	0.942308	1	0.982759	1	1
0.952381	0.945454	0.938461	0.973333	0.971429	0.983051	0.985075	1	0.953846	0.945454	0.909091	0.945206	0.982759	0.804348
0.948276	0.94	0.915254	0.941176	0.936508	0.962264	0.967213	0.96	0.932203	0.918367	0.953125	1	0.961538	0.888889	0.875
0.928571	1	0.967213	0.971015	0.952381	1	0.983607	0.959184	0.949152	0.916667	0.96875	0.971015	0.960784	0.886364	0.931034	0.836735
1	1	0.983607	0.985507	0.984375	0.980769	1	0.958333	0.910714	1	1	0.985507	0.938775	0.883721	0.910714	0.901961	0.829787
0.927536	0.952381	0.945206	1	0.987342	0.9375	0.944444	0.984375	0.914286	0.984615	1	0.9375	0.969231	0.913793	0.848485	0.836066	0.888889	0.868852
1	1	0.962264	1	0.964286	0.85	0.897959	1	0.941176	1	1	1	0.977273	0.921053	1	0.934783	0.909091	0.906977	0.872727
0.96875	1	0.954545	0.973333	0.941176	0.846154	0.885246	0.982143	0.953846	1	1	0.986842	0.982759	0.9	0.969697	0.913793	0.892857	0.910714	0.882353	0.65
1	1	1	0.972603	1	0.945454	0.984615	1	0.935484	1	0.985507	0.986487	1	0.918367	0.984615	0.929825	0.928571	0.843137	0.911765	0.869565	0.777778
1	0.98	1	0.970588	0.934426	0.94	0.966102	0.979592	0.948276	1	0.968254	0.955224	0.980392	0.933333	0.929825	0.901961	0.921569	0.92	0.904762	0.853659	0.78	0.717391
0.983333	0.980769	0.984127	1	0.969231	1	1	0.980392	1	1	1	0.985915	1	1	1	1	1	0.962963	0.985714	1	0.967213	0.948276	0.923077
0.964912	0.98	1	1	0.984375	0.980769	1	0.979592	1	1	1	0.985507	1	1	1	1	0.962264	0.981132	0.985294	1	0.983333	0.946429	0.981132	0.755556
Bootstrap #47
0.982759
0.921569	0.846154
0.912281	0.864407	0.811321
0.941176	0.964912	1	0.830189
0.941176	0.946429	1	0.807692	0.875
0.967742	0.921875	0.898305	0.892308	0.896552	0.769231
0.946429	0.967742	1	0.936508	0.946429	0.843137	0.830508
1	0.983051	0.923077	0.894737	0.942308	0.942308	0.951613	0.75
0.948276	0.96875	0.931034	0.921875	0.966102	0.929825	0.940299	0.730769	0.76
0.923077	0.958333	0.940299	0.931507	0.939394	0.985507	0.933333	0.928571	0.924242	0.850746
0.962264	0.965517	1	1	0.942308	0.981482	0.984375	0.965517	0.981818	0.892857	0.907692
0.980392	0.924528	0.94	0.947368	1	0.893617	0.851852	0.882353	0.980769	0.946429	0.969697	0.94
1	0.982143	1	0.983051	1	1	1	1	0.960784	1	0.969697	1	1
0.967742	0.985294	0.934426	0.925373	0.967742	1	1	1	0.951613	0.940299	0.918919	0.934426	0.983607	0.807692
0.98	0.981818	0.980392	0.946429	0.891304	0.98	0.948276	0.981818	0.916667	0.884615	0.936508	1	0.979167	0.911111	0.948276
0.964912	0.984127	0.965517	0.953125	0.982759	1	0.985294	0.967742	0.928571	0.935484	0.958333	0.983051	0.963636	0.944444	0.887097	0.857143
0.983333	1	1	0.904762	0.983333	0.849057	0.955882	1	0.966667	1	1	1	0.927273	0.964912	0.940299	0.964286	0.862069
0.96	0.982143	0.960784	1	0.96	1	1	1	0.960784	1	1	0.980769	0.979592	0.93617	0.949152	0.886364	0.944444	0.886792
1	1	1	1	1	1	0.977273	1	0.941176	1	1	1	1	0.935484	1	0.933333	0.947368	0.95	0.935484
1	0.983871	0.982759	0.984615	0.982456	0.964286	0.953846	0.983871	0.964912	1	1	0.982759	1	0.923077	0.953846	0.942308	0.95	0.916667	0.962963	0.916667
1	1	1	0.898305	1	0.86	0.984849	1	0.945454	1	0.986111	0.982456	1	0.962264	0.984849	0.941176	0.931034	0.792453	0.854167	0.914286	0.910714
1	0.952381	1	0.904762	0.910714	0.87037	0.940299	0.984615	0.966667	0.985075	0.973333	0.949152	0.964912	0.964912	0.940299	0.90566	0.952381	0.885246	0.886792	0.923077	0.898305	0.72
1	1	1	1	1	1	1	1	1	1	1	1	0.979167	1	1	1	1	0.945454	0.934783	1	1	0.961538	0.90566
0.98	0.981818	1	1	1	0.98	1	1	1	1	0.984849	0.980392	1	1	1	1	1	0.964286	0.934783	1	0.962264	0.941176	0.982456	0.769231
Bootstrap #54
0.913793
0.877193	0.85
0.865672	0.92	0.876712
0.915254	0.970149	0.939394	0.861111
0.962963	0.929825	0.892857	0.861538	0.807692
0.877193	0.887097	0.813559	0.921053	0.955224	0.76
0.98	0.943396	1	0.921875	0.924528	0.833333	0.882353
1	0.983333	0.931034	0.895522	0.931034	0.941176	0.966667	0.911111
0.942308	0.947368	0.966102	0.957143	0.983333	0.960784	0.948276	0.933333	0.822222
0.931034	0.919355	0.985075	0.933333	0.985075	0.947368	0.9375	0.942308	0.928571	0.795918
0.947368	0.968254	1	0.973684	0.9	1	1	0.895833	1	0.903846	0.857143
0.983333	0.952381	0.969231	0.917808	1	0.946429	0.936508	0.941176	1	0.964286	0.984375	0.854545
1	0.965517	1	1	0.966102	1	1	1	0.94	1	1	1	1
0.942308	0.965517	0.948276	0.971831	0.983333	0.960784	0.983333	1	0.980769	0.96	0.964912	0.944444	1	0.844445
0.95082	0.970149	0.939394	0.987654	0.939394	0.949152	0.955224	1	0.851852	0.910714	0.953846	1	1	0.803922	0.910714
0.96875	1	0.941176	0.987952	0.971429	1	0.956522	0.982759	0.896552	0.894737	0.955224	0.953846	0.970149	0.811321	0.913793	0.736842
0.983871	1	1	0.9875	0.954545	0.983333	0.985294	0.923077	0.948276	0.983051	1	0.984375	0.984615	0.928571	0.965517	0.904762	0.854839
0.955882	0.972973	0.915493	1	0.986842	0.970149	0.973333	0.95082	0.887097	0.969697	1	0.957143	0.986301	0.920635	0.866667	0.833333	0.932432	0.8125
1	1	0.981132	1	0.981132	0.930233	0.92	1	0.930233	1	1	1	0.9375	0.928571	1	0.941176	0.923077	0.918367	0.910714
1	0.973333	0.945946	0.941176	0.96	0.923077	0.916667	0.984375	0.955224	1	1	0.986301	0.928571	0.904762	0.954545	0.945946	0.90411	0.9	0.9375	0.830189
1	1	1	0.985714	1	0.98	0.982759	1	0.914894	1	1	0.981482	1	0.913044	0.979592	0.927273	0.929825	0.862745	0.918033	0.897436	0.824561
1	0.985714	1	0.987952	0.941176	0.984127	0.971429	1	0.95082	0.983871	0.985507	0.969697	1	0.95	0.932203	0.925373	0.927536	0.955882	0.932432	0.901961	0.84058	0.702128
1	1	1	1	0.921569	1	1	0.95	1	1	1	0.959184	1	1	1	1	1	1	1	1	0.95	0.952381	0.787234
1	0.982143	1	1	0.964286	0.979592	1	0.928571	1	1	1	0.961538	0.981482	0.934783	1	1	1	1	1	1	0.96875	0.955556	0.965517	0.805556
Bootstrap #45
0.884615
0.909091	0.897959
0.971015	0.934426	0.901639
0.946429	0.980769	0.942308	0.881356
0.982759	0.960784	0.942308	0.862069	0.8
0.915254	0.90566	0.8	0.924242	0.946429	0.717391
0.983333	0.942308	1	0.885246	0.833333	0.833333	0.803922
1	0.956522	0.837209	0.826923	0.911111	0.911111	0.981132	0.866667
0.984127	0.945454	0.909091	0.907692	0.964912	0.946429	0.95082	0.929825	0.826087
0.916667	0.964912	0.948276	0.875	0.947368	0.965517	0.968254	0.931034	0.921569	0.818182
0.968254	1	1	0.985915	0.928571	1	1	0.892857	1	0.898305	0.881356
0.896552	0.945454	0.983051	0.955882	1	0.946429	0.915254	0.948276	1	0.95082	0.968254	0.934426
0.96875	0.928571	0.983607	0.971831	1	1	0.984615	1	0.981818	1	0.969231	1	1
0.958333	0.985294	0.940299	0.935065	0.985507	0.955224	0.972603	1	0.951613	0.943662	0.929577	0.944444	1	0.737705
0.945454	0.96	0.961538	0.934426	0.980769	0.960784	0.982456	0.981482	0.933333	0.945454	0.964912	1	0.982456	0.947368	0.904762
0.816667	0.968254	0.969231	0.96	0.984615	1	0.971015	0.969697	0.966102	0.955882	0.971429	0.985915	0.890625	0.910448	0.84507	0.898305
0.967742	1	1	0.985714	0.964912	0.927273	0.95082	0.966102	0.981132	1	1	0.984375	0.95082	0.881356	0.913044	0.964286	0.836066
0.883333	0.983333	0.95	1	1	0.983607	0.984849	0.984127	0.944444	0.984849	1	0.985075	0.901639	0.970149	0.901408	0.910714	0.861538	0.844828
1	1	0.921053	1	0.918919	0.888889	0.928571	1	0.970588	1	1	1	0.953488	0.978261	1	0.973684	0.980392	0.977273	0.956522
0.986111	0.936508	0.921875	0.961039	0.920635	0.885246	0.910448	0.970588	0.983871	1	1	0.972222	0.971831	0.913044	0.962963	0.953125	0.947368	0.957143	0.958904	0.851064
1	1	1	0.96875	1	0.961538	0.982759	1	0.957447	1	1	0.965517	1	0.966102	0.970588	0.960784	0.96875	0.795918	0.892857	0.947368	0.903226
1	0.981818	1	0.970149	0.944444	0.924528	0.949152	0.964912	0.980392	0.983607	0.983871	0.95	0.983607	0.984127	0.910448	0.943396	0.921875	0.949152	0.934426	0.925	0.775862	0.76087
0.981818	0.979592	0.980392	1	0.959184	1	1	0.960784	1	1	1	0.963636	0.923077	1	1	1	0.983871	0.901961	0.907407	1	0.968254	0.866667	0.897959
0.934426	1	1	1	0.965517	1	1	0.966667	1	1	0.984615	0.952381	1	1	1	1	0.956522	0.934426	0.920635	1	0.986301	0.909091	0.967213	0.787234
Bootstrap #52
0.87931
0.851852	0.849057
0.857143	0.907692	0.847458
0.927273	0.945454	0.942308	0.818182
1	0.962963	0.918367	0.913793	0.837209
0.964912	0.925926	0.9	0.951613	0.938775	0.780488
1	0.927273	1	0.935484	0.960784	0.866667	0.822222
1	0.94	0.958333	0.947368	0.978261	0.977273	0.978261	0.829268
0.96875	0.968254	0.966667	0.956522	0.927273	0.982143	0.946429	0.909091	0.897959
0.942857	0.957143	0.970588	0.947368	0.953125	0.984375	0.953125	0.969697	0.966667	0.786885
0.983333	0.965517	1	0.984849	1	1	1	0.962264	1	0.890909	0.868852
0.969231	0.96875	0.983871	0.971831	1	0.90566	0.983051	0.910714	1	0.919355	0.928571	0.912281
1	0.961538	0.98	0.983333	0.978723	1	0.978723	1	0.951219	1	0.95	1	1
1	1	1	0.983333	1	0.954545	1	1	0.97619	0.921569	0.932203	0.888889	0.943396	0.9
1	0.985075	1	0.972603	0.949152	0.947368	0.966667	0.983871	0.944444	0.868852	0.930556	1	0.939394	0.862745	0.884615
0.925926	0.982143	0.981132	0.967742	0.959184	1	1	0.980392	0.930233	0.945454	0.96875	0.980769	0.964912	0.825	0.955556	0.849057
1	1	1	0.985507	0.963636	0.981482	1	0.964286	0.938775	0.984127	1	0.982759	0.984375	0.94	0.960784	0.953125	0.901961
0.964912	1	1	1	1	0.979592	0.980392	0.980769	0.906977	0.946429	1	0.941176	0.965517	0.956522	0.933333	0.949152	0.914894	0.8125
1	1	0.979167	1	0.977778	0.952381	0.954545	1	0.948718	1	1	1	0.875	0.95	1	0.962963	0.928571	0.9375	0.930233
0.971429	0.971015	0.985075	0.987013	0.951613	0.894737	0.968254	0.935484	0.965517	1	1	0.953125	0.942029	0.929825	0.890909	0.972603	0.95082	0.955224	0.951613	0.843137
1	1	1	0.984849	1	0.980392	1	1	0.934783	1	1	0.943396	1	0.958333	0.93617	0.967742	0.918367	0.795918	0.92	0.883721	0.803571
1	0.983871	1	0.985507	0.944444	0.962264	0.963636	0.982456	0.96	1	1	0.946429	0.984375	0.960784	0.94	0.953125	0.943396	0.931034	0.963636	0.891304	0.813559	0.744681
0.963636	0.962963	0.960784	1	0.979592	1	1	1	1	1	1	1	1	1	1	1	0.979167	0.9	0.958333	1	0.967213	0.916667	0.877551
0.945454	0.982143	1	1	1	0.934783	1	0.938775	1	1	0.984615	0.980769	0.946429	0.955556	1	1	0.958333	0.962963	0.959184	1	0.95082	0.960784	1	0.860465
Bootstrap #49
0.9375
0.87234	0.943396
0.913793	0.935484	0.920635
0.893617	0.921569	0.924528	0.803571
1	0.92	0.901961	0.8	0.72093
0.94	0.923077	0.90566	0.903226	0.924528	0.808511
1	0.909091	1	0.956522	0.948276	0.888889	0.851852
1	0.921569	0.903846	0.919355	0.923077	0.962264	0.982143	0.87037
0.980392	0.921569	0.944444	0.953125	0.981818	0.9	0.86	0.826923	0.755556
0.927273	0.931034	0.967742	0.942857	0.983871	0.949152	0.896552	0.920635	0.967213	0.875
0.958333	0.980769	1	0.951613	0.961538	1	1	0.865385	1	0.961538	0.910714
1	0.931818	0.934783	0.982759	1	0.978261	0.957447	0.918367	1	0.978723	1	0.930233
0.978261	0.958333	1	0.983607	1	1	1	1	0.959184	1	1	1	1
0.979167	1	1	0.984127	1	0.980392	1	1	1	1	1	0.98	1	0.702703
0.963636	0.965517	0.931034	0.956522	1	0.928571	0.949152	1	0.929825	1	1	1	0.918367	0.923077	0.945454
0.981132	0.963636	0.927273	0.970149	1	1	0.982759	0.983871	0.964286	1	1	1	0.979592	0.918367	0.921569	0.913793
0.982759	1	0.967742	0.986301	1	0.983607	1	0.953846	0.967213	1	1	0.966102	0.962264	0.90566	0.965517	0.903226	0.773585
1	1	0.942308	1	1	1	1	0.982759	0.897959	0.981132	1	1	1	0.911111	0.914894	0.886792	0.943396	0.849057
1	1	0.930233	1	0.928571	0.926829	0.930233	1	0.953488	1	1	1	0.878788	0.947368	1	0.958333	0.955556	0.96	0.951219
0.949152	0.968254	0.936508	0.973333	0.952381	0.898305	0.953125	0.985714	0.96875	1	1	0.984127	0.982456	0.890909	0.95	0.940299	0.953846	0.910448	0.967742	0.877551
1	1	1	0.955882	1	0.946429	0.966102	1	0.947368	1	0.953125	0.982456	1	0.921569	0.982143	0.934426	0.931034	0.803571	0.90566	0.934783	0.833333
1	1	1	0.953846	1	0.943396	0.964286	1	0.963636	0.982143	1	0.981482	1	0.96	0.961538	0.931034	0.927273	0.933333	0.921569	0.904762	0.844828	0.729167
0.980392	0.962264	0.982143	1	0.981818	1	1	0.983333	0.981818	1	1	0.981132	1	1	1	1	0.982456	0.95	0.941176	1	0.96875	0.947368	0.903846
0.983051	0.95	1	1	0.984127	0.983871	1	0.970149	0.95082	0.95082	0.985714	0.966667	0.981818	1	1	1	1	0.971015	0.949152	1	0.986301	0.969697	0.984375	0.693878
Bootstrap #56
0.897959
0.877193	0.870968
0.881356	0.819672	0.828571
0.909091	0.935484	0.958904	0.885714
0.957447	0.962264	0.916667	0.901639	0.803922
0.919355	0.926471	0.830986	0.924051	0.902778	0.785714
0.980769	0.964912	1	0.907692	0.934426	0.851064	0.819672
1	0.967213	0.942029	0.928571	0.887097	0.945454	0.929577	0.830189
1	0.962963	0.96875	1	1	0.9375	0.954545	0.877551	0.843137
0.982143	0.967213	0.986111	0.986487	0.985294	0.964286	0.865672	0.931034	0.96875	0.927273
0.979167	1	1	1	0.948276	0.979592	0.985075	0.897959	0.982456	0.866667	0.964286
0.982759	0.87931	0.928571	0.945206	1	0.983051	0.916667	0.915254	0.985075	0.948276	0.985075	0.909091
1	0.960784	0.983871	0.984375	0.982759	1	0.984615	1	0.981818	1	0.981818	1	1
0.957447	0.981482	0.984375	0.969231	0.983333	1	1	1	0.964286	0.98	0.90566	0.93617	1	0.933333
0.980769	0.946429	0.938461	0.985714	0.968254	0.981132	0.971429	1	0.949152	0.942308	0.983607	1	0.933333	0.893617	0.897959
0.946429	0.951613	0.913044	0.945206	0.985714	1	0.945946	1	0.969697	0.948276	0.985075	0.965517	0.985507	0.925926	0.909091	0.836364
0.98	1	0.969231	0.970149	1	0.980392	1	0.962963	0.947368	1	1	0.96	0.912281	0.958333	0.869565	0.923077	0.851852
0.959184	0.982143	0.953125	1	1	0.980392	0.985507	1	0.947368	0.980769	1	0.938775	0.983607	0.979592	0.869565	0.88	0.912281	0.897959
1	1	0.960784	1	0.957447	0.914286	0.981818	1	0.977778	1	1	1	0.933333	0.971429	1	0.97561	0.956522	0.947368	0.947368
1	0.972222	0.923077	0.988235	0.933333	0.921875	0.9125	0.971831	0.986842	1	1	0.970149	0.987179	0.919355	0.938461	0.957143	0.887324	0.955882	0.940299	0.903846
1	1	1	0.985507	1	0.960784	1	1	0.983333	1	0.983333	0.960784	1	0.959184	0.960784	0.982143	0.932203	0.829787	0.942308	0.948718	0.819672
1	0.983051	1	0.985915	0.918033	0.942308	0.957143	0.964912	0.983871	0.981818	0.983871	0.942308	1	0.980769	0.877551	0.927273	0.898305	0.924528	0.882353	0.951219	0.861538	0.791667
1	0.982759	1	1	0.968254	1	1	0.982456	0.983607	1	1	0.981132	1	1	1	1	0.967742	0.943396	0.943396	1	0.942029	0.86	0.795918
0.978261	1	1	1	0.982759	0.978723	1	0.980392	0.962963	0.957447	1	0.978723	1	0.954545	1	1	0.982456	0.979592	0.93617	1	1	0.914894	0.918367	0.761905
Bootstrap #53
0.897959
0.877193	0.870968
0.881356	0.819672	0.828571
0.909091	0.935484	0.958904	0.885714
0.957447	0.962264	0.916667	0.901639	0.803922
0.919355	0.926471	0.830986	0.924051	0.902778	0.785714
0.980769	0.964912	1	0.907692	0.934426	0.851064	0.819672
1	0.967213	0.942029	0.928571	0.887097	0.945454	0.929577	0.830189
1	0.962963	0.96875	1	1	0.9375	0.954545	0.877551	0.843137
0.982143	0.967213	0.986111	0.986487	0.985294	0.964286	0.865672	0.931034	0.96875	0.927273
0.979167	1	1	1	0.948276	0.979592	0.985075	0.897959	0.982456	0.866667	0.964286
0.982759	0.87931	0.928571	0.945206	1	0.983051	0.916667	0.915254	0.985075	0.948276	0.985075	0.909091
1	0.960784	0.983871	0.984375	0.982759	1	0.984615	1	0.981818	1	0.981818	1	1
0.957447	0.981482	0.984375	0.969231	0.983333	1	1	1	0.964286	0.98	0.90566	0.93617	1	0.933333
0.980769	0.946429	0.938461	0.985714	0.968254	0.981132	0.971429	1	0.949152	0.942308	0.983607	1	0.933333	0.893617	0.897959
0.946429	0.951613	0.913044	0.945206	0.985714	1	0.945946	1	0.969697	0.948276	0.985075	0.965517	0.985507	0.925926	0.909091	0.836364
0.98	1	0.969231	0.970149	1	0.980392	1	0.962963	0.947368	1	1	0.96	0.912281	0.958333	0.869565	0.923077	0.851852
0.959184	0.982143	0.953125	1	1	0.980392	0.985507	1	0.947368	0.980769	1	0.938775	0.983607	0.979592	0.869565	0.88	0.912281	0.897959
1	1	0.960784	1	0.957447	0.914286	0.981818	1	0.977778	1	1	1	0.933333	0.971429	1	0.97561	0.956522	0.947368	0.947368
1	0.972222	0.923077	0.988235	0.933333	0.921875	0.9125	0.971831	0.986842	1	1	0.970149	0.987179	0.919355	0.938461	0.957143	0.887324	0.955882	0.940299	0.903846
1	1	1	0.985507	1	0.960784	1	1	0.983333	1	0.983333	0.960784	1	0.959184	0.960784	0.982143	0.932203	0.829787	0.942308	0.948718	0.819672
1	0.983051	1	0.985915	0.918033	0.942308	0.957143	0.964912	0.983871	0.981818	0.983871	0.942308	1	0.980769	0.877551	0.927273	0.898305	0.924528	0.882353	0.951219	0.861538	0.791667
1	0.982759	1	1	0.968254	1	1	0.982456	0.983607	1	1	0.981132	1	1	1	1	0.967742	0.943396	0.943396	1	0.942029	0.86	0.795918
0.978261	1	1	1	0.982759	0.978723	1	0.980392	0.962963	0.957447	1	0.978723	1	0.954545	1	1	0.982456	0.979592	0.93617	1	1	0.914894	0.918367	0.761905
Bootstrap #51
0.9375
0.87234	0.943396
0.913793	0.935484	0.920635
0.893617	0.921569	0.924528	0.803571
1	0.92	0.901961	0.8	0.72093
0.94	0.923077	0.90566	0.903226	0.924528	0.808511
1	0.909091	1	0.956522	0.948276	0.888889	0.851852
1	0.921569	0.903846	0.919355	0.923077	0.962264	0.982143	0.87037
0.980392	0.921569	0.944444	0.953125	0.981818	0.9	0.86	0.826923	0.755556
0.927273	0.931034	0.967742	0.942857	0.983871	0.949152	0.896552	0.920635	0.967213	0.875
0.958333	0.980769	1	0.951613	0.961538	1	1	0.865385	1	0.961538	0.910714
1	0.931818	0.934783	0.982759	1	0.978261	0.957447	0.918367	1	0.978723	1	0.930233
0.978261	0.958333	1	0.983607	1	1	1	1	0.959184	1	1	1	1
0.979167	1	1	0.984127	1	0.980392	1	1	1	1	1	0.98	1	0.702703
0.963636	0.965517	0.931034	0.956522	1	0.928571	0.949152	1	0.929825	1	1	1	0.918367	0.923077	0.945454
0.981132	0.963636	0.927273	0.970149	1	1	0.982759	0.983871	0.964286	1	1	1	0.979592	0.918367	0.921569	0.913793
0.982759	1	0.967742	0.986301	1	0.983607	1	0.953846	0.967213	1	1	0.966102	0.962264	0.90566	0.965517	0.903226	0.773585
1	1	0.942308	1	1	1	1	0.982759	0.897959	0.981132	1	1	1	0.911111	0.914894	0.886792	0.943396	0.849057
1	1	0.930233	1	0.928571	0.926829	0.930233	1	0.953488	1	1	1	0.878788	0.947368	1	0.958333	0.955556	0.96	0.951219
0.949152	0.968254	0.936508	0.973333	0.952381	0.898305	0.953125	0.985714	0.96875	1	1	0.984127	0.982456	0.890909	0.95	0.940299	0.953846	0.910448	0.967742	0.877551
1	1	1	0.955882	1	0.946429	0.966102	1	0.947368	1	0.953125	0.982456	1	0.921569	0.982143	0.934426	0.931034	0.803571	0.90566	0.934783	0.833333
1	1	1	0.953846	1	0.943396	0.964286	1	0.963636	0.982143	1	0.981482	1	0.96	0.961538	0.931034	0.927273	0.933333	0.921569	0.904762	0.844828	0.729167
0.980392	0.962264	0.982143	1	0.981818	1	1	0.983333	0.981818	1	1	0.981132	1	1	1	1	0.982456	0.95	0.941176	1	0.96875	0.947368	0.903846
0.983051	0.95	1	1	0.984127	0.983871	1	0.970149	0.95082	0.95082	0.985714	0.966667	0.981818	1	1	1	1	0.971015	0.949152	1	0.986301	0.969697	0.984375	0.693878
Bootstrap #57
0.901639
0.890625	0.888889
0.927536	0.893939	0.9
0.890909	0.965517	1	0.824561
0.839286	0.984127	0.920635	0.854839	0.925926
0.925373	0.955882	0.790323	0.901408	0.951613	0.698113
0.888889	0.946429	1	0.935484	0.960784	0.733333	0.877193
1	0.95082	0.903226	0.940299	0.945454	0.931034	0.954545	0.836735
0.926471	0.971429	0.914286	0.960526	0.935484	0.923077	0.986842	0.87931	0.653846
0.9375	0.953125	0.940299	0.942857	0.948276	0.984375	0.925373	0.983051	0.916667	0.84127
0.90566	0.963636	1	1	0.9375	0.962264	0.966667	0.958333	0.962264	0.95	0.862745
1	0.945454	0.966667	0.951613	1	0.943396	0.95	0.866667	0.962963	0.95082	0.946429	0.911111
0.985915	1	0.943662	0.973684	0.984375	1	0.944444	1	1	1	0.985915	1	1
0.974026	0.987013	0.975	0.963415	0.985915	0.972973	0.975309	1	0.972973	0.936709	0.917808	0.938461	0.970588	0.68254
0.955882	0.985507	0.972222	0.945206	0.967742	0.969697	0.972603	1	0.985075	0.958904	0.955882	1	0.949152	0.913044	0.828571
0.984849	0.952381	0.970588	0.957143	0.983051	1	0.971015	0.982759	0.984127	0.971429	0.984849	0.982143	0.982456	0.873016	0.818182	0.833333
0.984849	1	0.985507	0.986111	0.965517	0.984127	1	0.964912	0.984127	0.971429	1	1	0.964286	0.854839	0.885714	0.90625	0.777778
0.984375	0.984127	0.985075	1	0.982456	0.983607	0.985294	0.963636	0.966667	0.955224	1	0.942308	1	0.985294	0.830769	0.866667	0.933333	0.792453
1	1	1	1	1	0.97619	0.93617	1	1	1	1	1	0.911765	1	1	1	0.977273	0.977273	0.97619
1	1	0.972222	0.945206	0.984127	0.920635	0.913044	0.967213	1	1	1	0.983333	0.949152	0.897059	0.962025	0.957746	0.939394	0.888889	0.969697	0.860465
1	1	1	0.955882	1	0.912281	0.970149	1	1	1	0.984375	0.981482	1	0.921875	0.986667	0.969697	0.95082	0.857143	0.966667	0.925	0.716981
1	0.982759	1	0.952381	0.960784	0.924528	0.95082	0.980392	1	0.984375	0.983051	0.958333	0.959184	1	0.940299	0.95	0.964912	0.982759	0.963636	0.944444	0.854545	0.8125
0.964912	0.964286	0.966667	1	1	1	1	1	1	1	1	1	0.979592	1	1	1	1	0.982456	0.981818	1	0.966667	0.923077	0.959184
0.953125	0.952381	1	1	1	0.95082	1	0.982759	0.95082	0.956522	0.953125	0.944444	0.982456	1	1	1	1	0.984615	0.984127	1	0.970588	0.933333	0.982759	0.816327
Bootstrap #60
0.862745
0.755556	0.867924
0.952381	0.970588	0.969697
0.964286	0.949152	0.983051	0.888889
0.931818	0.959184	0.886364	0.927273	0.866667
0.837209	0.981132	0.844445	0.966667	0.92	0.771429
1	0.982759	1	0.953125	0.886792	0.956522	0.866667
1	0.932203	0.929825	0.955882	0.913793	0.980392	0.981482	0.867924
0.965517	0.967742	0.966667	0.925373	0.95082	0.980769	0.943396	0.910714	0.87931
0.945454	0.966667	0.983051	0.939394	0.949152	1	0.981132	0.907407	0.983871	0.877193
0.938775	0.962963	1	1	0.923077	1	1	0.87234	1	0.90566	0.923077
0.982143	0.966102	0.982759	0.938461	1	0.979592	0.980769	0.982456	1	0.967213	0.983333	0.9
1	1	1	1	0.983051	1	1	1	0.983333	1	0.947368	1	1
0.924528	0.966102	0.964912	0.970149	1	0.979592	1	1	0.983607	0.95	0.983333	1	1	0.770833
0.953125	0.971015	0.938461	0.960526	0.890625	0.928571	0.932203	0.969697	0.956522	0.942029	0.955882	1	0.985507	0.921875	0.939394
0.946429	0.967213	0.983333	0.907692	0.95	1	0.981482	0.965517	0.967742	0.916667	0.95	0.963636	0.983607	0.890909	0.872727	0.83871
0.964286	1	0.983051	0.970588	0.983607	1	1	0.964912	0.967213	1	1	0.981818	0.948276	0.947368	0.910714	0.955882	0.811321
0.947368	0.967742	0.931034	1	0.95082	1	1	0.983333	0.951613	0.9	1	1	0.983871	0.966667	0.875	0.876923	0.968254	0.877193
1	1	1	1	1	1	1	1	0.97561	1	1	1	0.974359	0.973684	1	0.979592	0.923077	0.921053	0.97619
0.979167	1	0.98	0.910714	0.960784	0.95	0.928571	0.979592	0.981132	1	1	1	0.916667	0.959184	0.980392	0.966667	0.92	0.918367	0.981482	0.896552
1	1	1	0.985075	1	0.934783	0.980392	1	0.966102	1	1	1	1	0.964286	1	0.970149	0.910714	0.823529	0.892857	0.916667	0.813953
1	1	1	0.983051	0.938775	0.948718	0.926829	0.979167	0.980769	1	1	1	0.9375	0.979592	0.98	0.948276	0.960784	0.980392	0.961538	0.892857	0.897436	0.809524
0.948276	0.934426	0.95	1	0.951613	1	1	0.966667	0.984615	1	1	0.964912	0.933333	1	1	1	1	0.898305	0.936508	1	0.962963	0.854545	0.921569
0.981818	1	1	1	0.965517	0.957447	1	0.963636	0.983333	0.983607	0.983051	0.941176	1	0.982456	1	1	1	0.928571	0.931034	1	1	0.816327	0.93617	0.788462
Bootstrap #58
0.861538
0.896552	0.90625
0.930556	0.847222	0.926471
0.881356	0.925373	0.949152	0.828125
0.826923	0.936508	0.86	0.793103	0.886792
0.830508	0.928571	0.839286	0.885714	0.919355	0.708333
0.892857	0.9375	1	0.890625	0.965517	0.829787	0.854545
1	0.955224	0.888889	0.957143	0.983607	0.963636	0.968254	0.884615
0.936508	0.971831	0.913793	0.958904	0.968254	0.947368	0.969697	0.87037	0.788462
0.901639	0.942029	0.95	0.914286	0.968254	0.947368	0.9375	0.87037	0.894737	0.777778
0.923077	0.983607	1	1	0.961538	1	1	0.93617	1	0.877551	0.9
0.982456	0.95082	0.981132	0.984849	1	1	0.964912	0.938775	1	0.903846	0.944444	0.878049
1	1	0.941176	0.969231	0.981818	1	0.946429	1	1	1	0.982143	1	1
0.985075	0.986301	0.984127	0.973333	1	0.983333	1	1	0.967742	0.969231	0.969231	0.962963	0.982456	0.816327
0.974026	0.950617	0.972603	0.939759	0.915493	0.956522	0.933333	0.971831	0.958333	0.901408	0.916667	1	0.921875	0.938461	0.887324
0.972603	0.961538	0.971015	0.936709	0.957143	1	0.986667	0.970149	0.955882	0.878788	0.927536	0.95	0.984375	0.934426	0.863636	0.853333
1	1	0.983607	0.972603	0.967742	0.964912	1	1	0.966667	1	1	1	0.981818	0.943396	0.862069	0.915493	0.762712
0.963636	0.983871	0.980769	1	1	0.958333	0.964286	1	0.960784	0.981818	1	0.977273	0.978261	1	0.836735	0.885246	0.933333	0.877551
1	1	0.975	1	0.97619	0.914286	0.954545	1	1	1	1	1	0.939394	1	1	1	0.980392	0.97619	0.9375
1	1	0.967742	0.973333	0.952381	0.929825	0.938461	1	1	1	1	0.981818	0.982456	0.964286	0.953846	0.974026	0.958333	0.935484	0.944444	0.846154
1	1	1	0.953125	1	0.914894	0.982759	1	0.961538	1	0.982143	0.977778	1	0.978723	0.982456	0.985294	0.984375	0.923077	1	0.939394	0.84
1	0.985507	1	0.957143	0.912281	0.944444	0.934426	1	1	1	1	0.980392	0.961538	1	0.933333	0.928571	0.955882	0.966667	0.94	0.948718	0.877193	0.8
1	1	1	1	0.966102	1	1	1	1	1	1	1	1	1	1	1	1	0.983333	0.96	1	0.95	0.980769	0.82
0.943396	0.983607	1	1	1	0.979167	1	1	1	1	0.962264	0.952381	1	1	1	1	0.983871	1	0.953488	1	0.981818	0.954545	0.938775	0.840909
Bootstrap #55
0.846154
0.894737	0.944444
0.953846	0.934211	0.904762
0.944444	0.939394	0.982456	0.894737
0.9375	0.92	0.921875	0.786885	0.811321
0.898305	0.869565	0.918033	0.890625	0.947368	0.709091
0.946429	0.875	1	0.87931	0.92	0.7	0.680851
1	0.986487	0.894737	0.866667	0.882353	0.903226	0.951613	0.843137
0.90566	0.955882	0.964912	0.967742	0.980769	0.915254	0.910714	0.854167	0.816327
0.859649	0.931507	0.952381	0.940299	1	0.940299	0.903226	0.931034	0.951613	0.78
0.968254	0.987013	1	1	0.983051	0.985714	0.985075	0.949152	0.984375	0.929825	0.903226
0.982759	0.971429	1	1	1	0.951613	0.949152	0.88	0.982759	0.921569	0.966667	0.807692
1	0.985714	0.982759	0.95082	1	1	0.983333	1	0.982456	1	0.983333	1	1
0.983607	0.986487	0.95	0.920635	1	0.969697	0.984375	1	0.949152	0.925926	0.916667	0.984375	0.964912	0.816327
0.967742	0.973333	0.951613	0.923077	0.982759	0.955224	0.969231	1	0.933333	0.947368	0.953125	1	0.948276	0.909091	0.792453
0.945454	0.985714	1	0.984127	1	1	1	0.981482	0.964286	0.961538	0.983333	0.983333	0.962264	0.941176	0.816327	0.867924
1	1	1	0.983051	0.957447	0.983051	1	0.98	0.961538	0.979592	1	0.982143	0.98	0.93617	0.941176	0.962963	0.809524
0.962963	0.985294	0.944444	1	0.98	0.983607	0.982759	1	0.923077	1	1	0.982759	0.980769	0.980392	0.901961	0.84	0.893617	0.829268
1	1	0.979167	1	0.97619	0.961538	0.959184	1	0.978723	1	1	1	0.953488	0.976744	1	0.979592	0.952381	0.947368	0.95
1	0.987654	0.985507	0.972603	0.95082	0.897059	0.941176	0.952381	0.985294	1	1	1	0.96875	0.916667	0.970149	0.924242	0.934426	0.948276	0.932203	0.777778
1	1	1	0.951613	1	0.934426	0.966667	1	0.982759	1	0.983607	1	1	0.962264	1	0.948276	0.942308	0.840909	0.895833	0.902439	0.842105
1	0.961039	1	0.957143	0.966667	0.942029	0.955224	0.984127	0.984849	1	1	1	0.967742	0.983871	0.936508	0.921875	0.913793	0.964912	0.910714	0.918367	0.786885	0.836364
0.981818	0.985294	0.982143	1	0.98	1	1	1	1	1	1	1	1	1	1	1	1	0.933333	0.913044	1	0.95	0.895833	0.803922
0.95082	1	1	1	1	0.955224	1	0.966102	0.984127	0.983051	0.984849	0.984849	0.966102	0.947368	1	1	0.965517	0.943396	0.925926	1	0.955882	0.890909	0.954545	0.711111
Bootstrap #62
0.86
0.857143	0.910714
0.961538	0.931507	0.9375
0.894737	0.947368	0.969231	0.88
1	0.982456	0.951613	0.876712	0.857143
0.90566	0.921569	0.872727	0.932432	0.948276	0.744681
1	0.963636	1	0.934211	0.932203	0.87037	0.862745
1	0.981482	0.949152	0.917808	0.929825	0.964912	0.981818	0.84
0.981482	0.980392	0.982759	0.898551	0.90566	0.981818	0.960784	0.921569	0.87234
0.970149	0.952381	0.926471	0.86076	0.925373	0.985507	0.953125	0.954545	0.984849	0.814815
0.982456	0.962264	1	0.960526	0.983333	0.982759	0.981818	0.90566	0.981818	0.94	0.901639
0.984615	0.932203	0.939394	0.964286	1	0.901639	0.915254	0.881356	0.984127	0.948276	0.972603	0.877193
0.979592	0.955556	0.981132	0.971015	0.980769	1	0.978723	1	1	1	1	1	1
0.947368	0.982143	0.967742	0.948052	1	0.983333	1	1	0.964286	0.942308	0.954545	0.982456	0.984615	0.780488
0.949152	0.982759	0.935484	0.935897	0.951613	0.932203	0.947368	0.983607	0.983051	0.963636	0.971015	1	0.953846	0.938775	0.872727
0.931034	0.964912	0.984615	0.949367	0.968254	1	1	0.931034	1	0.982143	0.985714	1	0.9375	0.916667	0.830189	0.896552
0.967742	1	0.969697	0.9375	0.984849	0.916667	0.983607	0.967742	0.983607	1	1	0.983607	0.939394	0.897959	0.877193	0.9	0.842105
0.965517	0.982143	0.95082	1	0.983871	1	1	0.983051	0.964286	0.962264	1	1	0.984615	0.979592	0.846154	0.872727	0.949152	0.877193
1	1	0.978723	1	0.978261	0.977273	0.97561	1	1	1	1	1	0.979592	1	1	1	0.977778	0.978723	1
0.964912	0.962963	0.983871	0.961039	0.931034	0.867924	0.924528	0.927273	1	1	1	0.982143	0.951613	0.886364	0.982759	0.966102	0.983333	0.932203	1	0.925
1	1	1	0.918919	1	0.823529	0.963636	1	0.963636	1	0.969697	0.982143	1	0.957447	0.982759	0.966102	0.948276	0.854545	1	0.951219	0.84
1	0.983333	1	0.924051	0.953125	0.859649	0.931034	0.967742	1	0.982759	1	0.983607	0.955224	1	0.967742	0.96875	0.984615	0.9375	0.984127	0.857143	0.854545	0.833333
0.953488	0.95	0.957447	1	0.978723	1	1	1	1	1	1	1	0.98	1	1	1	1	0.979167	0.977273	1	0.952381	0.976744	0.886364
0.981818	0.960784	1	1	1	0.903846	1	0.962963	0.981132	0.98	1	1	0.966667	1	1	1	0.982456	1	0.981818	1	0.942308	0.942308	0.983051	0.921053
Bootstrap #64
0.883721
0.85	0.867924
0.878049	0.888889	0.925926
0.928571	0.964912	0.963636	0.86
0.886364	0.913793	0.929825	0.87037	0.723404
0.888889	0.877193	0.807692	0.872727	0.910714	0.7
0.930233	0.909091	1	0.925926	0.924528	0.803922	0.76
1	0.943396	0.941176	0.941176	0.960784	0.963636	0.982456	0.875
0.934783	0.95	0.966102	0.983333	1	0.933333	0.934426	0.890909	0.787234
0.914894	0.898305	1	0.95	0.983607	0.952381	0.936508	0.913793	0.946429	0.862069
0.951219	0.944444	1	1	0.941176	1	1	0.921569	1	0.925926	0.867924
0.980392	0.918033	0.915254	0.967742	1	0.969231	0.903226	0.896552	1	0.919355	0.970149	0.87037
1	1	0.981818	0.981818	0.981482	1	0.983051	1	1	1	0.983333	1	1
0.956522	1	1	0.947368	0.982759	0.983871	0.984127	1	1	0.967213	0.951613	0.982143	1	0.765957
1	0.967213	0.948276	0.983333	0.947368	1	1	1	0.944444	0.95082	0.952381	1	0.919355	0.927273	0.932203
0.948276	1	0.957143	0.971831	0.985915	1	0.986842	0.971831	0.954545	0.944444	0.96	0.985507	0.960526	0.955882	0.897059	0.830769
0.956522	1	0.947368	0.965517	1	0.983871	0.984127	0.965517	1	1	1	0.963636	0.935484	1	0.912281	0.894737	0.770492
0.979592	1	1	1	0.966102	1	1	1	1	0.951613	1	0.946429	0.985075	0.947368	0.814815	0.898305	0.945206	0.877193
1	1	0.97561	1	0.975	0.977273	0.977778	1	1	1	1	1	0.956522	1	1	1	0.963636	0.952381	1
1	1	0.967213	1	0.931034	0.918033	0.936508	0.932203	1	1	1	1	0.985294	0.948276	0.984375	0.984615	0.945946	0.951613	0.984849	0.906977
1	1	1	1	1	0.963636	1	1	1	1	1	1	1	1	1	1	0.938461	0.901961	0.90566	0.944444	0.886792
1	0.983051	1	1	0.924528	0.948276	0.949152	0.945454	1	0.948276	0.983871	0.981482	1	1	0.947368	0.983333	0.957143	0.983051	0.912281	1	0.875	0.851064
0.951219	0.944444	0.962264	1	1	1	1	1	0.98	1	1	1	1	1	1	1	0.985507	0.924528	0.946429	1	0.947368	0.866667	0.854167
1	0.942308	1	1	1	0.943396	1	0.980769	1	1	1	1	0.982759	0.98	1	1	1	0.962264	0.944444	1	0.964286	0.886364	0.960784	0.809524
Bootstrap #66
0.907407
0.886792	0.884615
0.896552	0.875	0.894737
0.913793	1	0.983607	0.824561
0.964912	0.945454	0.945454	0.854545	0.892857
0.921875	0.9375	0.866667	0.893939	0.925373	0.692308
0.962963	0.877551	1	0.909091	0.927273	0.854167	0.796296
1	0.924528	0.924528	0.931034	0.966102	0.963636	0.969231	0.826087
1	0.962963	0.943396	0.929825	0.947368	0.962963	0.952381	0.87234	0.829787
0.912281	0.890909	0.966102	0.881356	0.951613	0.948276	0.890625	0.925926	0.947368	0.843137
0.964286	0.944444	1	1	0.948276	0.982143	0.984849	0.92	0.981818	0.942308	0.867924
0.983333	0.965517	0.983051	0.984375	1	0.928571	0.970588	0.944444	0.982759	0.964286	0.967213	0.843137
1	1	0.928571	0.984375	0.967742	1	0.939394	1	0.927273	1	0.967213	1	1
0.985507	1	0.970149	0.942857	0.986111	0.921875	0.974026	1	0.969697	0.919355	0.941176	0.969697	0.985714	0.816667
0.935484	0.984375	0.984375	0.970588	0.954545	0.951613	1	0.983607	0.896552	0.913793	0.953846	1	0.969231	0.883333	0.882353
0.935484	0.968254	0.984375	0.939394	0.954545	1	1	0.949152	0.915254	0.95	0.969697	0.984127	0.953125	0.901639	0.944444	0.819672
0.983871	1	1	0.984849	0.984615	1	1	0.964912	0.929825	0.983051	1	0.983333	1	0.933333	0.942029	0.938461	0.745455
0.984849	1	0.952381	1	1	0.984615	0.986667	0.983871	0.898305	0.95082	1	0.968254	0.985075	0.920635	0.884058	0.876923	0.876923	0.870968
1	1	1	1	1	0.975	0.98	1	0.888889	1	1	1	1	0.897436	1	0.909091	0.883721	0.875	0.886364
1	1	1	1	0.949152	0.945454	0.953846	0.962264	0.924528	1	1	0.982143	1	0.909091	0.938461	0.87931	0.859649	0.851852	0.862069	0.71875
1	1	1	1	1	0.983607	1	1	0.849057	1	0.984375	0.983333	1	0.933333	0.986111	0.938461	0.810345	0.8	0.90625	0.783784	0.830189
1	0.984375	1	1	0.938461	0.968254	0.972603	0.966667	0.933333	1	0.985075	0.967742	0.969231	0.936508	0.929577	0.892308	0.83871	0.887097	0.876923	0.8	0.645833	0.722222
0.966102	0.965517	0.965517	1	0.967742	1	1	0.982143	1	1	1	0.982759	0.983607	1	1	1	0.953125	0.896552	0.985075	1	0.947368	0.896552	0.803571
0.944444	0.981818	1	1	0.983051	0.981818	1	0.980769	0.981482	0.981132	0.982759	0.962264	1	0.945454	1	1	0.967213	0.983051	0.984127	1	0.962963	0.928571	0.967213	0.765957
Bootstrap #68
0.909091
0.857143	0.9375
0.920635	0.941176	0.914286
0.847826	0.963636	0.983333	0.859649
0.981818	0.909091	0.967742	0.9375	0.895833
0.868852	0.926471	0.850746	0.974684	0.881356	0.722222
0.980392	0.901961	1	0.967742	0.957447	0.818182	0.796296
1	0.912281	0.842105	0.870968	0.962264	0.964286	0.955882	0.897959
1	0.920635	0.892308	0.882353	0.983333	0.95082	0.945206	0.909091	0.730769
0.918033	0.90625	0.927536	0.852941	0.983871	0.935484	0.902778	0.912281	0.920635	0.84375
0.933333	0.96	1	0.965517	0.977273	0.956522	0.966102	0.842105	0.958333	0.923077	0.862745
0.980769	0.982143	0.966102	0.984375	1	0.87234	0.9	0.911111	0.962264	0.966102	0.983871	0.928571
0.982456	0.966667	1	0.955224	0.981482	1	1	1	0.983051	1	1	1	1
0.970588	0.986301	0.931507	0.906667	1	0.955224	0.975309	1	0.925373	0.901408	0.918919	1	0.984849	0.8
0.985507	0.972222	0.945946	0.962025	0.919355	0.985507	0.9625	1	0.971429	0.96	0.987342	1	0.936508	0.892308	0.909091
0.967742	0.969697	0.985915	0.972973	0.983333	1	0.986842	0.983051	0.984615	0.971429	1	0.962963	0.966102	0.9	0.885714	0.852941
0.984375	1	0.971831	0.973333	1	0.916667	0.96	0.929825	0.969231	1	1	0.963636	0.912281	0.901639	0.917808	0.917808	0.876923
0.963636	0.983333	0.951613	1	0.981132	0.982143	0.985507	0.960784	0.927273	0.916667	1	1	0.981132	0.946429	0.890625	0.890625	0.951613	0.842105
1	1	0.980392	1	0.975	0.952381	0.982143	1	0.977778	1	1	1	0.948718	0.977778	1	0.982456	0.938775	0.94	0.953488
1	0.967742	0.969697	0.985915	0.944444	0.928571	0.942029	0.962963	0.983607	1	1	1	0.982143	0.892857	0.972222	0.986301	0.9375	0.868852	0.966102	0.769231
1	1	1	0.96875	1	0.941176	1	1	0.981818	1	0.984127	1	1	0.923077	1	0.985075	0.912281	0.811321	0.942308	0.864865	0.816327
1	0.981482	1	0.967213	0.883721	0.914894	0.915254	0.955556	0.980769	0.982759	1	1	0.956522	0.980769	0.968254	0.934426	0.946429	0.947368	0.96	0.885714	0.9	0.804878
1	0.966667	1	1	1	1	1	1	0.965517	1	1	1	0.981482	1	1	1	1	0.984849	0.982759	1	0.983607	0.923077	0.94
0.962264	0.982759	1	1	1	0.981482	1	1	0.963636	0.967213	0.968254	0.955556	1	1	1	1	1	0.984127	0.981818	1	0.982759	0.918367	0.958333	0.704545
Bootstrap #61
0.883721
0.85	0.867924
0.878049	0.888889	0.925926
0.928571	0.964912	0.963636	0.86
0.886364	0.913793	0.929825	0.87037	0.723404
0.888889	0.877193	0.807692	0.872727	0.910714	0.7
0.930233	0.909091	1	0.925926	0.924528	0.803922	0.76
1	0.943396	0.941176	0.941176	0.960784	0.963636	0.982456	0.875
0.934783	0.95	0.966102	0.983333	1	0.933333	0.934426	0.890909	0.787234
0.914894	0.898305	1	0.95	0.983607	0.952381	0.936508	0.913793	0.946429	0.862069
0.951219	0.944444	1	1	0.941176	1	1	0.921569	1	0.925926	0.867924
0.980392	0.918033	0.915254	0.967742	1	0.969231	0.903226	0.896552	1	0.919355	0.970149	0.87037
1	1	0.981818	0.981818	0.981482	1	0.983051	1	1	1	0.983333	1	1
0.956522	1	1	0.947368	0.982759	0.983871	0.984127	1	1	0.967213	0.951613	0.982143	1	0.765957
1	0.967213	0.948276	0.983333	0.947368	1	1	1	0.944444	0.95082	0.952381	1	0.919355	0.927273	0.932203
0.948276	1	0.957143	0.971831	0.985915	1	0.986842	0.971831	0.954545	0.944444	0.96	0.985507	0.960526	0.955882	0.897059	0.830769
0.956522	1	0.947368	0.965517	1	0.983871	0.984127	0.965517	1	1	1	0.963636	0.935484	1	0.912281	0.894737	0.770492
0.979592	1	1	1	0.966102	1	1	1	1	0.951613	1	0.946429	0.985075	0.947368	0.814815	0.898305	0.945206	0.877193
1	1	0.97561	1	0.975	0.977273	0.977778	1	1	1	1	1	0.956522	1	1	1	0.963636	0.952381	1
1	1	0.967213	1	0.931034	0.918033	0.936508	0.932203	1	1	1	1	0.985294	0.948276	0.984375	0.984615	0.945946	0.951613	0.984849	0.906977
1	1	1	1	1	0.963636	1	1	1	1	1	1	1	1	1	1	0.938461	0.901961	0.90566	0.944444	0.886792
1	0.983051	1	1	0.924528	0.948276	0.949152	0.945454	1	0.948276	0.983871	0.981482	1	1	0.947368	0.983333	0.957143	0.983051	0.912281	1	0.875	0.851064
0.951219	0.944444	0.962264	1	1	1	1	1	0.98	1	1	1	1	1	1	1	0.985507	0.924528	0.946429	1	0.947368	0.866667	0.854167
1	0.942308	1	1	1	0.943396	1	0.980769	1	1	1	1	0.982759	0.98	1	1	1	0.962264	0.944444	1	0.964286	0.886364	0.960784	0.809524
Bootstrap #72
0.830508
0.819672	0.907895
0.871429	0.928571	0.918605
0.907407	0.970588	0.942029	0.787879
0.912281	0.957143	0.929577	0.761194	0.811321
0.881356	0.945206	0.888889	0.855263	0.919355	0.653846
0.929825	0.925373	1	0.84507	0.931034	0.796296	0.830508
1	0.940299	0.942857	0.905405	0.910714	0.896552	0.9375	0.833333
0.981132	0.984375	0.969697	0.986487	0.942308	0.964286	0.949152	0.903846	0.857143
0.923077	0.919355	0.955224	0.9	0.982143	0.947368	0.933333	0.886792	0.945454	0.916667
0.983871	0.972222	1	0.987952	1	1	1	0.9	1	0.927273	0.910714
0.964286	0.970149	0.971429	1	1	0.931034	0.952381	0.929825	1	0.981132	1	0.894737
1	0.949152	0.951613	0.985915	1	1	0.946429	1	0.980769	1	0.979167	1	1
0.903846	0.953846	0.955882	0.96	1	0.948276	0.951613	1	1	0.960784	0.962264	0.949152	1	0.809524
0.925926	0.921875	0.925373	0.946667	0.946429	0.966667	0.952381	0.983333	0.947368	0.92	0.943396	1	0.925926	0.9375	0.903846
0.9	0.96875	0.970149	0.929577	0.981818	1	0.983871	0.964286	0.944444	0.9375	0.94	1	0.942308	0.956522	0.941176	0.854167
0.961538	1	0.969697	0.972603	0.942308	0.964286	0.966667	1	0.981818	0.958333	1	1	0.875	0.978261	0.960784	0.941176	0.891304
0.895833	0.95082	0.901639	1	0.981132	0.982143	0.983333	1	0.962264	0.957447	1	0.982456	0.960784	0.977778	0.844445	0.87234	0.913044	0.911111
1	1	0.966667	1	0.957447	0.938775	0.943396	1	0.979592	1	1	1	0.956522	0.975	1	0.978723	0.953488	0.952381	0.951219
1	0.96	0.961538	0.976744	0.953846	0.907692	0.943662	0.985507	0.985294	1	1	0.971429	0.984849	0.888889	0.935484	0.936508	0.933333	0.95	0.949152	0.836735
1	1	1	0.975309	1	0.952381	0.970588	1	0.967742	1	0.965517	0.969231	1	0.981482	0.966102	0.949152	0.907407	0.925926	0.963636	0.916667	0.854839
1	0.969697	1	0.973684	0.964286	0.966102	0.951613	1	0.982759	0.960784	1	0.966667	1	0.979592	0.943396	0.903846	0.961538	0.980769	0.96	0.906977	0.777778	0.755102
0.982456	0.954545	0.985915	1	0.982759	1	1	1	0.965517	1	1	1	1	1	1	1	1	0.92	0.980769	1	0.969231	0.949152	0.86
0.963636	0.953846	1	1	1	0.966102	1	0.983051	0.982759	0.980769	0.981482	0.983607	0.982143	1	1	1	0.981132	0.980769	0.980392	1	0.984615	0.929825	0.962963	0.76087
Bootstrap #65
0.892857
0.934426	0.901639
0.924242	0.910448	0.929577
0.884615	0.947368	0.967213	0.904762
0.925926	0.965517	0.932203	0.85	0.88
0.884615	0.909091	0.854545	0.938461	0.943396	0.666667
0.943396	0.945454	1	0.936508	0.897959	0.772727	0.826087
1	0.965517	0.932203	0.904762	0.943396	0.901961	0.943396	0.826087
0.942308	0.944444	0.965517	0.935484	0.94	0.918367	0.960784	0.891304	0.738095
0.931034	0.933333	0.969231	0.926471	0.983051	0.965517	0.928571	0.945454	0.965517	0.882353
0.966102	0.967213	1	0.985915	0.946429	0.964912	0.964912	0.882353	0.964912	0.943396	0.894737
0.983051	0.912281	0.951613	0.971015	1	0.925926	0.925926	0.923077	0.964286	0.981482	0.983607	0.826923
0.982759	1	0.967742	0.955224	0.982143	1	0.963636	1	0.982143	1	1	1	1
0.983871	1	1	0.957746	1	0.966102	0.966102	1	1	0.982456	0.984375	0.967742	1	0.622222
0.970149	0.955882	0.957746	0.961039	0.953125	0.984849	0.969231	1	0.936508	0.967742	0.971015	1	0.921875	0.866667	0.909091
0.923077	0.964286	0.966102	0.969231	0.981132	1	0.981132	1	0.941176	0.9375	0.964286	0.982143	0.981818	0.877551	0.907407	0.839286
0.982456	1	0.967213	0.970149	0.962963	0.943396	0.981818	0.961538	0.981818	0.960784	1	0.982759	0.945454	0.963636	0.948276	0.901639	0.8
0.982759	1	0.95082	1	0.982143	0.963636	0.963636	0.981482	0.963636	0.961538	1	0.947368	0.982759	0.964286	0.931034	0.903226	0.942308	0.836735
1	1	0.978261	1	0.974359	0.918919	0.947368	1	0.974359	1	1	1	0.97561	0.975	1	0.98	0.972973	0.974359	0.921053
1	1	0.970149	0.986487	0.966667	0.931034	0.931034	0.983051	0.983607	1	1	0.984375	0.984127	0.983871	0.953125	0.986111	0.965517	0.983607	0.95	0.85
1	1	1	0.963636	1	0.952381	1	1	0.952381	1	0.978723	0.978261	1	0.977273	0.979167	0.981482	0.923077	0.842105	0.953488	0.962963	0.888889
1	0.98	1	0.965517	0.955556	0.931818	0.955556	0.977273	0.978261	1	1	0.979592	0.979167	0.978723	0.980392	0.964286	0.928571	0.880952	0.956522	0.931034	0.918367	0.703704
1	1	1	1	0.966667	1	1	0.965517	1	1	1	0.968254	0.984127	1	1	1	0.965517	0.949152	0.967213	1	0.969697	0.863636	0.87234
0.951613	0.984849	1	1	0.967213	1	1	0.966102	0.967213	0.965517	0.984849	0.952381	1	0.984127	1	1	0.966102	0.983871	0.967742	1	0.985294	0.959184	0.961538	0.767857
Bootstrap #70
0.830508
0.819672	0.907895
0.871429	0.928571	0.918605
0.907407	0.970588	0.942029	0.787879
0.912281	0.957143	0.929577	0.761194	0.811321
0.881356	0.945206	0.888889	0.855263	0.919355	0.653846
0.929825	0.925373	1	0.84507	0.931034	0.796296	0.830508
1	0.940299	0.942857	0.905405	0.910714	0.896552	0.9375	0.833333
0.981132	0.984375	0.969697	0.986487	0.942308	0.964286	0.949152	0.903846	0.857143
0.923077	0.919355	0.955224	0.9	0.982143	0.947368	0.933333	0.886792	0.945454	0.916667
0.983871	0.972222	1	0.987952	1	1	1	0.9	1	0.927273	0.910714
0.964286	0.970149	0.971429	1	1	0.931034	0.952381	0.929825	1	0.981132	1	0.894737
1	0.949152	0.951613	0.985915	1	1	0.946429	1	0.980769	1	0.979167	1	1
0.903846	0.953846	0.955882	0.96	1	0.948276	0.951613	1	1	0.960784	0.962264	0.949152	1	0.809524
0.925926	0.921875	0.925373	0.946667	0.946429	0.966667	0.952381	0.983333	0.947368	0.92	0.943396	1	0.925926	0.9375	0.903846
0.9	0.96875	0.970149	0.929577	0.981818	1	0.983871	0.964286	0.944444	0.9375	0.94	1	0.942308	0.956522	0.941176	0.854167
0.961538	1	0.969697	0.972603	0.942308	0.964286	0.966667	1	0.981818	0.958333	1	1	0.875	0.978261	0.960784	0.941176	0.891304
0.895833	0.95082	0.901639	1	0.981132	0.982143	0.983333	1	0.962264	0.957447	1	0.982456	0.960784	0.977778	0.844445	0.87234	0.913044	0.911111
1	1	0.966667	1	0.957447	0.938775	0.943396	1	0.979592	1	1	1	0.956522	0.975	1	0.978723	0.953488	0.952381	0.951219
1	0.96	0.961538	0.976744	0.953846	0.907692	0.943662	0.985507	0.985294	1	1	0.971429	0.984849	0.888889	0.935484	0.936508	0.933333	0.95	0.949152	0.836735
1	1	1	0.975309	1	0.952381	0.970588	1	0.967742	1	0.965517	0.969231	1	0.981482	0.966102	0.949152	0.907407	0.925926	0.963636	0.916667	0.854839
1	0.969697	1	0.973684	0.964286	0.966102	0.951613	1	0.982759	0.960784	1	0.966667	1	0.979592	0.943396	0.903846	0.961538	0.980769	0.96	0.906977	0.777778	0.755102
0.982456	0.954545	0.985915	1	0.982759	1	1	1	0.965517	1	1	1	1	1	1	1	1	0.92	0.980769	1	0.969231	0.949152	0.86
0.963636	0.953846	1	1	1	0.966102	1	0.983051	0.982759	0.980769	0.981482	0.983607	0.982143	1	1	1	0.981132	0.980769	0.980392	1	0.984615	0.929825	0.962963	0.76087
Bootstrap #59
0.877193
0.907692	0.836735
0.88	0.90625	0.915493
0.910448	1	0.96875	0.932432
0.966102	0.955556	0.941176	0.919355	0.88
0.944444	0.912281	0.887097	0.948718	0.924242	0.770833
0.967742	0.863636	1	0.939394	0.964912	0.794872	0.680851
1	0.938775	0.886792	0.909091	0.966102	0.911111	0.915254	0.844445
0.985294	0.962264	0.931034	0.897059	0.915254	0.96	0.919355	0.829787	0.836735
0.969231	0.94	0.947368	0.859375	0.931034	0.958333	0.916667	0.94	0.942308	0.791667
0.969697	0.981132	1	0.986301	0.95	0.959184	0.96875	0.941176	0.962963	0.946429	0.924528
1	0.966102	0.969697	0.9875	1	0.90566	0.910448	0.890909	0.967213	0.9	0.95082	0.818182
0.983607	1	0.942308	0.985075	0.982143	1	0.947368	1	0.958333	1	0.98	1	1
0.955882	1	0.967742	0.930556	0.984615	0.981132	1	1	0.946429	0.892857	0.867924	0.929825	0.953846	0.829787
0.986301	1	0.953125	0.974359	0.921875	0.963636	0.956522	0.983051	0.949152	0.934426	0.932203	1	0.924242	0.884615	0.883333
0.916667	0.967742	0.940299	0.936709	0.971831	1	0.986667	0.967742	0.96875	0.970149	0.984849	0.985075	0.986487	0.851852	0.873016	0.861538
0.961039	1	0.971831	0.963855	0.958333	0.967213	0.987013	0.984615	0.953846	0.971015	1	0.985507	0.945206	0.877193	0.910448	0.944444	0.75
1	1	0.981132	1	0.981818	1	1	1	0.934783	0.938775	1	0.98	1	0.953488	0.941176	0.903846	0.948276	0.894737
1	1	0.951219	1	0.953488	0.935484	0.956522	1	0.944444	1	1	1	1	0.9375	1	0.954545	0.958333	0.96	0.935484
1	1	0.954545	0.987654	0.924242	0.946429	0.972222	0.983607	0.967742	1	1	0.96875	0.986111	0.909091	0.904762	0.956522	0.944444	0.931507	0.946429	0.909091
1	1	1	0.986487	1	0.980392	1	1	0.963636	1	1	0.964912	1	0.918367	0.966667	0.968254	0.921875	0.754386	0.844445	0.948718	0.864407
1	1	1	0.985714	0.888889	0.956522	0.95	0.98	0.960784	1	0.981132	0.942308	1	0.957447	0.925926	0.910714	0.898305	0.901639	0.883721	0.911765	0.811321	0.697674
0.96	0.95082	0.955882	1	0.971831	1	1	1	1	1	1	1	0.972603	1	1	1	0.96	0.857143	0.910714	1	0.944444	0.85	0.839286
0.955224	0.981818	1	1	1	1	1	1	0.982456	0.983333	1	1	1	1	1	1	0.955224	0.941176	0.895833	1	0.953846	0.910714	0.963636	0.703704
Bootstrap #76
0.901639
0.882353	0.875
0.969697	0.935897	0.910448
0.940299	0.925	0.972973	0.824324
0.925926	0.893939	0.875	0.861538	0.833333
0.875	0.904762	0.886792	0.923077	0.971831	0.8
0.966102	0.929577	1	0.884058	0.90411	0.864407	0.811321
1	0.939394	0.928571	0.940299	0.957746	0.948276	0.963636	0.896552
0.964286	0.957143	0.983871	0.927536	0.9	0.933333	0.909091	0.824561	0.890909
0.939394	0.950617	1	0.868421	0.927711	0.958904	0.925373	0.838235	1	0.830769
0.963636	0.985915	1	0.971831	0.944444	1	1	0.9	1	0.932203	0.828125
1	0.967742	0.961538	0.951613	1	0.962264	0.98	0.945454	1	0.942308	0.953125	0.981132
0.957447	0.933333	1	0.968254	0.953846	1	1	1	1	1	1	1	1
0.942308	0.985507	0.983051	0.971015	0.986301	0.983333	0.982143	1	1	0.929825	0.926471	0.983051	0.938775	0.7
0.951613	0.974359	0.923077	0.92	0.88	0.985714	0.984849	0.957746	0.953846	0.890625	0.922078	1	0.912281	0.892857	0.866667
0.962264	1	1	0.955882	0.911765	1	1	0.933333	1	0.910714	0.957143	0.965517	0.980392	0.869565	0.884615	0.847458
0.960784	1	0.982456	0.985294	0.956522	0.982759	1	0.983607	1	0.964912	1	0.982456	0.913044	0.958333	0.923077	0.952381	0.808511
0.982456	0.986111	0.932203	1	0.95946	1	1	1	0.910714	0.967742	1	0.967213	1	0.9	0.803922	0.836066	0.966102	0.927273
1	1	0.976744	1	0.982456	0.977273	0.975	1	1	1	1	1	0.909091	1	1	1	1	1	1
0.963636	0.941176	0.983607	0.957143	0.972973	0.95	0.982759	0.984615	1	1	1	1	0.941176	0.92	0.965517	0.970588	0.983051	1	0.983871	0.9
1	1	1	0.969697	1	0.964286	0.981132	1	0.921569	1	1	1	1	1	1	0.984375	0.981482	0.94	0.945454	0.945946	0.903846
1	0.983333	1	0.966667	0.968254	0.96	0.978723	1	1	1	0.984127	0.98	1	1	0.934783	0.964912	0.957447	0.978261	0.938775	0.9	0.840909	0.756757
1	0.967742	1	1	0.953846	1	1	0.964286	0.96	1	1	0.961538	1	1	1	1	1	0.979592	0.981482	1	0.941176	0.911111	0.837838
0.98	0.984615	1	1	0.970588	0.982143	1	0.947368	0.961538	0.963636	0.985294	0.943396	0.978723	0.978723	1	1	1	0.980392	0.982143	1	0.962963	0.9375	0.953488	0.8
Bootstrap #69
0.9
0.924528	0.979592
0.925373	0.968254	0.953125
0.966102	0.875	0.943396	0.907692
0.901639	0.928571	0.912281	0.796875	0.881356
0.888889	0.87234	0.877551	0.90625	0.946429	0.673469
0.916667	0.846154	1	0.892857	0.914894	0.836735	0.809524
1	0.977778	0.933333	0.932203	0.96	0.945454	0.959184	0.868421
0.924528	0.979592	0.938775	0.969231	0.962963	0.966667	1	0.906977	0.8
0.867924	0.960784	0.962264	0.90625	0.964912	0.968254	0.964286	0.93617	0.959184	0.854167
1	1	1	0.985294	0.945454	0.984127	0.982143	0.886364	0.979592	0.897959	0.924528
1	0.981132	0.962963	1	1	0.9	0.927273	0.959184	0.980392	0.962963	0.964912	0.791667
0.95	0.962963	0.982456	0.971831	0.983607	1	0.983333	1	0.981132	1	0.966102	1	1
0.940299	1	1	0.961538	0.985507	0.944444	1	1	0.983607	1	0.954545	0.9375	1	0.779661
1	0.981818	0.964286	0.926471	0.892857	0.885246	0.910714	0.980769	0.981132	0.964286	0.983333	1	0.949152	0.896552	0.875
0.877193	1	0.946429	0.972222	0.967213	1	0.983607	0.981132	0.981482	0.964912	0.983607	0.983333	1	0.87931	0.876923	0.898305
0.938461	1	0.967742	0.932432	0.969697	0.895522	0.953125	1	0.965517	0.984127	1	1	0.903226	0.90625	0.916667	0.939394	0.816667
1	1	1	1	0.967742	0.970588	0.967213	1	0.981818	0.947368	1	0.966667	1	0.952381	0.927536	0.935484	0.984849	0.925373
1	1	0.952381	1	0.956522	0.92	0.955556	1	0.974359	1	1	1	0.978723	0.979592	1	0.979592	0.891304	0.901961	0.938775
0.95946	0.970588	0.956522	0.976471	0.944444	0.906667	0.928571	0.984849	0.985075	1	1	0.972222	0.986667	0.916667	0.963855	0.96	0.917808	0.88	0.961039	0.769231
1	1	1	0.917808	1	0.911765	0.969231	1	0.965517	1	0.984849	0.96875	1	0.955224	0.973684	0.955224	0.873016	0.774193	0.985915	0.857143	0.764706
1	1	1	0.913044	0.915254	0.90625	0.932203	1	0.981818	1	0.983871	0.949152	0.967742	0.984615	0.957746	0.918033	0.953125	0.892308	0.885246	0.938775	0.823529	0.714286
1	1	1	1	0.927273	1	1	0.958333	1	1	1	0.963636	0.964912	1	1	1	0.966667	0.953125	0.894737	1	0.958333	0.936508	0.764706
0.952381	0.982759	1	1	0.968254	0.985714	1	0.943396	0.963636	0.966102	1	0.967213	0.984375	0.953125	1	1	0.953846	1	0.904762	1	0.974684	0.986111	0.887097	0.745098
Bootstrap #74
0.87037
0.935484	0.777778
0.938461	0.857143	0.866667
0.886792	0.955224	0.958333	0.835821
0.938775	0.95	0.885246	0.907692	0.87037
0.958333	0.910714	0.918033	0.954545	0.946429	0.844445
0.958333	0.948276	1	0.938461	0.946429	0.893617	0.837209
1	0.9375	0.926471	0.929577	0.842105	0.982759	0.944444	0.903846
0.960784	0.967742	0.954545	0.925373	0.966667	0.942308	0.918367	0.822222	0.77551
0.907407	0.970588	0.958333	0.916667	0.969697	0.966102	0.907407	0.927273	0.952381	0.872727
0.979592	1	1	0.970149	0.982759	1	1	0.888889	1	0.960784	0.927273
1	0.925926	0.95	0.96875	1	0.979167	0.906977	0.853659	1	0.958333	1	0.931818
1	1	1	0.96875	1	1	1	1	0.981132	1	1	1	1
0.984375	0.986667	0.974684	0.962963	1	0.901639	0.951613	1	0.985915	0.969697	0.972222	0.934426	1	0.784314
0.966667	0.957143	0.945946	0.961538	0.971015	0.95082	1	0.983607	0.938461	0.934426	0.971015	1	0.946429	0.907407	0.850746
1	0.985294	0.986301	0.973333	0.984849	1	1	0.945454	0.968254	0.948276	0.969231	0.982456	0.962264	0.921569	0.893939	0.833333
1	1	0.985507	1	1	1	1	0.961538	0.983333	1	1	0.981132	0.98	0.9375	0.887097	0.918033	0.784314
0.982759	0.985507	0.943662	1	0.985075	0.983333	0.982759	0.982759	0.935484	0.983607	1	0.907407	1	0.962963	0.766667	0.854839	0.919355	0.854545
1	1	0.981132	1	0.978261	0.947368	0.972973	1	0.977273	1	1	1	1	0.970588	1	0.979592	0.954545	0.95	0.955556
0.981818	1	0.985915	1	0.968254	0.945454	0.981818	0.981818	0.983871	1	1	1	0.980769	0.94	0.985714	0.969697	0.95082	0.909091	0.951613	0.871795
1	1	1	1	1	1	1	1	0.965517	1	0.949152	1	1	0.958333	1	0.984375	0.910714	0.86	0.949152	0.948718	0.843137
1	1	1	1	0.981132	1	1	1	0.980392	0.956522	1	1	0.923077	0.97561	0.965517	0.963636	0.918367	0.957447	0.941176	0.9	0.914894	0.829268
0.965517	0.924242	0.972973	1	0.970149	1	1	0.983051	0.953125	1	1	0.983051	0.963636	1	1	1	0.985075	0.896552	0.954545	1	0.935484	0.854545	0.854167
0.980769	0.967742	1	1	0.983607	0.981482	1	0.960784	1	1	0.983607	0.960784	0.979592	1	1	1	1	0.963636	0.949152	1	0.964912	0.901961	0.909091	0.6875
Bootstrap #63
0.865385
0.907407	0.923077
0.921875	0.842105	0.9
0.888889	0.963636	0.982143	0.901639
0.925926	0.877551	0.962264	0.898305	0.901961
0.875	0.867924	0.846154	0.955224	0.983333	0.717391
0.941176	0.840909	1	0.929825	0.893617	0.717949	0.690476
1	0.959184	0.914894	0.929825	0.96	0.93617	0.962264	0.878049
0.95	0.928571	0.965517	0.955224	0.948276	0.886792	0.877193	0.829787	0.921569
0.87931	0.892857	0.966667	0.909091	0.967213	0.890909	0.881356	0.882353	0.963636	0.777778
0.945454	1	1	0.984375	0.901961	0.981132	0.982759	0.888889	0.979592	0.964912	0.910714
1	0.970149	0.985294	1	1	0.920635	0.942029	0.896552	0.984127	0.910448	0.958333	0.903226
0.982759	1	0.962963	0.984615	0.982143	1	0.965517	1	0.959184	1	0.966667	1	1
0.966667	0.982759	0.964912	0.970149	0.983051	1	1	1	0.981132	0.894737	0.916667	0.964286	0.956522	0.865385
0.919355	0.967742	0.95082	0.986301	0.951613	1	1	1	0.946429	0.9375	0.955224	1	0.930556	0.836364	0.824561
0.947368	0.963636	0.963636	0.969231	0.982456	1	0.983333	0.980392	0.96	1	1	1	0.985507	0.8125	0.846154	0.75
0.983051	1	0.982143	0.984849	0.964286	0.981818	1	1	0.96	0.966102	1	1	0.970588	0.903846	0.909091	0.934426	0.862745
0.984375	0.983607	0.949152	1	0.967213	0.948276	0.952381	1	0.944444	0.96875	1	0.966102	1	0.949152	0.818182	0.833333	0.894737	0.913793
1	1	0.976744	1	0.977273	0.897436	0.883721	1	0.945946	1	1	1	0.963636	0.952381	1	0.96	0.953488	0.953488	0.888889
0.951613	1	0.966667	1	0.932203	0.910714	0.918033	0.982143	0.963636	1	1	1	1	0.931034	0.951613	0.923077	0.894737	0.913793	0.866667	0.780488
1	1	1	0.985507	1	0.982759	1	1	0.877551	1	0.952381	1	1	0.928571	1	0.969697	0.948276	0.849057	0.9	0.956522	0.881356
1	1	1	0.985507	0.929825	0.964912	0.984127	0.981482	0.962264	0.984127	0.984615	0.982759	0.957143	0.965517	0.894737	0.920635	0.87037	0.948276	0.842105	0.933333	0.821429	0.857143
1	0.983333	1	1	0.912281	1	1	0.943396	0.981818	1	1	0.947368	0.957746	1	1	1	1	0.966667	0.936508	1	0.936508	0.916667	0.818182
0.945206	1	1	1	0.958333	1	1	0.954545	0.985294	0.987013	0.974359	0.926471	1	0.986301	1	1	0.972603	0.972603	0.947368	1	0.987342	0.945946	0.945946	0.704918
Bootstrap #78
0.930233
0.857143	0.875
0.956522	0.977778	0.857143
0.953488	0.97619	0.960784	0.875
0.938775	0.958333	0.928571	0.844445	0.934783
0.914894	0.934783	0.927273	0.914894	0.978723	0.658537
0.982143	0.942308	1	0.963636	0.981132	0.803922	0.8
1	0.886364	0.907407	0.914894	0.956522	0.962264	0.961538	0.867924
0.946429	0.903846	0.919355	0.964912	1	0.932203	0.892857	0.847458	0.784314
0.925926	0.923077	0.96875	0.945454	1	0.966667	0.910714	0.936508	0.948276	0.830508
0.960784	0.959184	1	0.980769	0.93617	0.982143	0.981818	0.892857	0.981818	0.915254	0.875
1	0.958333	0.965517	1	1	0.88	0.962264	0.826923	0.981482	0.932203	0.949152	0.882353
1	1	1	0.979167	0.977778	1	1	1	1	1	1	1	1
0.983333	1	0.970149	0.929825	1	0.968254	0.984127	1	0.933333	0.971429	0.955882	1	1	0.708333
0.942308	0.980769	0.967213	0.942308	0.938775	0.907407	0.925926	1	0.982456	0.96875	0.984375	1	0.946429	0.943396	0.920635
0.978723	0.977778	0.943396	0.956522	0.977273	1	1	0.963636	0.98	0.982759	0.982456	1	0.96	0.886364	0.849057	0.877551
0.981818	1	0.967742	0.962963	0.94	0.983051	1	0.951613	0.964912	1	1	0.966102	0.947368	0.944444	0.85	0.95	0.833333
1	1	0.948276	1	0.958333	0.963636	0.962963	0.983607	0.981818	0.967742	1	1	1	0.961538	0.935484	0.928571	0.960784	0.948276
1	1	1	1	1	0.951219	0.95	1	1	1	1	1	0.925	1	1	1	0.973684	0.978261	0.952381
0.984849	1	1	0.969231	0.967742	0.854839	0.939394	0.929577	1	1	1	1	0.924242	0.985075	0.974359	0.957746	0.969231	0.958333	0.956522	0.90566
1	1	1	0.948276	1	0.934426	0.967742	1	0.967742	1	0.971015	1	1	1	1	0.969697	0.983333	0.921875	0.952381	0.938775	0.84058
1	0.979592	1	0.938775	0.957447	0.943396	0.962264	1	1	0.95	1	1	0.981818	1	0.968254	0.946429	0.96	0.983051	0.924528	0.951219	0.873016	0.75
0.96	0.913044	0.965517	1	0.934783	1	1	0.983333	0.962264	1	1	0.982143	0.962963	1	1	1	1	0.983051	0.963636	1	0.940299	0.916667	0.857143
1	1	1	1	0.982143	0.896552	1	0.904762	0.983871	0.985714	1	0.984375	0.915254	0.966102	1	1	1	0.985075	0.968254	1	0.932432	0.926471	0.933333	0.769231
Bootstrap #80
0.930233
0.857143	0.875
0.956522	0.977778	0.857143
0.953488	0.97619	0.960784	0.875
0.938775	0.958333	0.928571	0.844445	0.934783
0.914894	0.934783	0.927273	0.914894	0.978723	0.658537
0.982143	0.942308	1	0.963636	0.981132	0.803922	0.8
1	0.886364	0.907407	0.914894	0.956522	0.962264	0.961538	0.867924
0.946429	0.903846	0.919355	0.964912	1	0.932203	0.892857	0.847458	0.784314
0.925926	0.923077	0.96875	0.945454	1	0.966667	0.910714	0.936508	0.948276	0.830508
0.960784	0.959184	1	0.980769	0.93617	0.982143	0.981818	0.892857	0.981818	0.915254	0.875
1	0.958333	0.965517	1	1	0.88	0.962264	0.826923	0.981482	0.932203	0.949152	0.882353
1	1	1	0.979167	0.977778	1	1	1	1	1	1	1	1
0.983333	1	0.970149	0.929825	1	0.968254	0.984127	1	0.933333	0.971429	0.955882	1	1	0.708333
0.942308	0.980769	0.967213	0.942308	0.938775	0.907407	0.925926	1	0.982456	0.96875	0.984375	1	0.946429	0.943396	0.920635
0.978723	0.977778	0.943396	0.956522	0.977273	1	1	0.963636	0.98	0.982759	0.982456	1	0.96	0.886364	0.849057	0.877551
0.981818	1	0.967742	0.962963	0.94	0.983051	1	0.951613	0.964912	1	1	0.966102	0.947368	0.944444	0.85	0.95	0.833333
1	1	0.948276	1	0.958333	0.963636	0.962963	0.983607	0.981818	0.967742	1	1	1	0.961538	0.935484	0.928571	0.960784	0.948276
1	1	1	1	1	0.951219	0.95	1	1	1	1	1	0.925	1	1	1	0.973684	0.978261	0.952381
0.984849	1	1	0.969231	0.967742	0.854839	0.939394	0.929577	1	1	1	1	0.924242	0.985075	0.974359	0.957746	0.969231	0.958333	0.956522	0.90566
1	1	1	0.948276	1	0.934426	0.967742	1	0.967742	1	0.971015	1	1	1	1	0.969697	0.983333	0.921875	0.952381	0.938775	0.84058
1	0.979592	1	0.938775	0.957447	0.943396	0.962264	1	1	0.95	1	1	0.981818	1	0.968254	0.946429	0.96	0.983051	0.924528	0.951219	0.873016	0.75
0.96	0.913044	0.965517	1	0.934783	1	1	0.983333	0.962264	1	1	0.982143	0.962963	1	1	1	1	0.983051	0.963636	1	0.940299	0.916667	0.857143
1	1	1	1	0.982143	0.896552	1	0.904762	0.983871	0.985714	1	0.984375	0.915254	0.966102	1	1	1	0.985075	0.968254	1	0.932432	0.926471	0.933333	0.769231
Bootstrap #73
0.918367
0.918033	0.854545
0.935484	0.932203	0.914286
0.919355	0.967742	0.95946	0.833333
1	1	0.948276	0.87037	0.830189
1	1	0.982456	0.964286	0.946429	0.69697
1	1	1	0.919355	0.903226	0.790698	0.804878
1	0.923077	0.938461	0.938461	0.90625	0.875	0.9375	0.823529
0.963636	0.981132	0.969231	0.969231	0.969697	1	0.911111	0.884615	0.909091
0.962264	0.96	0.968254	0.934426	0.952381	1	1	0.962963	0.982456	0.901961
0.966667	0.964912	1	0.985915	0.942029	0.944444	0.941176	0.811321	0.951613	0.95	0.890909
1	0.982143	0.955224	1	1	0.9	0.893617	0.87037	0.95	0.966102	1	0.862069
0.974359	1	1	1	0.98	1	1	1	1	1	0.973684	1	1
0.895833	0.913044	0.932203	1	0.984127	1	1	1	0.981818	0.961538	0.980392	0.964912	1	0.84375
0.9375	0.916667	0.869565	0.973684	0.917808	0.95	0.928571	0.985294	0.971015	0.938461	0.984849	1	0.941176	0.938775	0.916667
0.933333	0.953488	0.964286	0.945454	0.964912	1	0.974359	0.979167	1	0.979167	0.978261	1	1	0.857143	0.875	0.928571
0.978261	1	0.944444	0.982143	1	0.97561	1	0.956522	0.979592	1	1	0.960784	0.914894	0.966667	0.952381	0.946429	0.818182
0.934426	0.931034	0.863636	1	0.958904	0.983051	0.982143	1	0.953846	0.952381	1	0.971015	1	1	0.830189	0.867647	1	0.943396
1	1	0.963636	1	0.964286	0.923077	0.885714	1	1	1	1	1	0.891304	1	1	1	1	1	0.981818
1	1	0.953846	0.985075	0.938461	0.847826	0.913044	0.946429	1	1	1	1	0.966667	1	0.981482	0.985507	0.979592	1	0.984849	0.886364
1	1	1	0.964912	1	0.952381	0.975	1	1	1	0.978723	1	1	1	1	0.983333	1	0.918919	0.945454	0.974359	0.813953
1	0.960784	1	0.96875	0.936508	0.9375	0.933333	0.982143	1	0.963636	0.981482	0.983607	1	1	0.960784	0.969697	0.978723	0.978261	0.968254	0.955556	0.84	0.804878
1	0.949152	1	1	0.972973	1	1	0.984615	0.953846	1	1	0.985714	0.954545	1	1	1	1	0.962963	0.957746	1	0.919355	0.862745	0.859649
0.965517	1	1	1	0.985714	0.962264	1	0.948276	0.983871	0.983333	1	0.984615	0.967742	0.976744	1	1	0.96	0.959184	0.954545	1	0.966667	0.918367	0.947368	0.673077
Bootstrap #67
0.821429
0.875	0.881356
0.935065	0.898551	0.921053
0.865385	0.918367	1	0.938461
0.95082	0.982456	0.967742	0.766667	0.914894
0.933333	0.90566	0.896552	0.895522	0.959184	0.755556
0.95082	0.90566	1	0.911765	0.9375	0.833333	0.755556
1	0.952381	0.956522	0.935065	0.907407	0.915254	0.933333	0.857143
0.940299	0.984375	0.971015	0.974684	0.964286	0.95	0.95	0.875	0.816667
0.95	0.982143	0.913793	0.971831	0.979592	0.981482	0.962264	0.962264	0.932203	0.872727
0.966667	1	1	1	0.957447	0.961538	0.961538	0.875	0.966667	0.948276	0.980769
1	0.978261	0.960784	0.967213	1	0.953488	0.928571	0.875	0.960784	1	1	0.868421
0.984375	1	0.984375	0.972603	0.96	1	0.982143	1	0.968254	1	0.962963	1	1
0.934426	0.964912	0.968254	0.958333	1	0.982143	0.982143	1	0.951613	0.984127	0.962963	1	1	0.816327
0.958904	0.970588	0.944444	0.925	0.932203	0.920635	0.920635	0.985075	0.914286	0.897059	0.936508	1	0.982143	0.868852	0.904762
0.910448	1	1	0.975309	0.947368	1	1	0.934426	0.926471	0.925373	0.933333	0.983871	0.941176	0.842105	0.821429	0.833333
0.96875	1	0.984615	0.958904	0.980769	0.964286	1	0.982456	0.918033	0.984375	1	0.981818	0.931818	0.907407	0.843137	0.955224	0.844828
0.966667	0.962963	0.892857	1	0.979167	1	1	1	0.931034	0.966102	1	0.980392	1	0.962264	0.921569	0.881356	0.95	0.857143
1	1	1	1	1	1	1	1	0.955556	1	1	1	0.962963	0.947368	1	0.959184	0.956522	0.948718	0.942857
0.982759	1	1	0.938461	0.977778	0.9375	0.9375	1	0.964912	1	1	1	0.974359	0.938775	0.96	0.894737	0.947368	0.918367	0.934783	0.903226
1	1	1	0.924242	1	0.895833	0.94	1	0.966102	1	1	1	1	0.961538	1	0.916667	0.931034	0.829787	0.891304	0.909091	0.736842
1	0.966102	1	0.930556	0.981132	0.907407	0.946429	1	0.969231	0.952381	1	1	1	0.965517	0.965517	0.907692	0.920635	0.910714	0.882353	0.923077	0.826087	0.697674
1	0.984127	1	1	0.982143	1	1	1	0.985507	1	1	1	0.98	1	1	1	0.985714	0.933333	0.928571	1	0.924528	0.886792	0.898305
0.942029	0.984849	1	1	1	1	1	1	0.986111	0.985915	1	1	1	0.96875	1	1	0.942857	0.969231	0.932203	1	1	0.966667	0.969697	0.634615
Bootstrap #77
0.857143
0.872727	0.857143
0.926471	0.936508	0.822581
0.916667	0.982759	0.934426	0.830769
0.945454	0.980392	0.90566	0.85	0.849057
0.983051	0.897959	0.846154	0.907692	0.932203	0.755556
0.964912	0.960784	1	0.923077	0.949152	0.804348	0.8125
1	1	0.888889	0.854839	0.913793	0.88	0.884615	0.836735
0.935484	0.983051	0.935484	0.930556	0.938461	0.931034	0.933333	0.875	0.836364
0.95	0.982143	0.932203	0.911765	0.96875	0.982759	0.966102	0.888889	0.929825	0.844828
0.981482	1	1	0.96875	0.945454	0.98	0.980769	0.916667	0.980769	0.946429	0.923077
0.96875	0.928571	0.952381	0.930556	1	0.966667	0.877193	0.894737	0.984127	0.955224	0.984849	0.907407
0.982456	0.980392	1	0.985294	0.983333	1	1	1	0.962963	1	0.982759	1	1
0.945946	0.956522	0.931507	0.965116	0.9875	0.957746	0.986667	1	0.944444	0.891892	0.946667	0.955882	1	0.786885
0.913793	0.944444	0.95	0.986301	0.935484	0.964912	0.966102	1	0.966102	1	1	1	1	0.927273	0.902778
0.951613	0.982759	0.934426	0.986667	0.985075	1	0.95	0.966667	0.967213	0.985294	1	0.982456	0.938461	0.910714	0.92	0.935484
0.982143	1	1	0.985075	0.947368	0.960784	0.981482	1	0.921569	0.948276	1	1	0.948276	0.895833	0.942029	0.945454	0.823529
0.907407	0.94	0.927273	1	0.983607	0.981482	0.982143	1	0.963636	0.894737	1	0.96	0.967213	0.962264	0.828125	0.846154	0.912281	0.941176
1	1	0.958333	1	0.960784	0.930233	0.956522	1	0.956522	1	1	1	0.92	0.954545	1	0.959184	0.87234	0.846154	0.931818
0.971015	0.984375	0.924242	0.975	0.972222	0.953125	0.938461	1	0.970149	1	1	0.967742	0.972603	0.901639	0.964286	0.956522	0.84375	0.842105	0.9375	0.795918
1	1	1	0.985075	1	0.960784	1	1	0.942308	1	1	0.958333	1	0.94	0.971831	0.964286	0.867924	0.818182	0.941176	0.846154	0.8
1	0.962264	1	0.985915	0.95082	0.982143	0.964912	1	0.964912	0.984375	0.983607	0.941176	0.984375	0.963636	0.915493	0.912281	0.915254	0.943396	0.90566	0.934783	0.888889	0.808511
0.983051	0.981132	0.983051	1	0.983871	1	1	0.982143	1	1	1	0.980769	0.984127	1	1	1	1	1	0.982143	1	0.938461	0.942308	0.886792
1	0.978261	1	1	0.981818	0.979167	1	0.979592	0.959184	0.963636	1	0.977778	1	0.979167	1	1	1	1	0.979592	1	0.983607	0.956522	0.96	0.813953
Bootstrap #84
0.893617
0.816327	0.893617
0.893939	0.953125	0.893939
0.934426	1	0.916667	0.873239
0.921569	0.957447	0.854167	0.852459	0.807692
0.903846	0.9375	0.903846	0.941176	0.933333	0.714286
0.963636	0.891304	1	0.971429	0.933333	0.851064	0.808511
1	0.962264	0.929825	0.929577	0.9375	0.964286	0.965517	0.823529
0.963636	0.98	0.944444	0.925373	0.984127	0.941176	0.943396	0.901961	0.8
0.928571	0.941176	0.947368	0.863636	0.953125	0.963636	0.907407	0.964912	0.932203	0.843137
0.984127	0.982456	1	0.932432	0.907692	0.966102	0.967213	0.833333	0.969231	0.967213	0.842105
1	0.98	1	1	1	0.941176	0.923077	0.901961	0.965517	0.943396	0.982759	0.875
0.984127	0.964286	0.984127	0.987179	0.985714	1	0.983871	1	1	1	1	1	1
0.940299	0.984375	0.955882	0.938272	0.973684	1	1	1	0.927536	0.939394	0.926471	0.945206	0.985507	0.796875
0.945454	0.96	0.964286	0.971831	0.951613	0.962264	0.944444	1	0.966102	0.944444	0.965517	1	0.963636	0.877193	0.890625
0.945454	1	0.964286	0.971831	0.984375	1	1	1	0.983333	0.982143	0.983051	1	1	0.877193	0.854839	0.791667
0.949152	1	1	0.945206	0.954545	0.964912	1	0.966102	0.951613	1	1	0.985075	0.983333	0.953846	0.897059	0.949152	0.830189
0.984615	0.983051	0.952381	1	0.986111	0.983871	0.984375	0.984375	0.970149	0.934426	1	0.941176	1	0.985915	0.887324	0.862069	0.952381	0.888889
1	1	0.894737	1	0.911111	0.852941	0.921053	1	1	1	1	1	0.921053	1	1	1	1	1	0.979592
0.983607	0.962963	0.931034	0.986842	0.921875	0.843137	0.948276	0.966102	1	1	1	0.985075	0.983333	0.920635	0.943662	0.949152	0.966667	0.96875	0.955224	0.878049
1	1	1	0.958333	1	0.944444	0.982759	1	0.983871	1	0.983607	0.984615	1	0.96875	0.986111	0.983051	0.965517	0.877193	0.985075	1	0.836364
1	0.96	1	0.957143	0.934426	0.921569	0.944444	0.982143	1	1	0.965517	0.95082	0.963636	1	0.924242	0.925926	0.945454	0.949152	0.918033	0.97561	0.912281	0.77551
0.962264	0.957447	0.962264	1	0.949152	1	1	0.941176	1	1	1	0.948276	1	1	1	1	0.981482	0.964912	0.967213	1	0.982759	0.924528	0.877551
1	0.982759	1	1	0.956522	0.983607	1	0.933333	0.985075	0.984127	1	0.955882	0.984127	0.940299	1	1	1	1	0.971831	1	0.954545	0.969231	0.934426	0.680851
Bootstrap #82
0.893617
0.816327	0.893617
0.893939	0.953125	0.893939
0.934426	1	0.916667	0.873239
0.921569	0.957447	0.854167	0.852459	0.807692
0.903846	0.9375	0.903846	0.941176	0.933333	0.714286
0.963636	0.891304	1	0.971429	0.933333	0.851064	0.808511
1	0.962264	0.929825	0.929577	0.9375	0.964286	0.965517	0.823529
0.963636	0.98	0.944444	0.925373	0.984127	0.941176	0.943396	0.901961	0.8
0.928571	0.941176	0.947368	0.863636	0.953125	0.963636	0.907407	0.964912	0.932203	0.843137
0.984127	0.982456	1	0.932432	0.907692	0.966102	0.967213	0.833333	0.969231	0.967213	0.842105
1	0.98	1	1	1	0.941176	0.923077	0.901961	0.965517	0.943396	0.982759	0.875
0.984127	0.964286	0.984127	0.987179	0.985714	1	0.983871	1	1	1	1	1	1
0.940299	0.984375	0.955882	0.938272	0.973684	1	1	1	0.927536	0.939394	0.926471	0.945206	0.985507	0.796875
[truncated: 23,035 more rows]

## Sheet: genetic variation 
Locus	Numb. of Allels	HObs	HExp	PIC	NE-1P	NE-2P	NE-PP	NE-I	NE-SI	F(Null)
BU66737	7	0	0.839	0.799	0.527	0.353	0.176	0.055	0.353	1
BU66738	18	1	0.896	0.868	0.382	0.236	0.081	0.025	0.317	-0.071
BU66750	18	0.28	0.94	0.915	0.277	0.16	0.043	0.012	0.293	0.536
BU66831	33	1	0.981	0.96	0.144	0.078	0.011	0.003	0.27	-0.02
BU66838	25	0.52	0.944	0.921	0.255	0.147	0.034	0.01	0.29	0.284
BU66843	24	0.92	0.954	0.932	0.228	0.129	0.028	0.008	0.284	0.006
BU66862	14	0.16	0.935	0.91	0.292	0.171	0.048	0.013	0.295	0.703
BU66896	26	0.8	0.959	0.937	0.214	0.12	0.025	0.007	0.282	0.083
BU66940	22	0.92	0.953	0.93	0.235	0.134	0.03	0.008	0.285	0.006
BU66946	14	0.36	0.921	0.895	0.327	0.195	0.06	0.017	0.303	0.433
BU66968	17	0.36	0.929	0.904	0.306	0.18	0.052	0.015	0.298	0.439
BU66990	21	0.88	0.944	0.921	0.261	0.15	0.037	0.01	0.29	0.025
BU67012	13	0.12	0.869	0.838	0.447	0.286	0.116	0.036	0.333	0.757
BU67026	21	0.32	0.949	0.926	0.244	0.139	0.032	0.009	0.287	0.491
BU67033	24	0.56	0.967	0.945	0.193	0.107	0.02	0.005	0.278	0.256
BU67051	18	0.4	0.929	0.904	0.301	0.177	0.049	0.014	0.298	0.393
BU67069	26	0.8	0.971	0.949	0.18	0.099	0.017	0.005	0.276	0.086
BU67045	9	0.04	0.84	0.801	0.521	0.347	0.169	0.054	0.352	0.908
BU66995	22	1	0.938	0.914	0.273	0.159	0.04	0.011	0.293	-0.045
BU67000	20	0.64	0.948	0.924	0.251	0.144	0.034	0.009	0.288	0.186
HQ23649	18	0.68	0.943	0.919	0.266	0.153	0.039	0.011	0.291	0.151
Mean	19.524	0.56	0.931	0.905	0.292	0.174	0.054	0.016	0.298	0.315
